# Supplementary material for: Characterisation of magnetic relaxation on extremely long timescales
Source: PubMed Central journal article supplement — Phys Chem Chem Phys. 2023 Jun 2;25(25):16735–44. doi: 10.1039/d3cp01278f (PMC10305666; doi:10.1039/d3cp01278f), 2023-06-02
Supplement: CP-025-D3CP01278F-s001.pdf [file CP-025-D3CP01278F-s001.pdf]

# Supplementary Information for Characterisation of magnetic relaxation on extremely long timescales

William J. A. Blackmore, Gemma K. Gransbury, Peter Evans, Jon G. C.  
Kragoskow, David P. Mills,\* and Nicholas F. Chilton\*

*Department of Chemistry, School of Natural Sciences, University of Manchester, Oxford Road,  
Manchester, M13 9PL, UK*

E-mail: david.mills@manchester.ac.uk; nicholas.chilton@manchester.ac.uk

# **S1 Waveform Analysis**

## **S1.1 2 K Data**



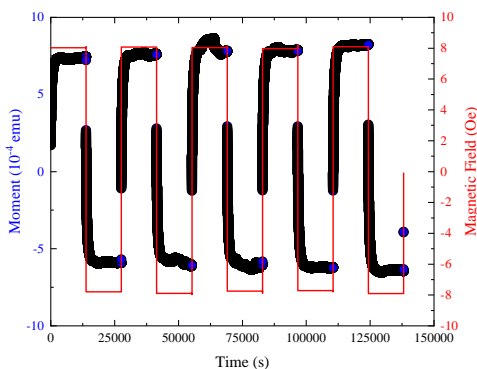

(a) 36  $\mu\text{Hz}$   $M(t)$  data

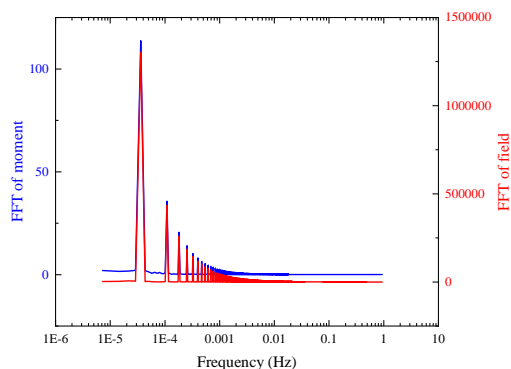

(b) 36  $\mu\text{Hz}$  FFT

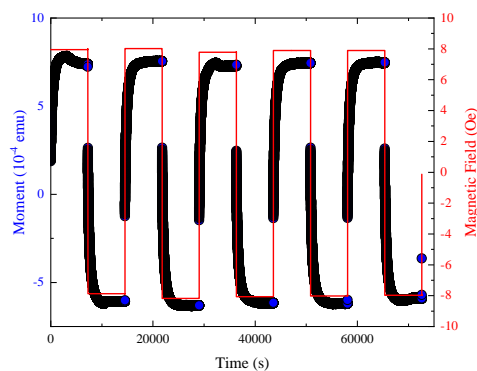

(c) 69  $\mu\text{Hz}$   $M(t)$  data

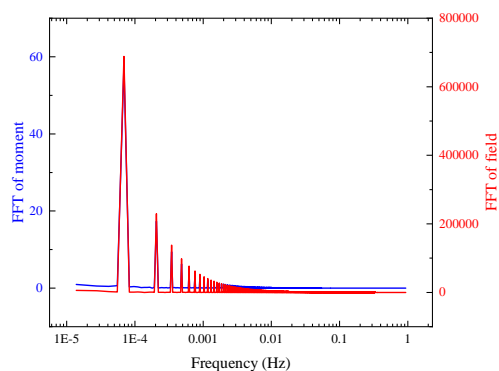

(d) 69  $\mu\text{Hz}$  FFT

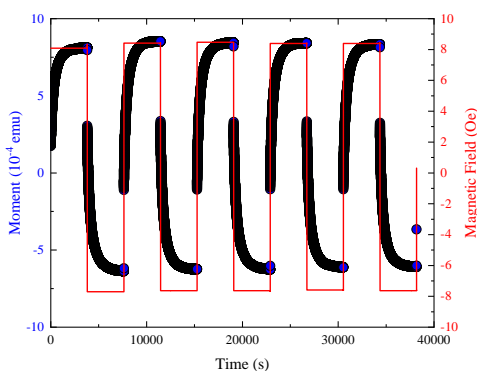

(e) 0.13 mHz  $M(t)$  data

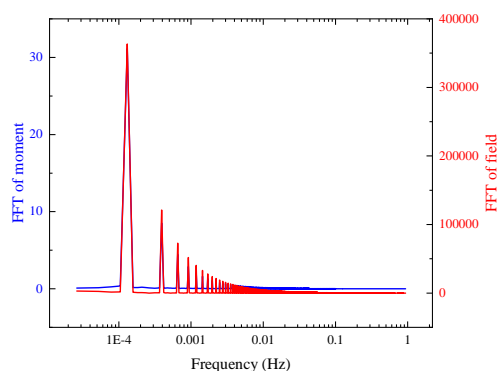

(f) 0.13 mHz FFT

Figure S1: Waveform measurements performed in zero-field at 2 K (left column) with associated Fast Fourier Transforms (FFT - right column)

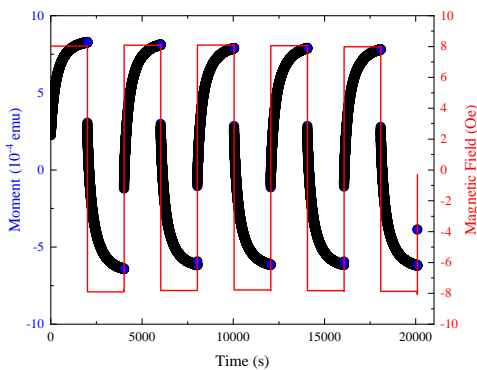

(a) 0.25 mHz  $M(t)$  data

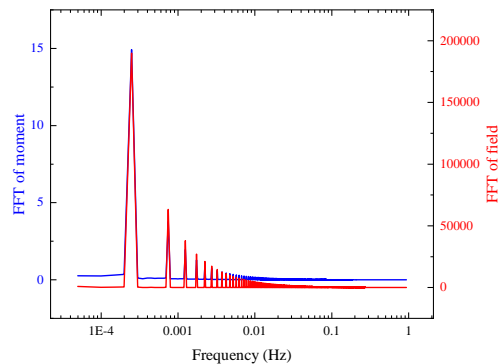

(b) 0.25 mHz FFT

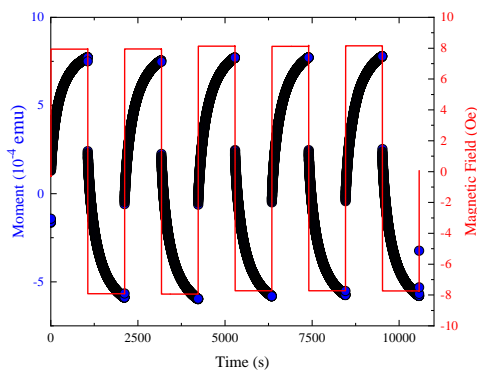

(c) 0.48 mHz  $M(t)$  data

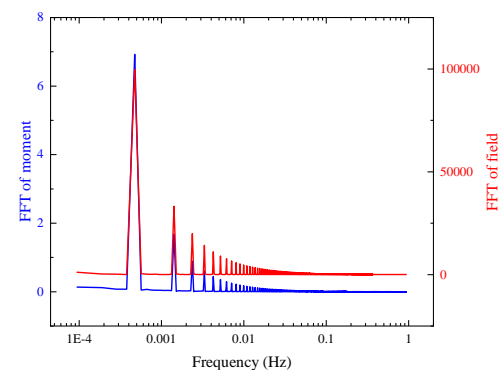

(d) 0.48 mHz FFT

Figure S2: Waveform measurements performed in zero-field at 2 K (left column) with associated Fast Fourier Transforms (FFT - right column)

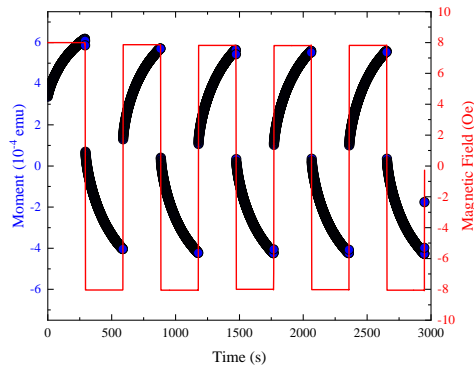

(a) 1p7 mHz  $M(t)$  data

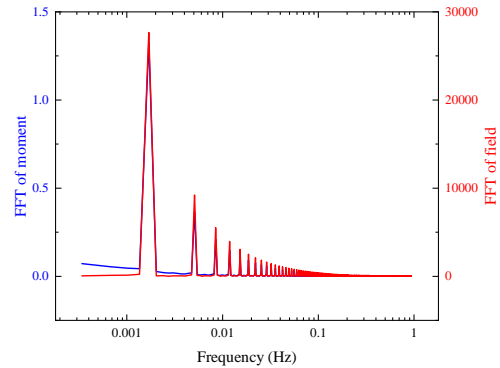

(b) 1.7 mHz FFT

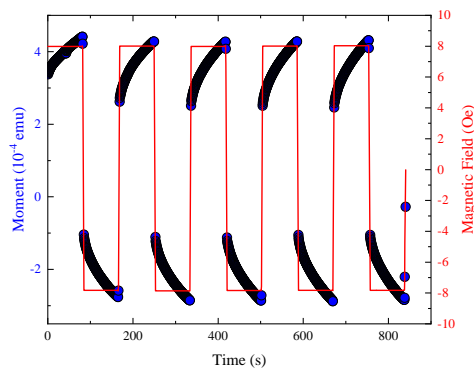

(c) 6 mHz  $M(t)$  data

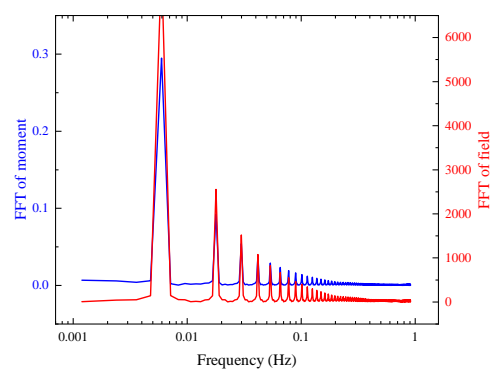

(d) 6 mHz FFT

Figure S3: Waveform measurements performed in zero-field at 2 K (left column) with associated Fast Fourier Transforms (FFT - right column)

## S1.2 4 K Data

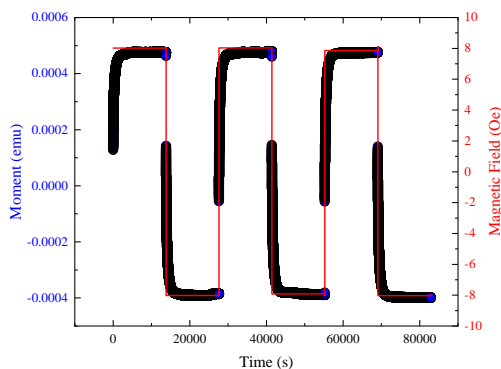

(a)  $36 \mu\text{Hz } M(t)$  data

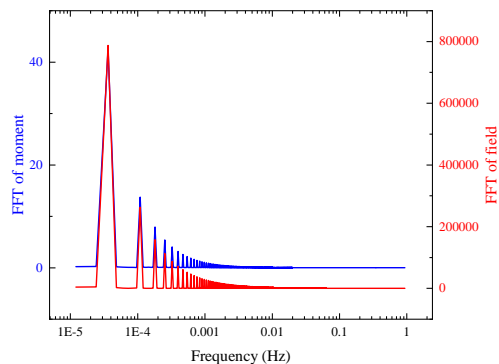

(b)  $36 \mu\text{Hz FFT}$

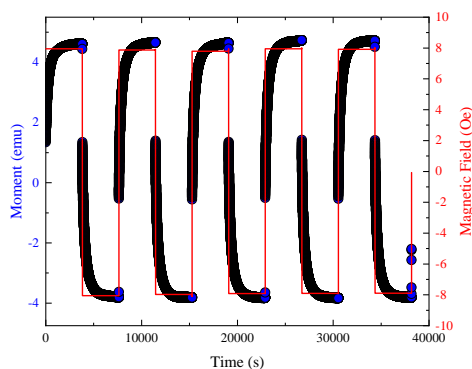

(c)  $0.13 \text{ mHz } M(t)$  data

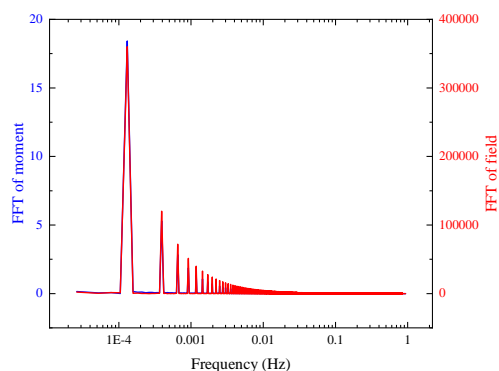

(d)  $0.13 \text{ mHz FFT}$

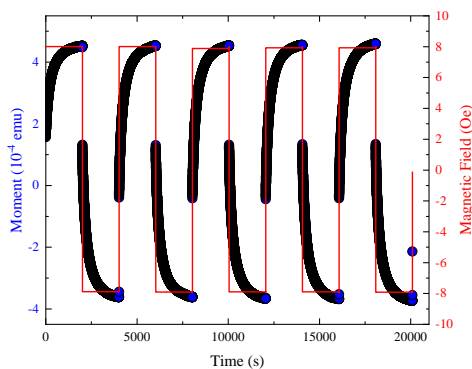

(e)  $0.25 \text{ mHz } M(t)$  data

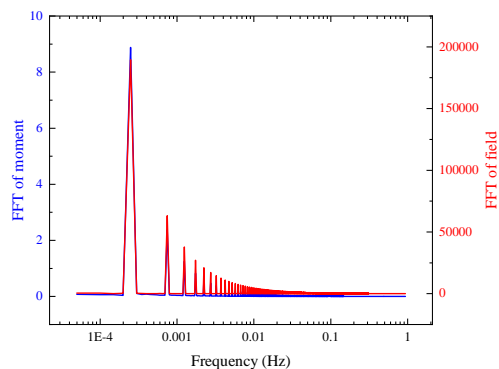

(f)  $0.25 \text{ mHz FFT}$

Figure S4: Waveform measurements performed in zero-field at 4 K (left column) with associated Fast Fourier Transforms (FFT - right column)

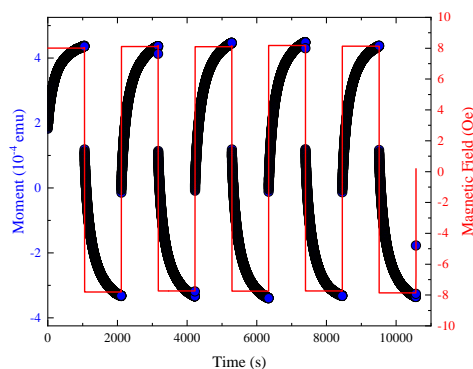

(a) 0.47 MHz  $M(t)$  data

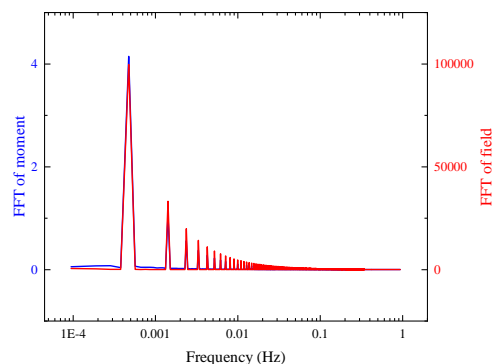

(b) 0.47 MHz FFT

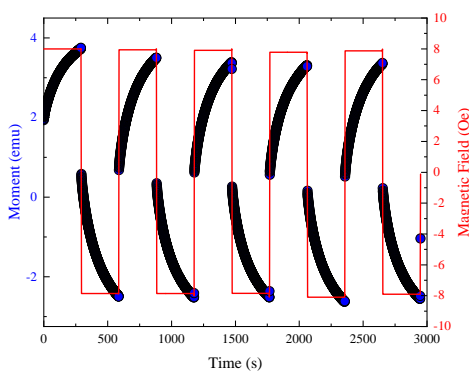

(c) 1.7 MHz  $M(t)$  data

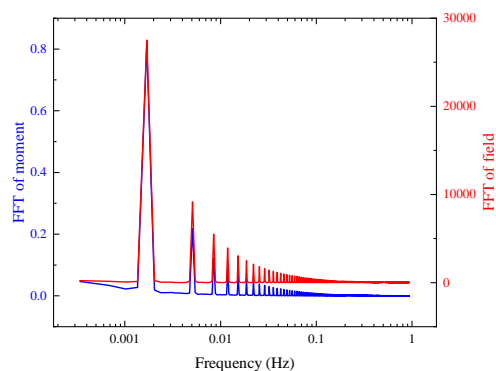

(d) 1.7 MHz FFT

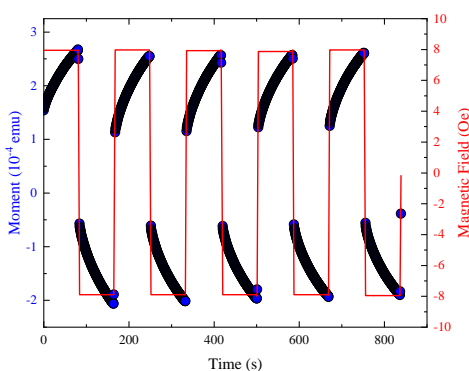

(e) 6.2 MHz  $M(t)$  data

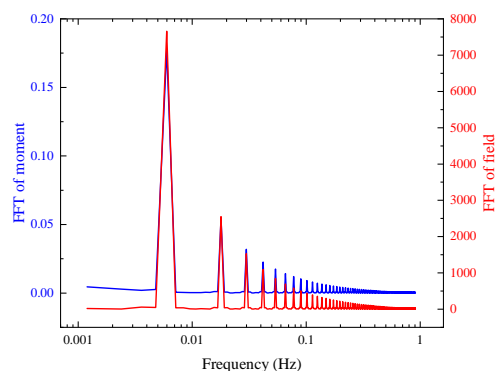

(f) 6.2 MHz FFT

Figure S5: Waveform measurements performed in zero-field at 4 K (left column) with associated Fast Fourier Transforms (FFT - right column)

### S1.3 6 K Data

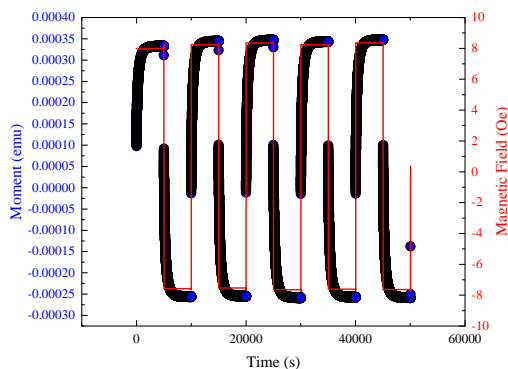

(a) 0.1 mHz  $M(t)$  data

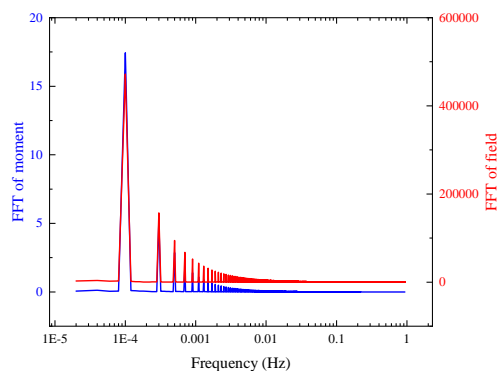

(b) 0.1 mHz FFT

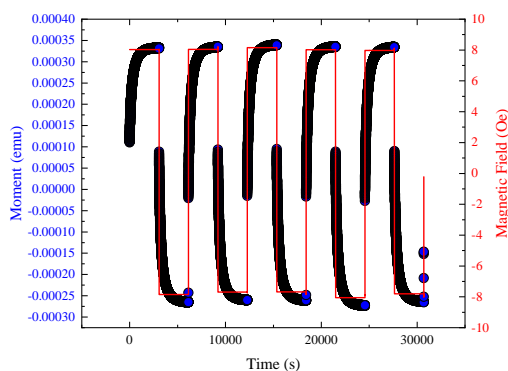

(c) 0.16 mHz  $M(t)$  data

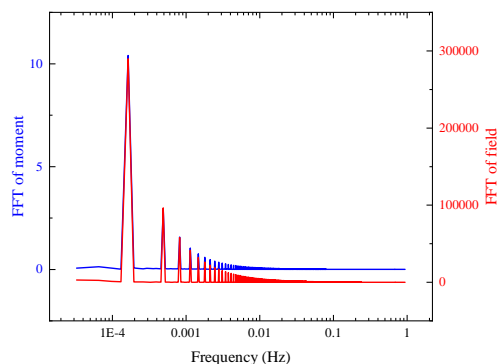

(d) 0.16 mHz FFT

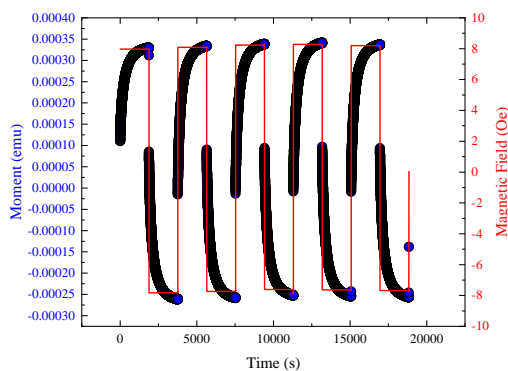

(e) 0.27 mHz  $M(t)$  data

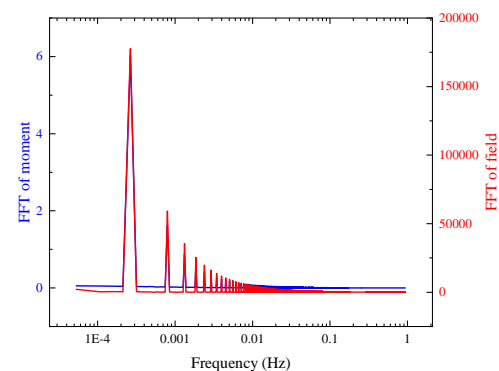

(f) 0.27 mHz FFT

Figure S6: Waveform measurements performed in zero-field at 6 K (left column) with associated Fast Fourier Transforms (FFT - right column)

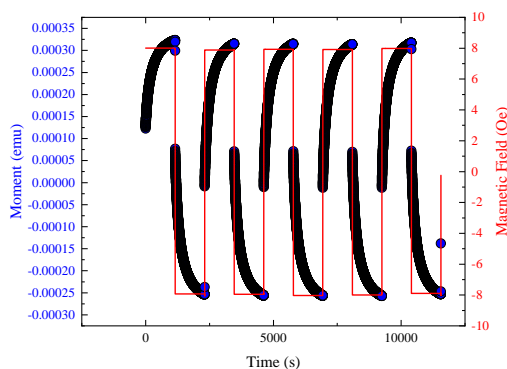

(a) 0.43 MHz  $M(t)$  data

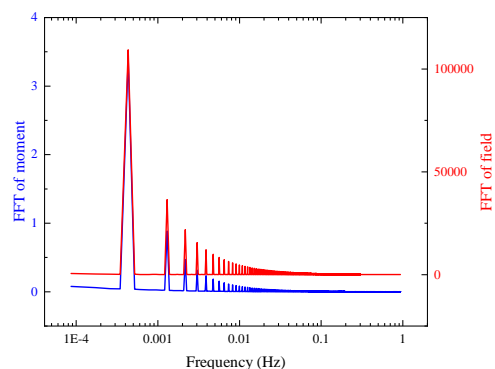

(b) 0.43 MHz FFT

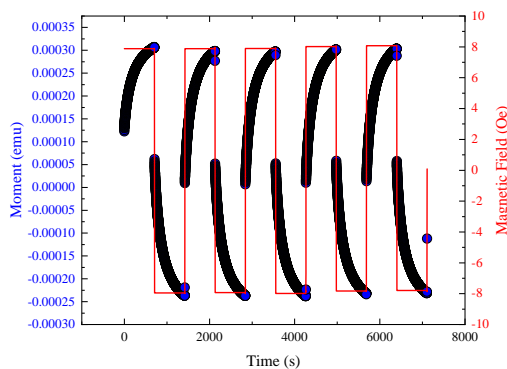

(c) 0.7 MHz  $M(t)$  data

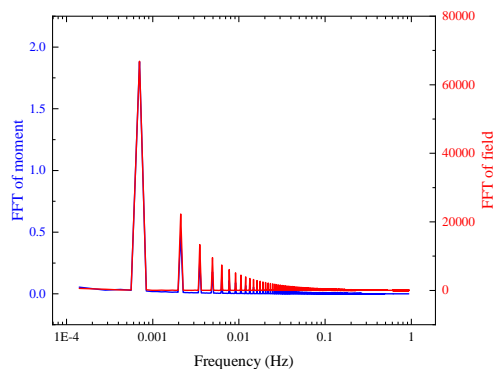

(d) 0.7 MHz FFT

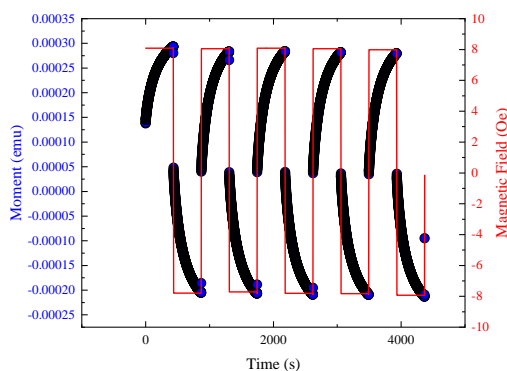

(e) 1.1 MHz  $M(t)$  data

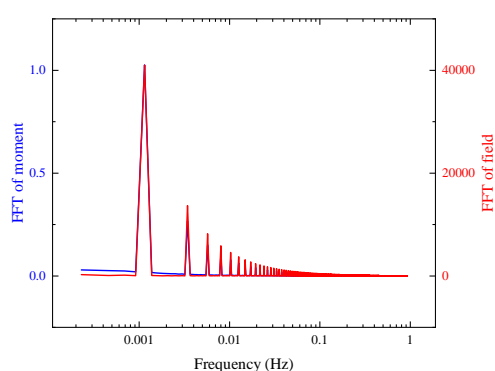

(f) 1.1 MHz FFT

Figure S7: Waveform measurements performed in zero-field at 6 K (left column) with associated Fast Fourier Transforms (FFT - right column)

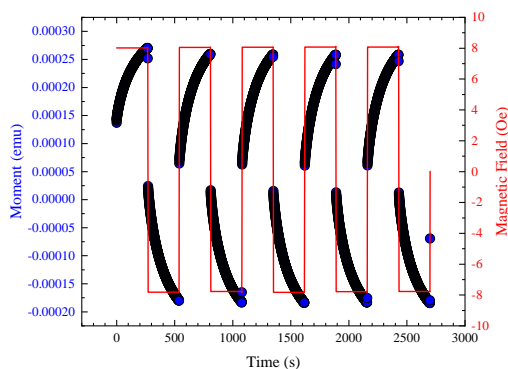

(a) 1.9 MHz  $M(t)$  data

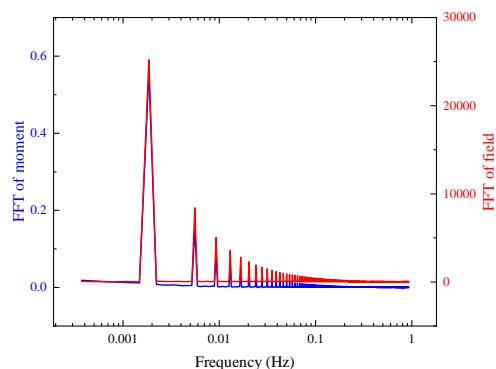

(b) 1.9 MHz FFT

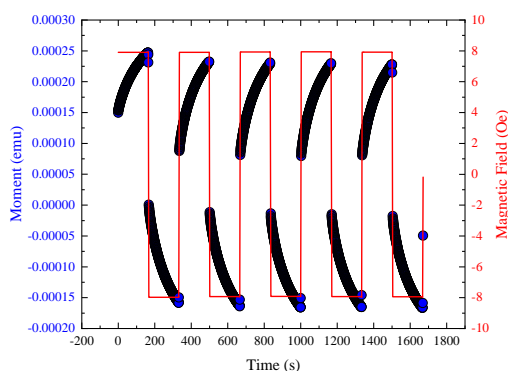

(c) 3 MHz  $M(t)$  data

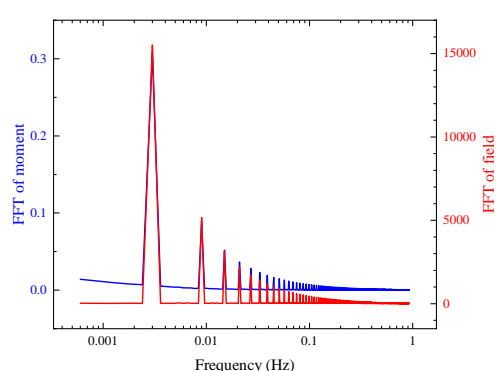

(d) 3 MHz FFT

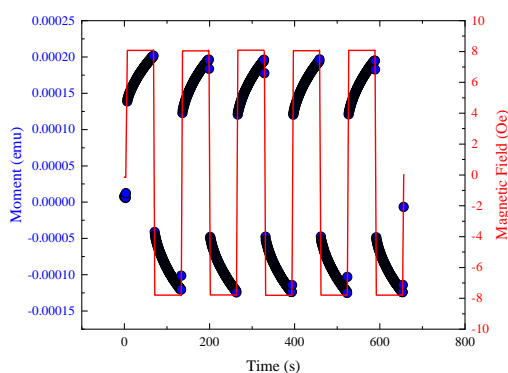

(e) 6 MHz  $M(t)$  data

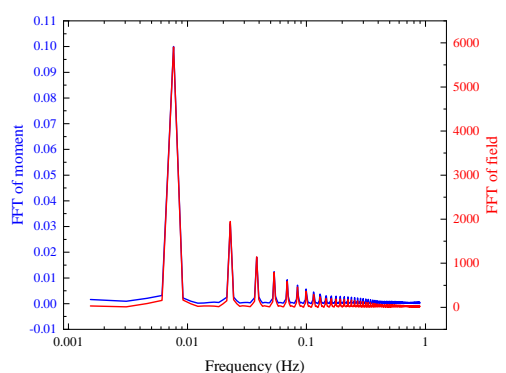

(f) 6 MHz FFT

Figure S8: Waveform measurements performed in zero-field at 6 K (left column) with associated Fast Fourier Transforms (FFT - right column)



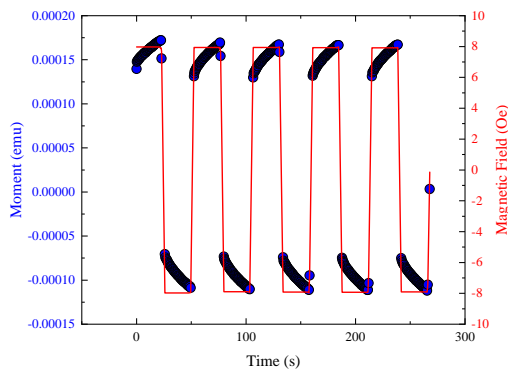

(a) 22 MHz  $M(t)$  data

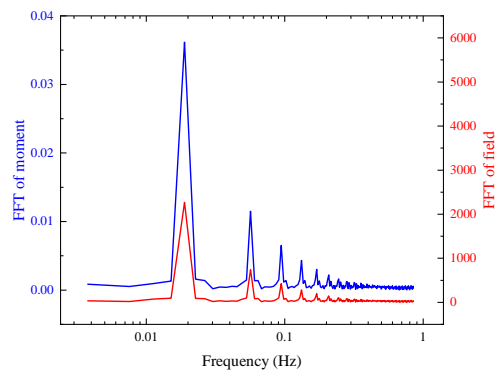

(b) 22 MHz FFT

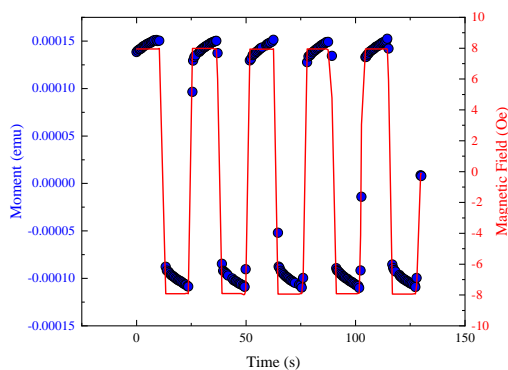

(c) 58 MHz  $M(t)$  data

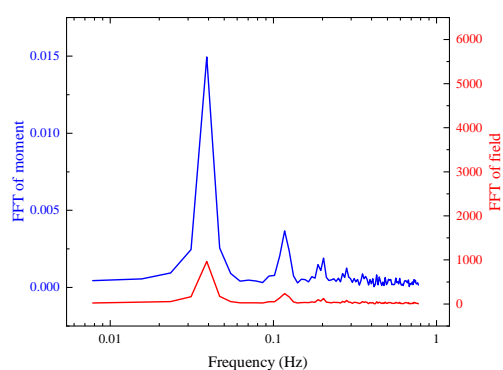

(d) 58 MHz FFT

Figure S9: Waveform measurements performed in zero-field at 6 K (left column) with associated Fast Fourier Transforms (FFT - right column)

## S1.4 9 K Data

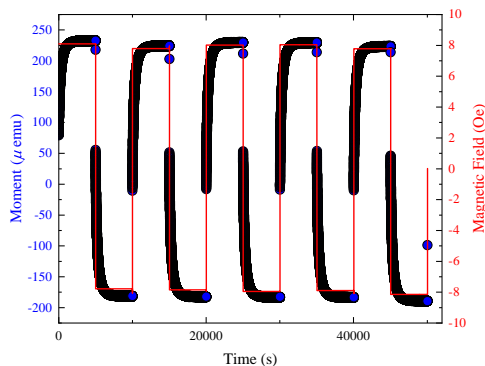

(a) 0.1 mHz  $M(t)$  data

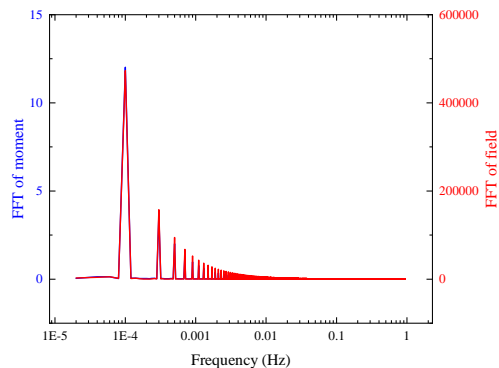

(b) 0.1 mHz FFT

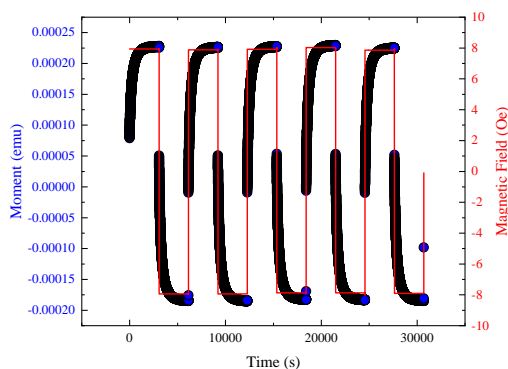

(c) 0.16 mHz  $M(t)$  data

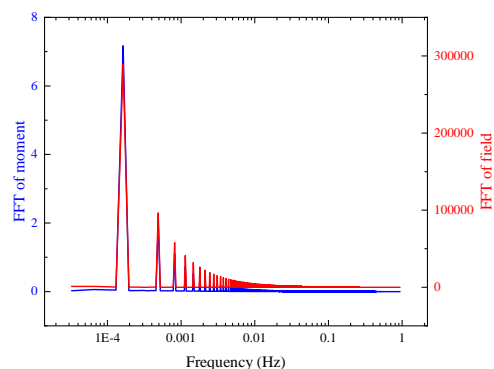

(d) 0.16 mHz FFT

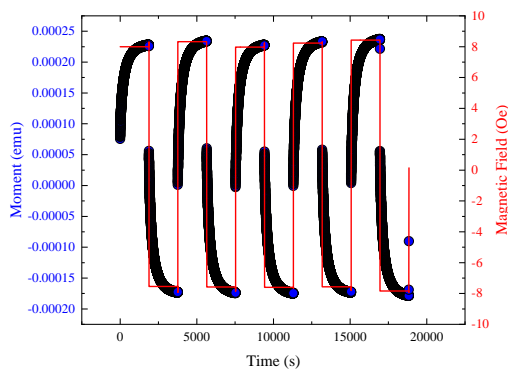

(e) 0.27 mHz  $M(t)$  data

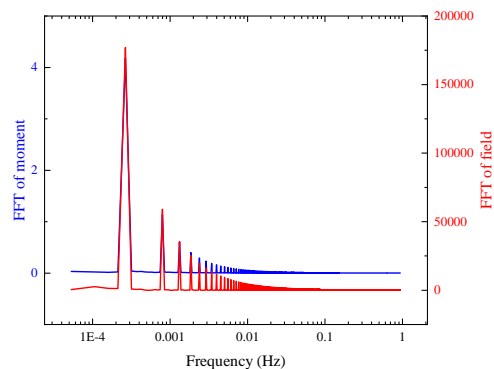

(f) 0.27 mHz FFT

Figure S10: Waveform measurements performed in zero-field at 9 K (left column) with associated Fast Fourier Transforms (FFT - right column)

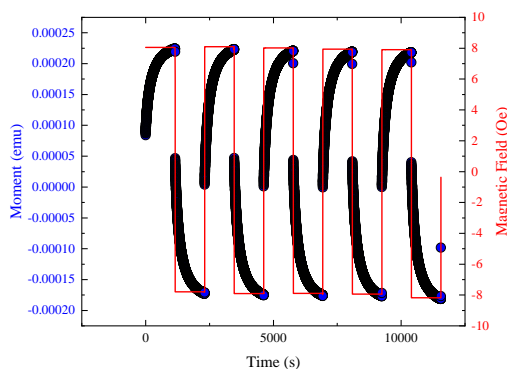

(a) 0.43 MHz  $M(t)$  data

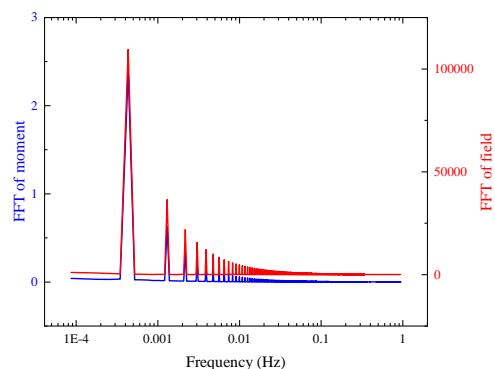

(b) 0.43 MHz FFT

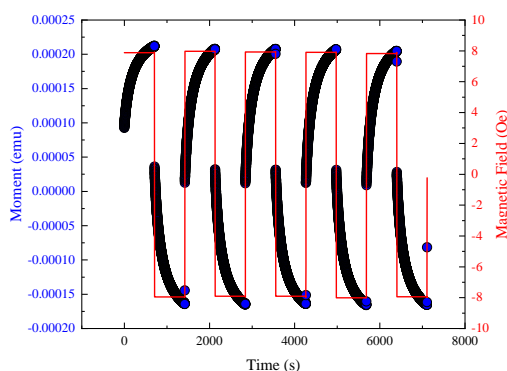

(c) 0.7 MHz  $M(t)$  data

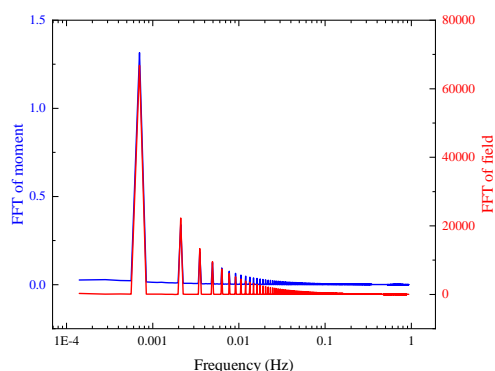

(d) 0.7 MHz FFT

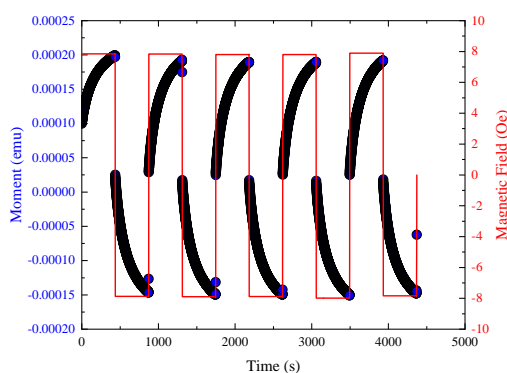

(e) 1.1 MHz  $M(t)$  data

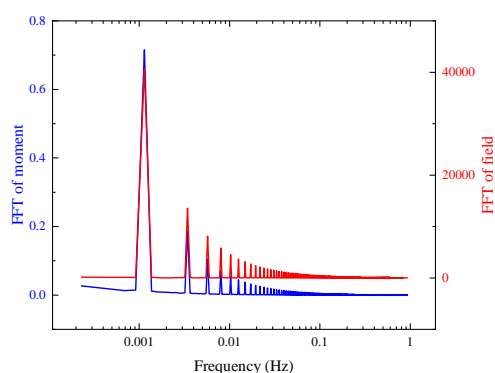

(f) 1.1 MHz FFT

Figure S11: Waveform measurements performed in zero-field at 9 K (left column) with associated Fast Fourier Transforms (FFT - right column)

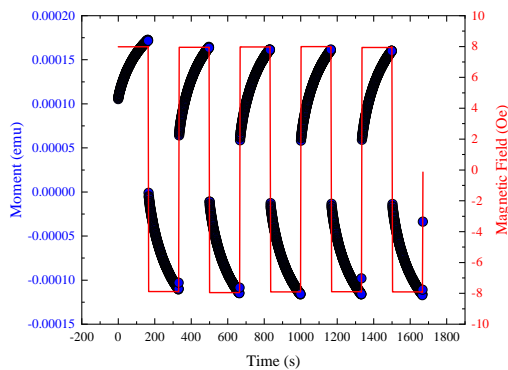

(a) 3 mHz  $M(t)$  data

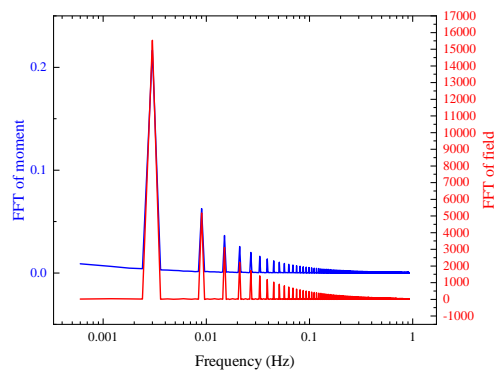

(b) 3 mHz FFT

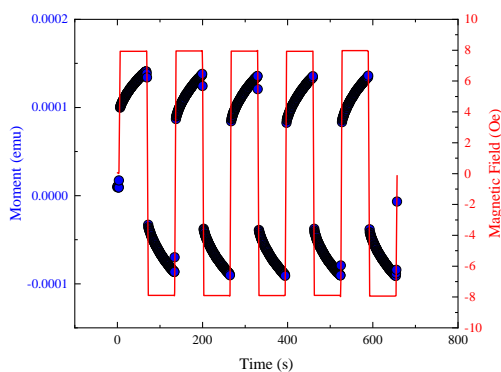

(c) 8 mHz  $M(t)$  data

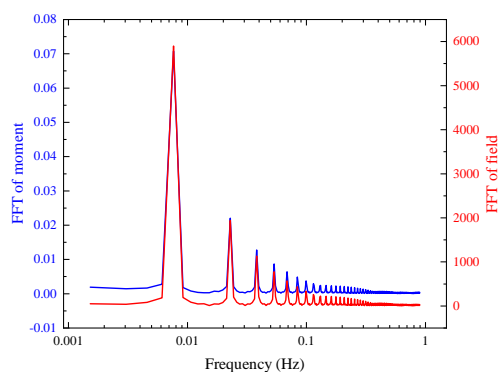

(d) 8 mHz FFT

Figure S12: Waveform measurements performed in zero-field at 9 K (left column) with associated Fast Fourier Transforms (FFT - right column)

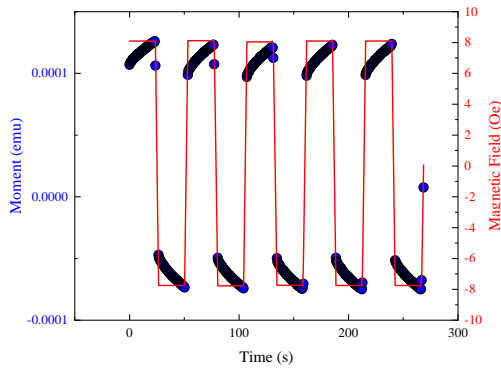

(a) 22 MHz  $M(t)$  data

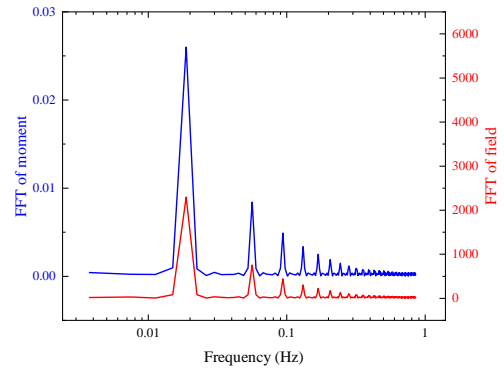

(b) 22 MHz FFT

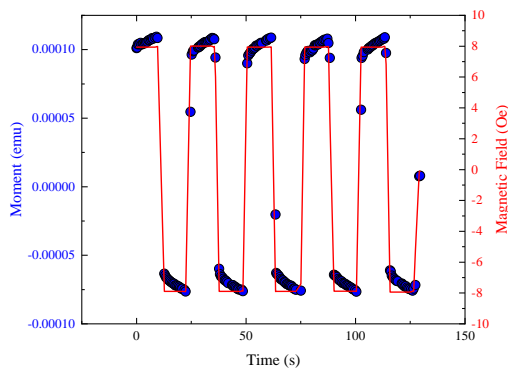

(c) 58 MHz  $M(t)$  data

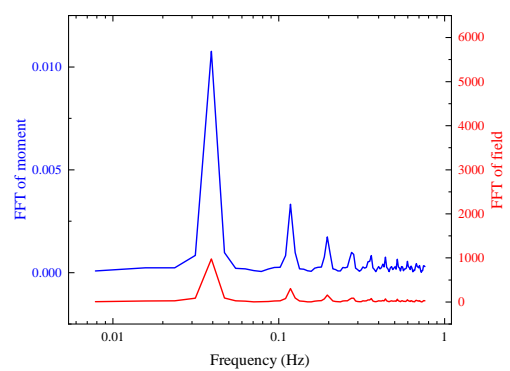

(d) 58 MHz FFT

Figure S13: Waveform measurements performed in zero-field at 9 K (left column) with associated Fast Fourier Transforms (FFT - right column)

## S1.5 13 K Data

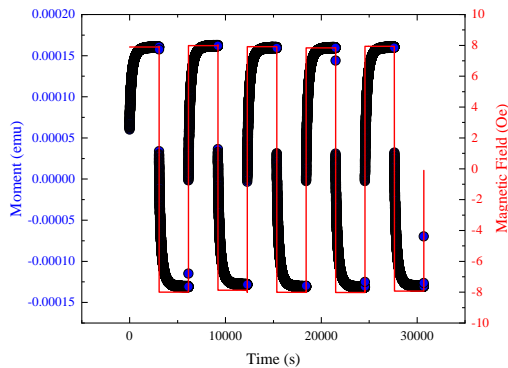

(a) 0.16 mHz  $M(t)$  data

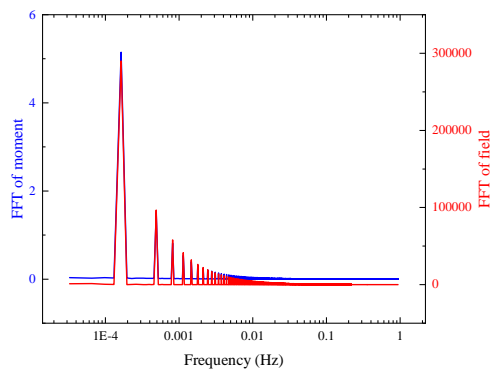

(b) 0.16 mHz FFT

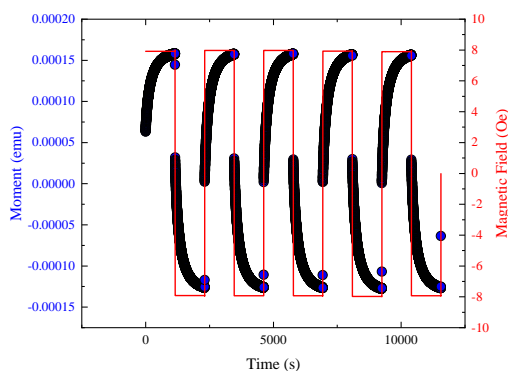

(c) 0.43 mHz  $M(t)$  data

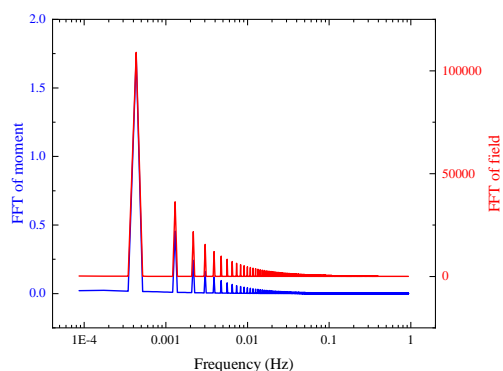

(d) 0.43 mHz FFT

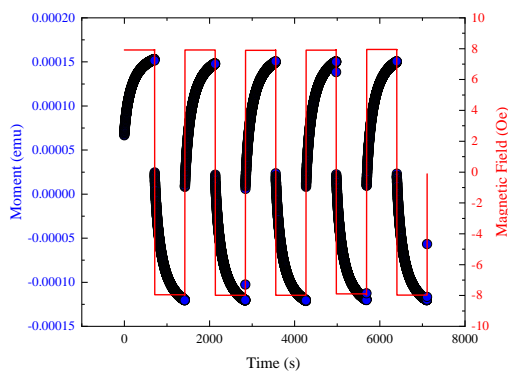

(e) 0.7 mHz  $M(t)$  data

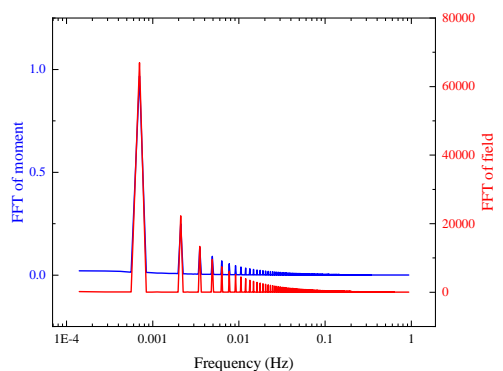

(f) 0.7 mHz FFT

Figure S14: Waveform measurements performed in zero-field at 13 K (left column) with associated Fast Fourier Transforms (FFT - right column)

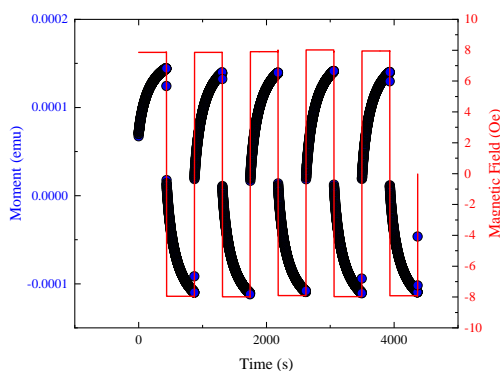

(a) 1.1 MHz  $M(t)$  data

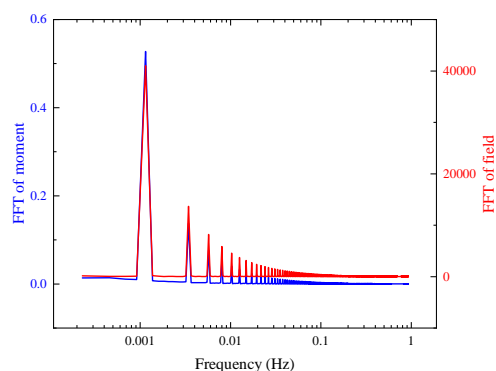

(b) 1.1 MHz FFT

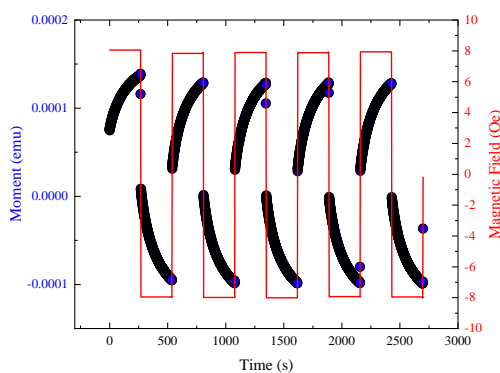

(c) 1.9 MHz  $M(t)$  data

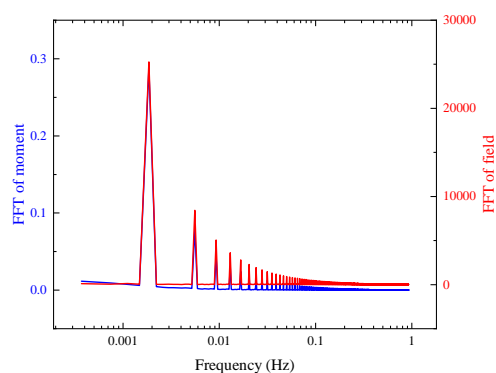

(d) 1.9 MHz FFT

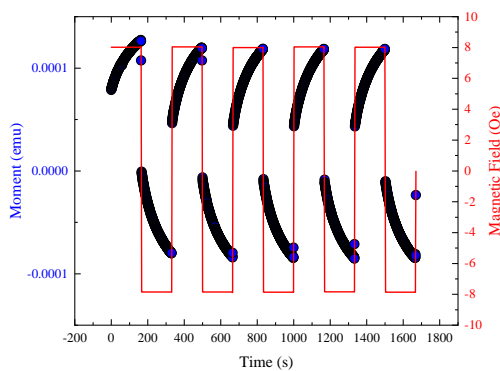

(e) 3 MHz  $M(t)$  data

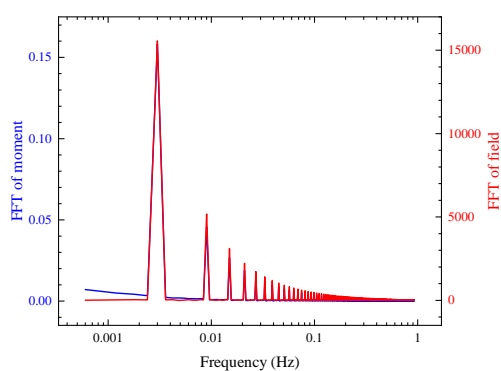

(f) 3 MHz FFT

Figure S15: Waveform measurements performed in zero-field at 13 K (left column) with associated Fast Fourier Transforms (FFT - right column)

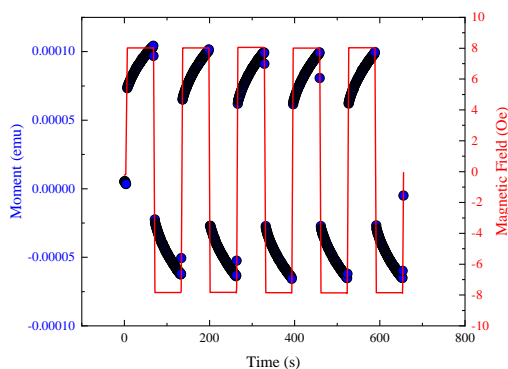

(a) 8 mHz  $M(t)$  data

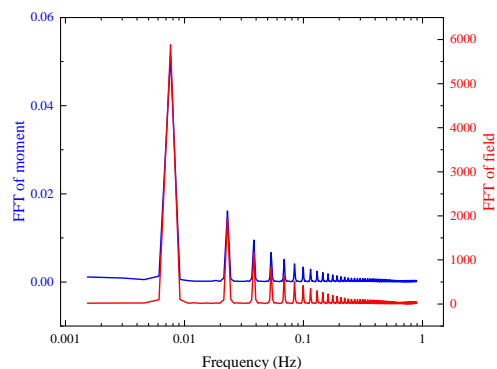

(b) 8 mHz FFT

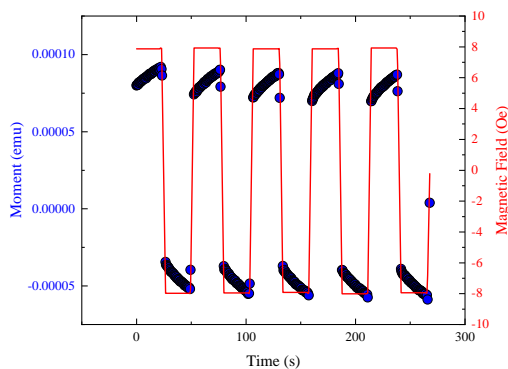

(c) 22 mHz  $M(t)$  data

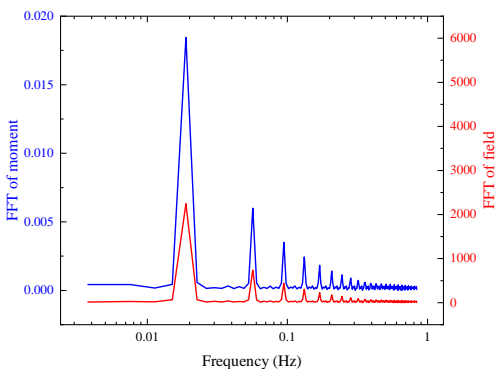

(d) 22 mHz FFT

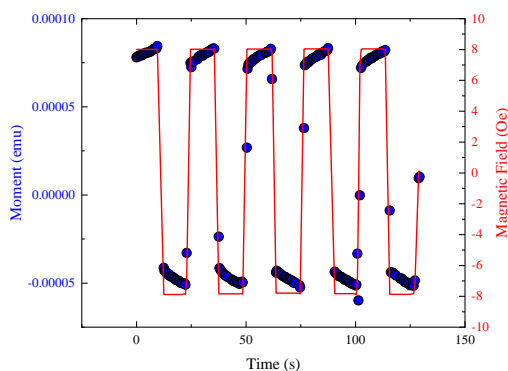

(e) 58 mHz  $M(t)$  data

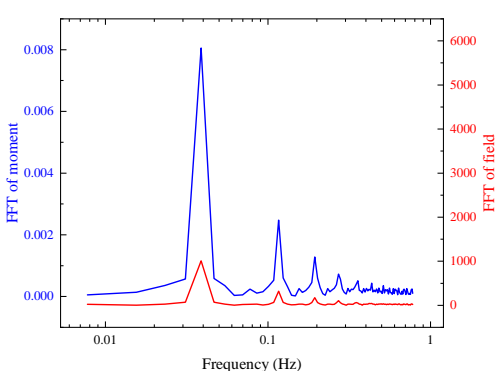

(f) 58 mHz FFT

Figure S16: Waveform measurements performed in zero-field at 13 K (left column) with associated Fast Fourier Transforms (FFT - right column)



## S1.6 16 K Data

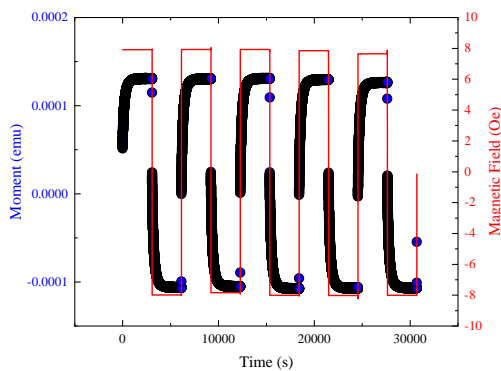

(a) 0.16 mHz  $M(t)$  data

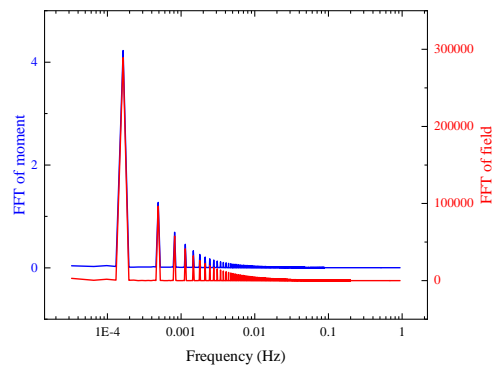

(b) 0.16 mHz FFT

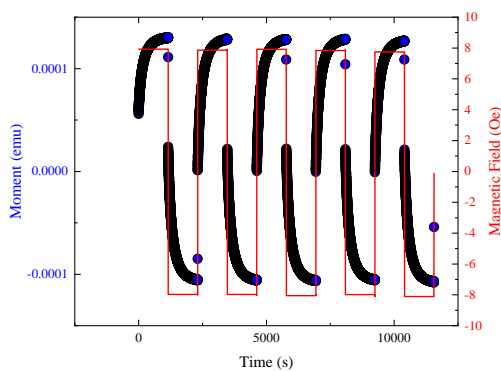

(c) 0.43 mHz  $M(t)$  data

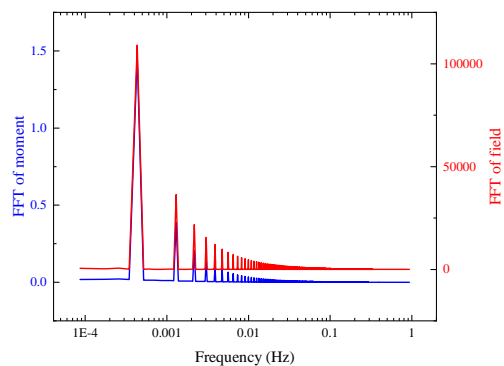

(d) 0.43 mHz FFT

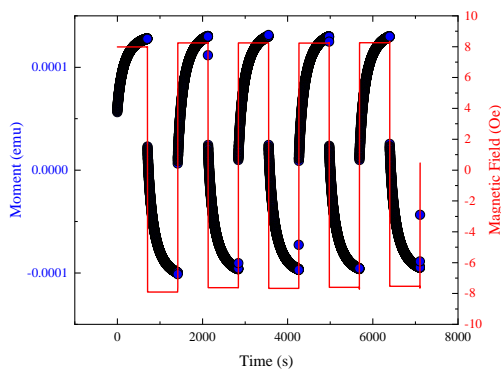

(e) 0.7 mHz  $M(t)$  data

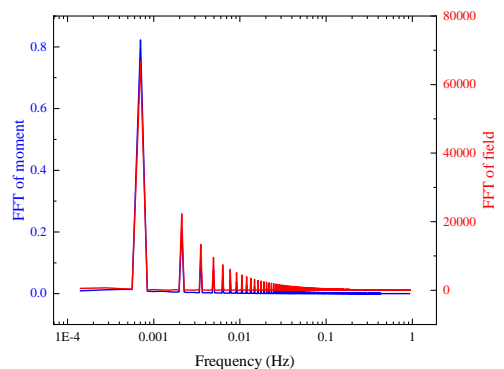

(f) 0.7 mHz FFT

Figure S17: Waveform measurements performed in zero-field at 16 K (left column) with associated Fast Fourier Transforms (FFT - right column)

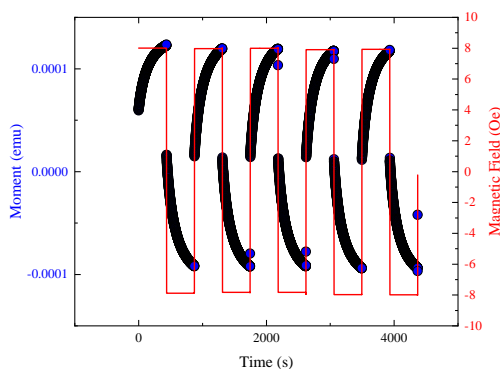

(a) 1.1 MHz  $M(t)$  data

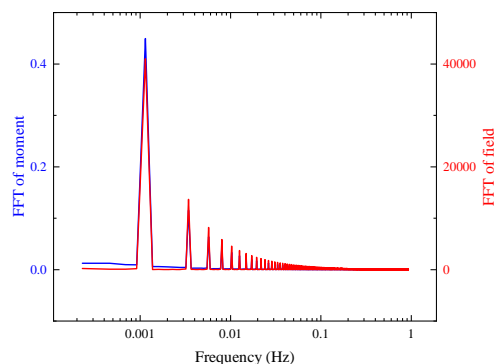

(b) 1.1 MHz FFT

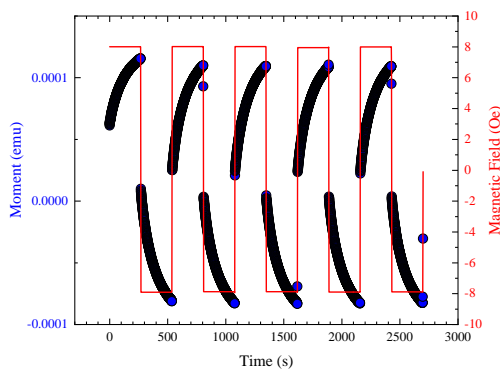

(c) 1.9 MHz  $M(t)$  data

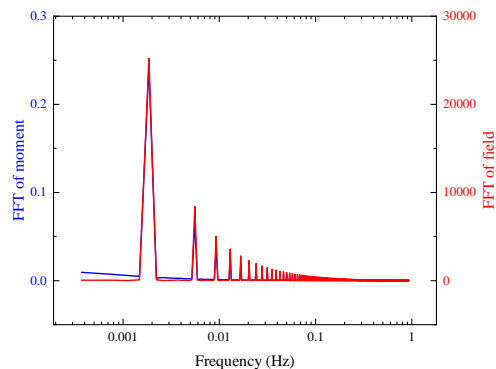

(d) 1.9 MHz FFT

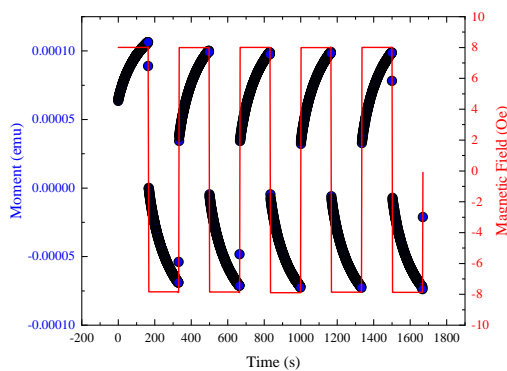

(e) 3 MHz  $M(t)$  data

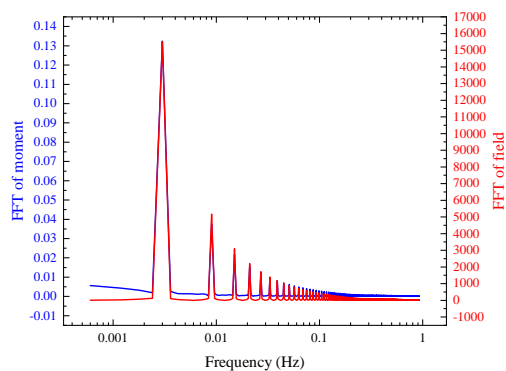

(f) 3 MHz FFT

Figure S18: Waveform measurements performed in zero-field at 16 K (left column) with associated Fast Fourier Transforms (FFT - right column)

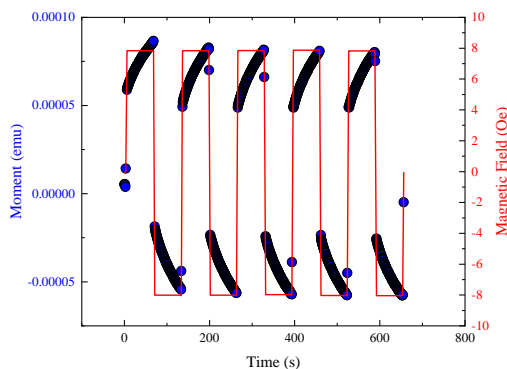

(a) 8 mHz  $M(t)$  data

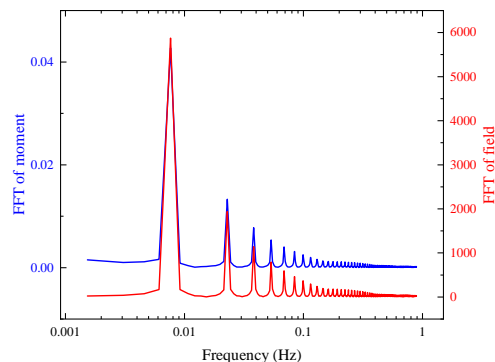

(b) 8 mHz FFT

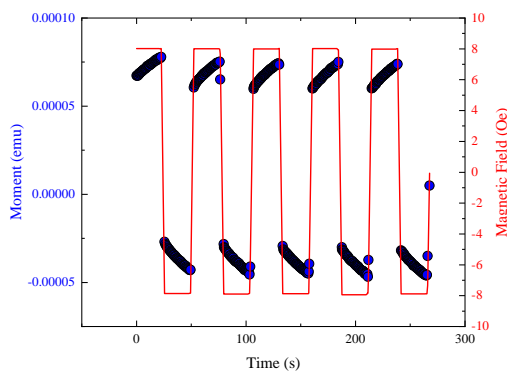

(c) 22 mHz  $M(t)$  data

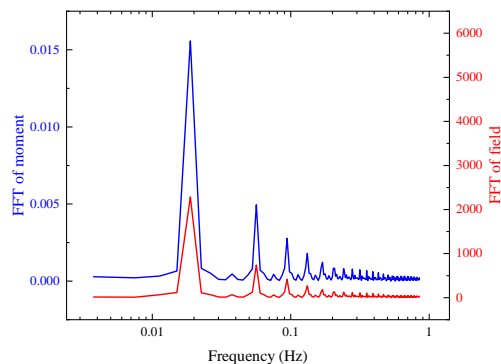

(d) 22 mHz FFT

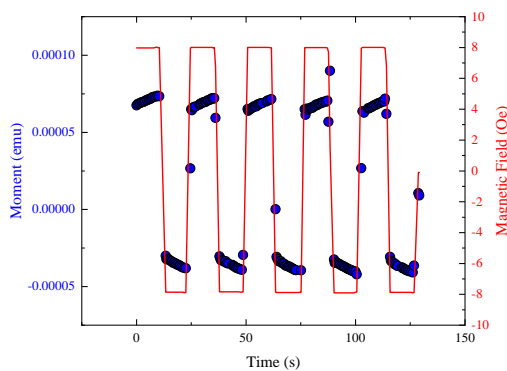

(e) 58 mHz  $M(t)$  data

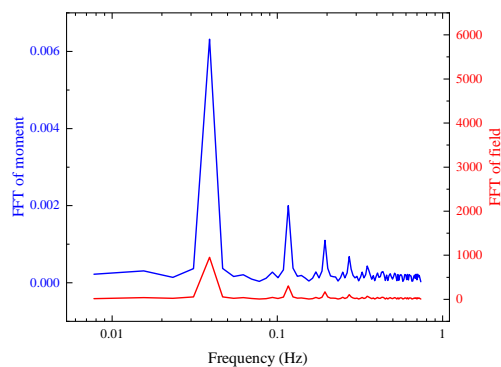

(f) 58 mHz FFT

Figure S19: Waveform measurements performed in zero-field at 16 K (left column) with associated Fast Fourier Transforms (FFT - right column)

## S1.7 20 K Data

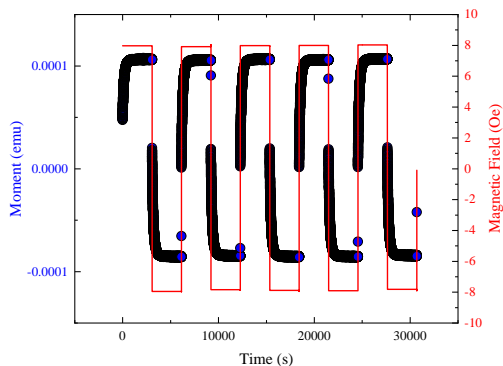

(a) 0.16 mHz  $M(t)$  data

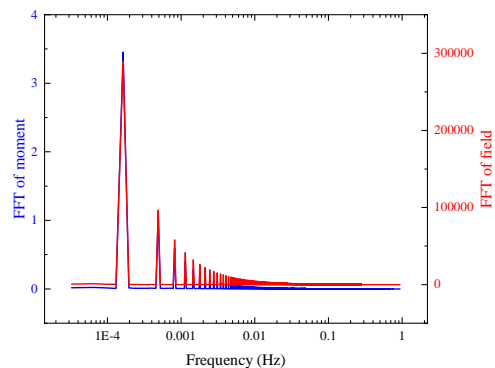

(b) 0.16 mHz FFT

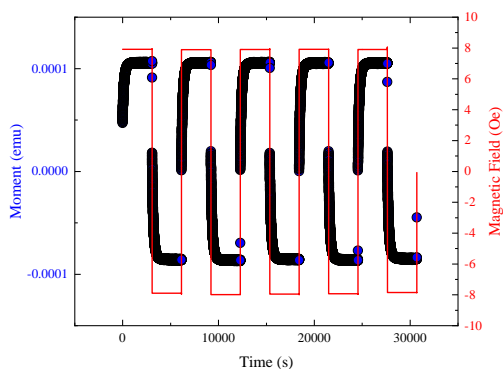

(c) 0.16 mHz  $M(t)$  data

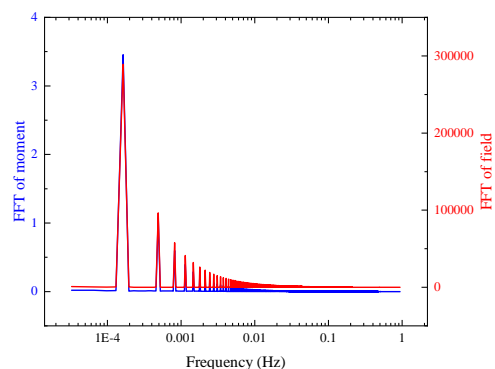

(d) 0.16 mHz FFT

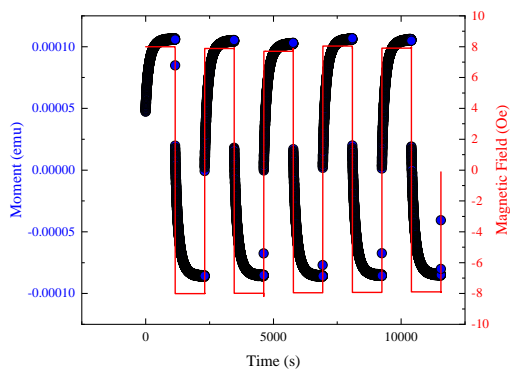

(e) 0.43 mHz  $M(t)$  data

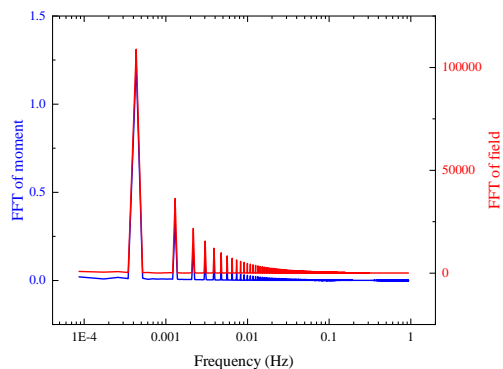

(f) 0.43 mHz FFT

Figure S20: Waveform measurements performed in zero-field at 20 K (left column) with associated Fast Fourier Transforms (FFT - right column). Two data sets were collected at this temperature, some frequencies appear twice.

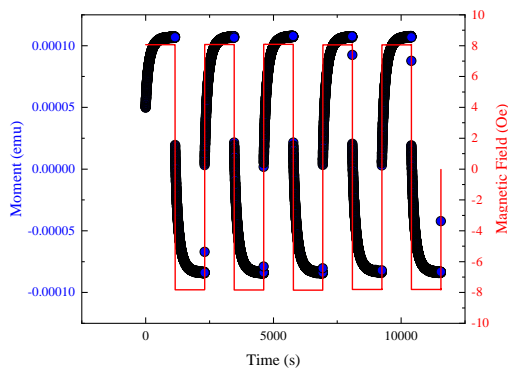

(a) 0.43 mHz  $M(t)$  data

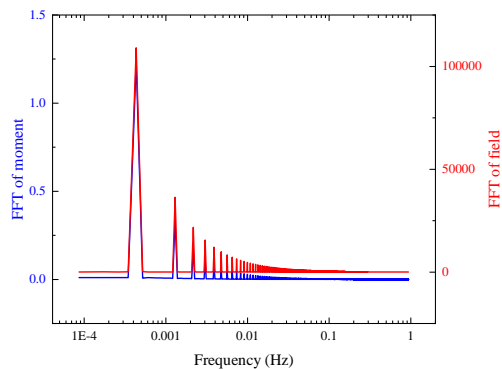

(b) 0.43 mHz FFT

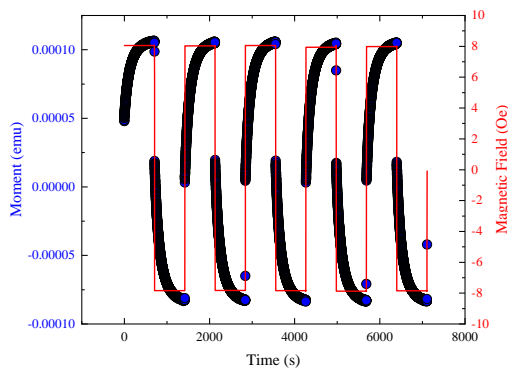

(c) 0.7 mHz  $M(t)$  data

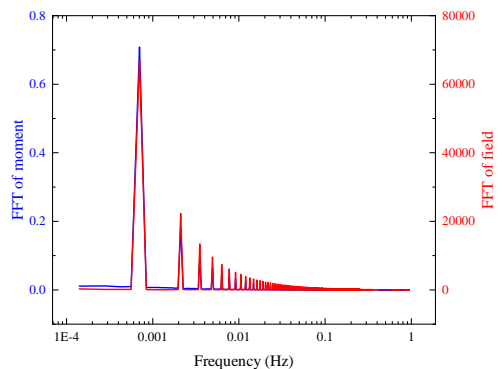

(d) 0.7 mHz FFT

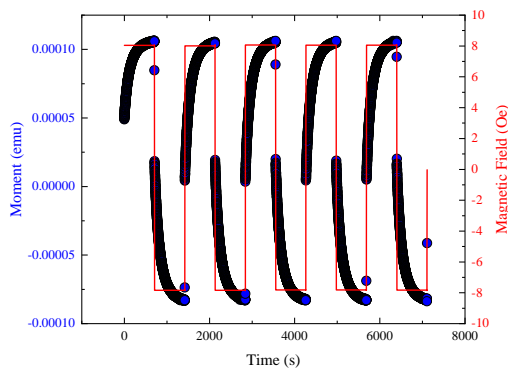

(e) 0.7 mHz  $M(t)$  data

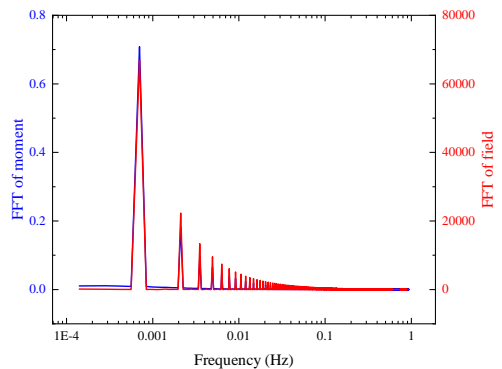

(f) 0.7 mHz FFT

Figure S21: Waveform measurements performed in zero-field at 20 K (left column) with associated Fast Fourier Transforms (FFT - right column). Two data sets were collected at this temperature, some frequencies appear twice.

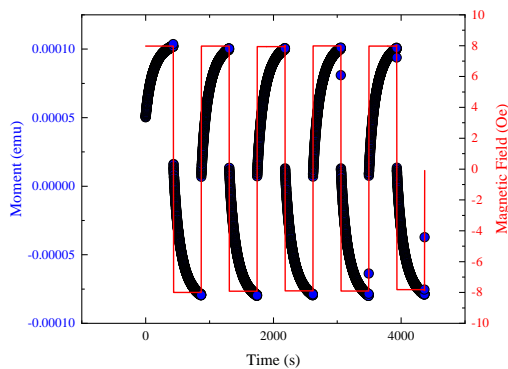

(a) 1.1 MHz  $M(t)$  data

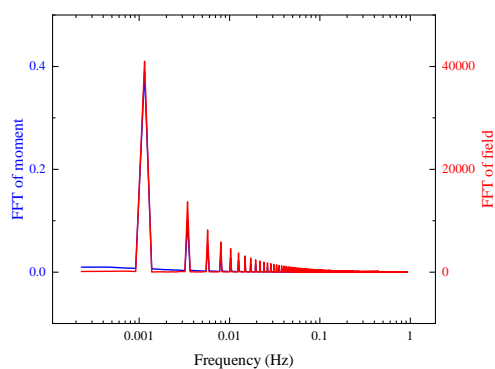

(b) 1.1 MHz FFT

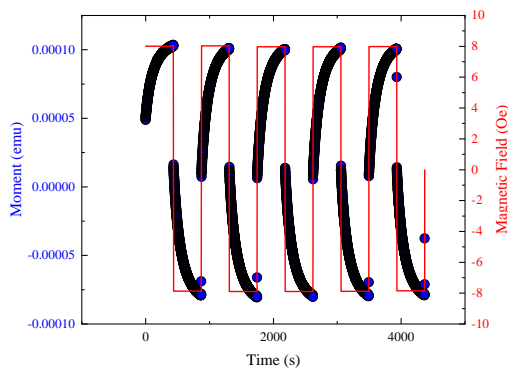

(c) 1.1 MHz  $M(t)$  data

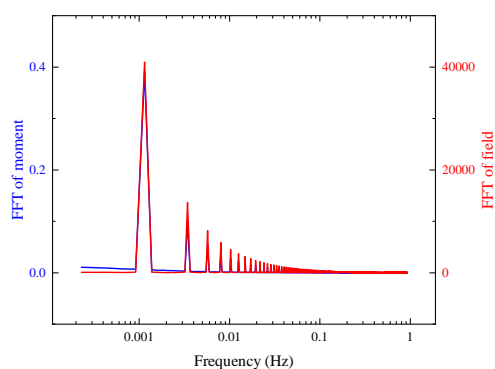

(d) 1.1 MHz FFT

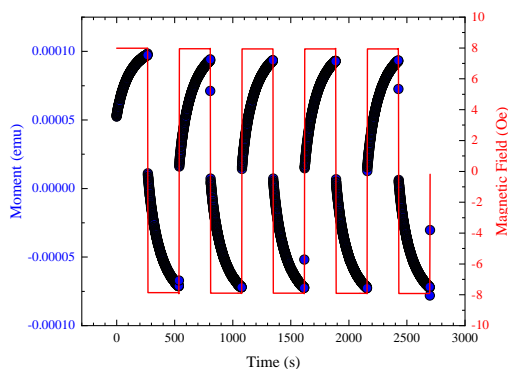

(e) 1.9 MHz  $M(t)$  data

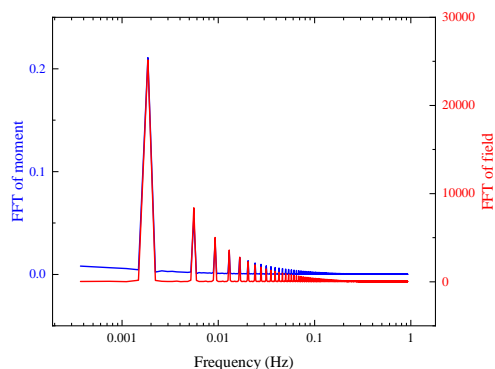

(f) 1.9 MHz FFT

Figure S22: Waveform measurements performed in zero-field at 20 K (left column) with associated Fast Fourier Transforms (FFT - right column). Two data sets were collected at this temperature, some frequencies appear twice.

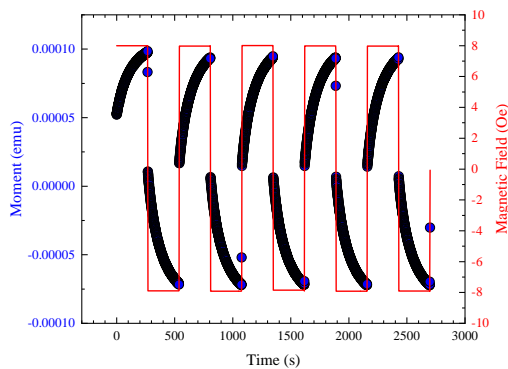

(a) 1.9 mHz  $M(t)$  data

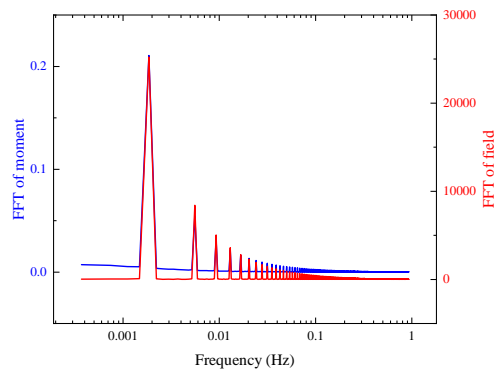

(b) 1.9 mHz FFT

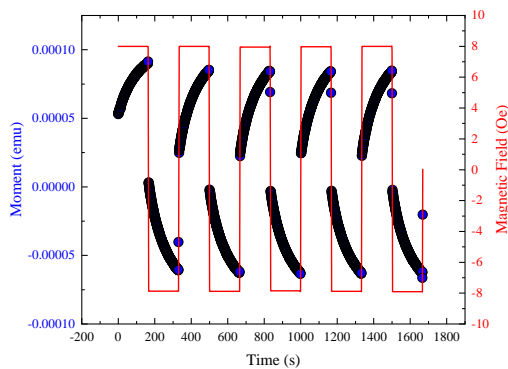

(c) 3 mHz  $M(t)$  data

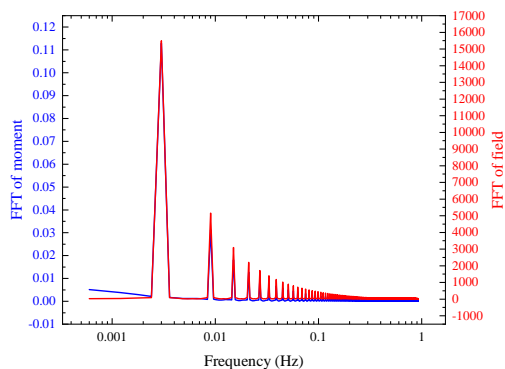

(d) 3 mHz FFT

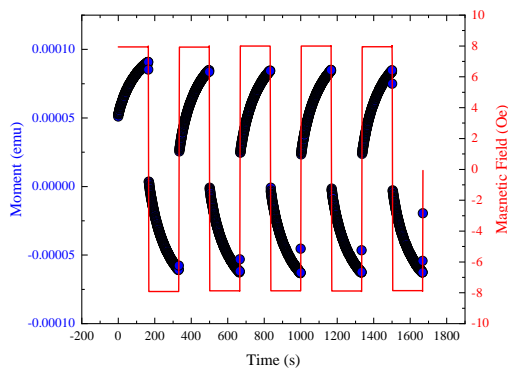

(e) 3 mHz  $M(t)$  data

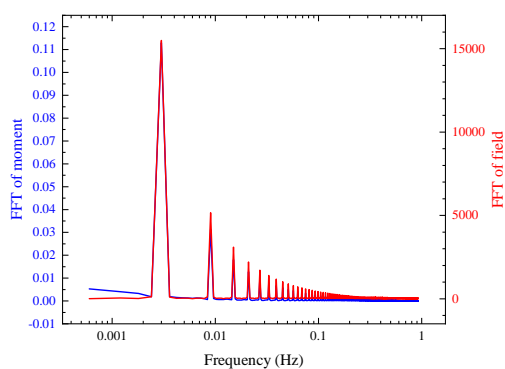

(f) 3 mHz FFT

Figure S23: Waveform measurements performed in zero-field at 20 K (left column) with associated Fast Fourier Transforms (FFT - right column). Two data sets were collected at this temperature, some frequencies appear twice.

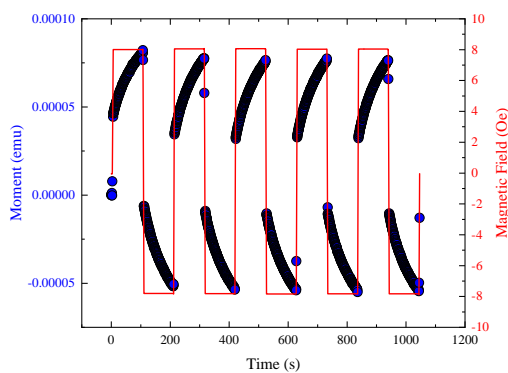

(a) 5 mHz  $M(t)$  data

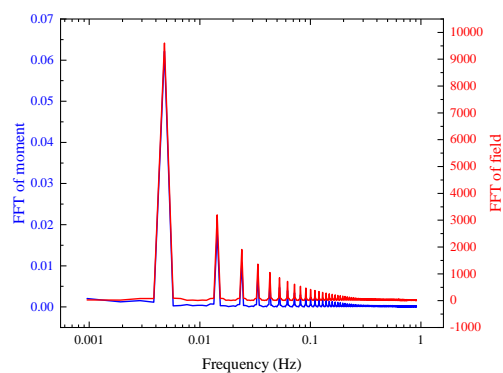

(b) 5 mHz FFT

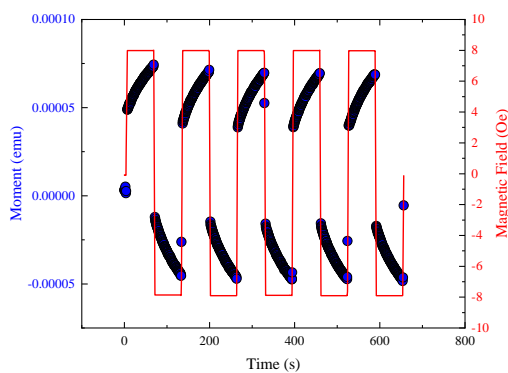

(c) 8 mHz  $M(t)$  data

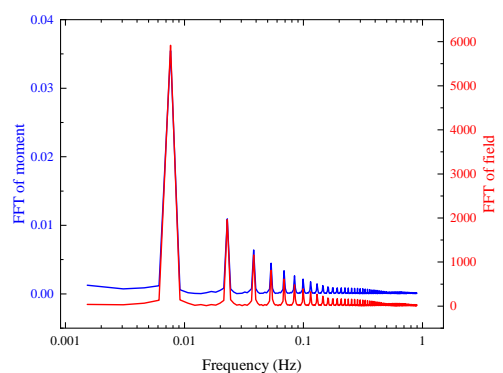

(d) 8 mHz FFT

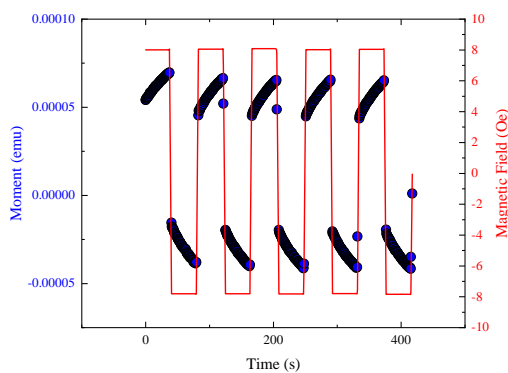

(e) 13 mHz  $M(t)$  data

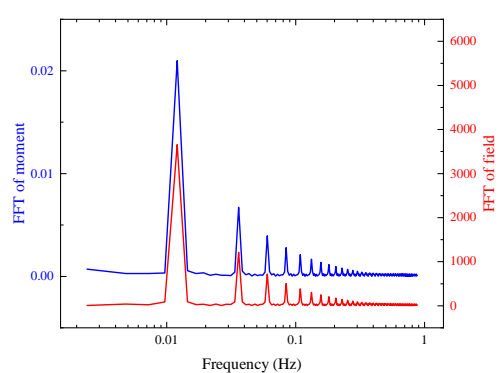

(f) 13 mHz FFT

Figure S24: Waveform measurements performed in zero-field at 20 K (left column) with associated Fast Fourier Transforms (FFT - right column). Two data sets were collected at this temperature, some frequencies appear twice.



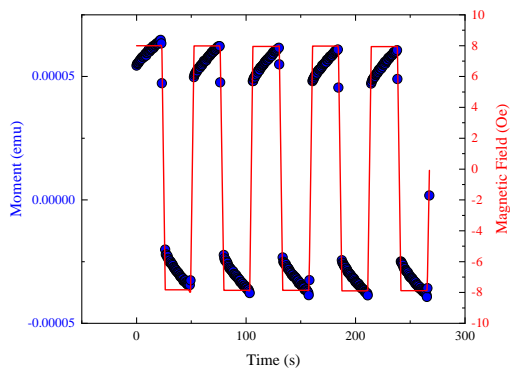

(a) 22 MHz  $M(t)$  data

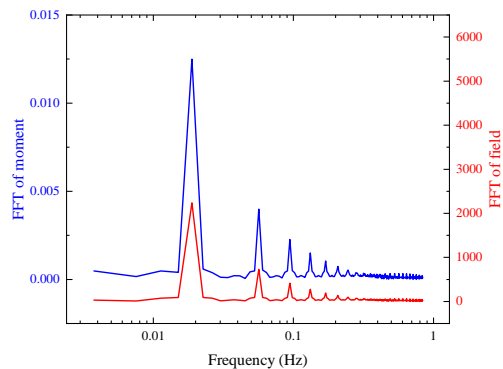

(b) 22 MHz FFT

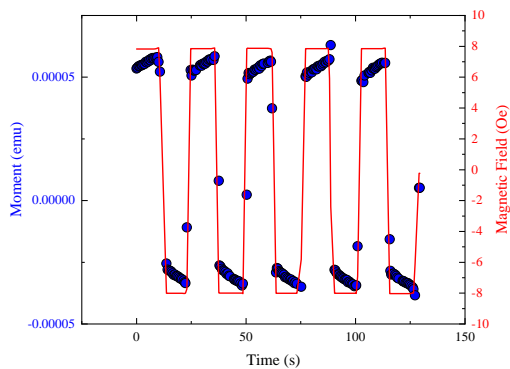

(c) 58 MHz  $M(t)$  data

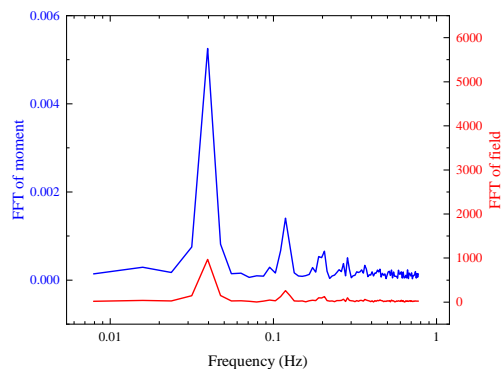

(d) 58 MHz FFT

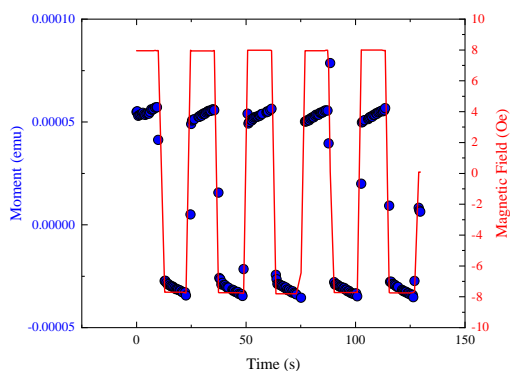

(e) 58 MHz  $M(t)$  data

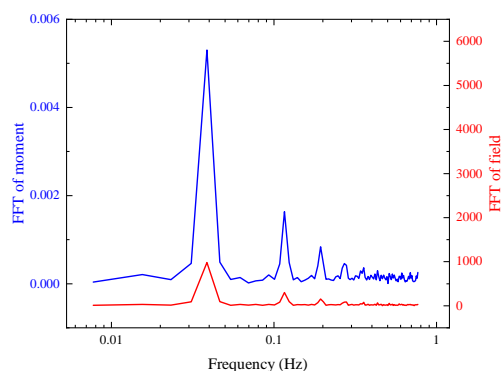

(f) 58 MHz FFT

Figure S25: Waveform measurements performed in zero-field at 20 K (left column) with associated Fast Fourier Transforms (FFT - right column). Two data sets were collected at this temperature, some frequencies appear twice.

## S1.8 23 K Data

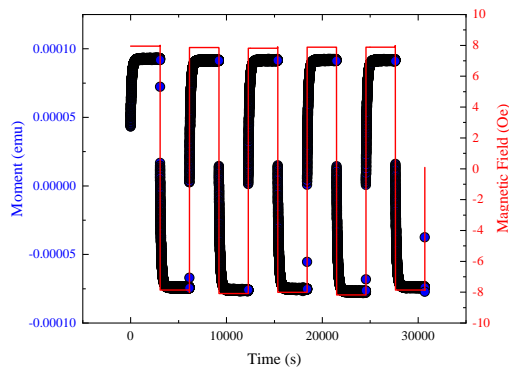

(a) 0.16 mHz  $M(t)$  data

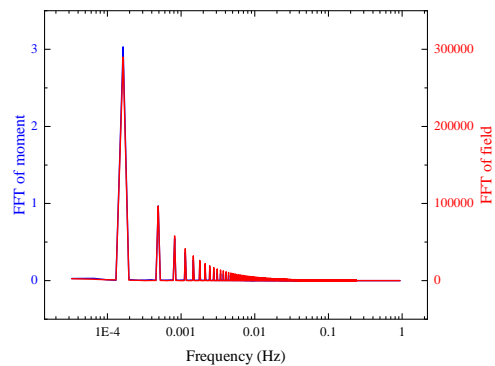

(b) 0.16 mHz FFT

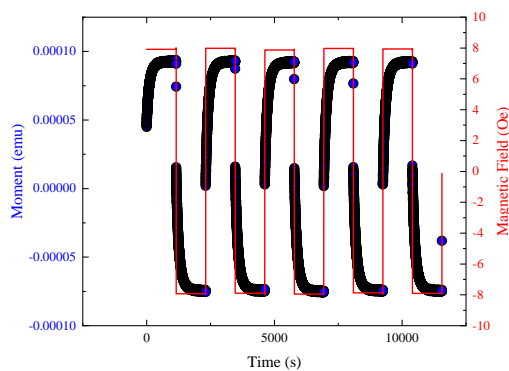

(c) 0.43 mHz  $M(t)$  data

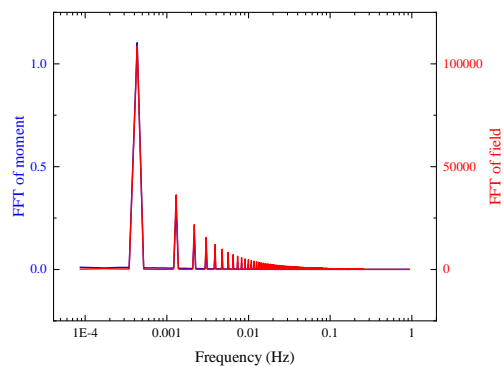

(d) 0.43 mHz FFT

Figure S26: Waveform measurements performed in zero-field at 23 K (left column) with associated Fast Fourier Transforms (FFT - right column)

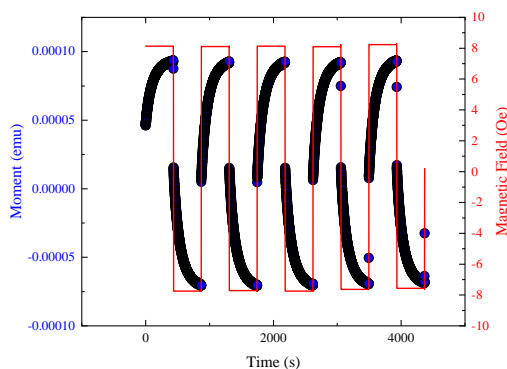

(a) 1.1 MHz  $M(t)$  data

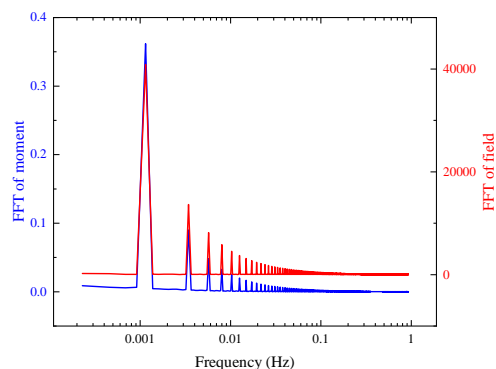

(b) 1.1 MHz FFT

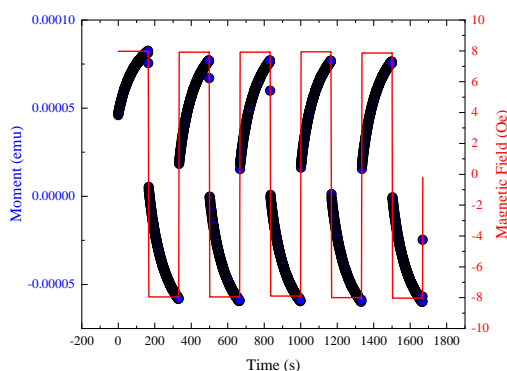

(c) 3 MHz  $M(t)$  data

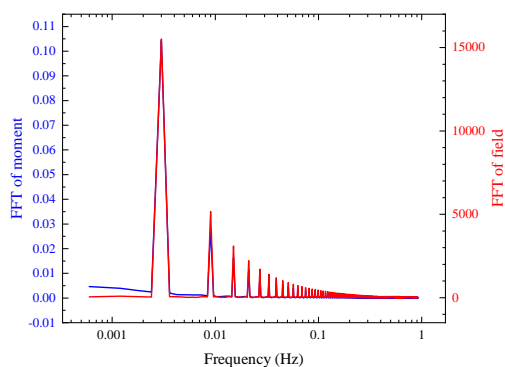

(d) 3 MHz FFT

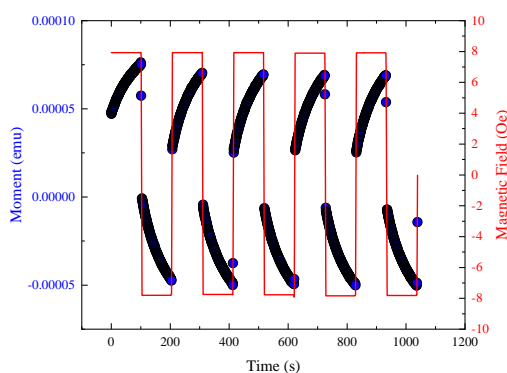

(e) 5 MHz  $M(t)$  data

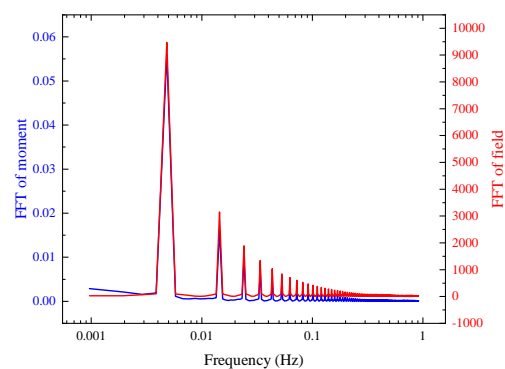

(f) 5 MHz FFT

Figure S27: Waveform measurements performed in zero-field at 23 K (left column) with associated Fast Fourier Transforms (FFT - right column)

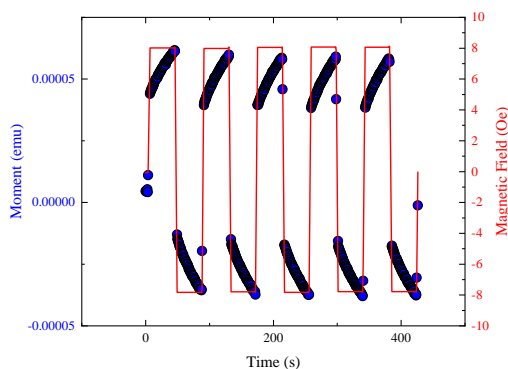

(a) 13 mHz  $M(t)$  data

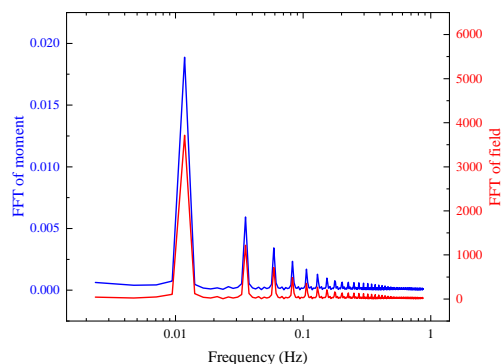

(b) 13 mHz FFT

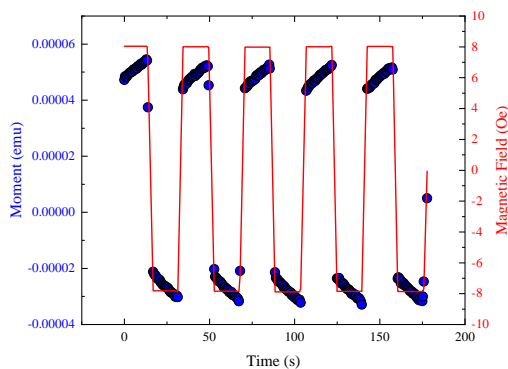

(c) 35 mHz  $M(t)$  data

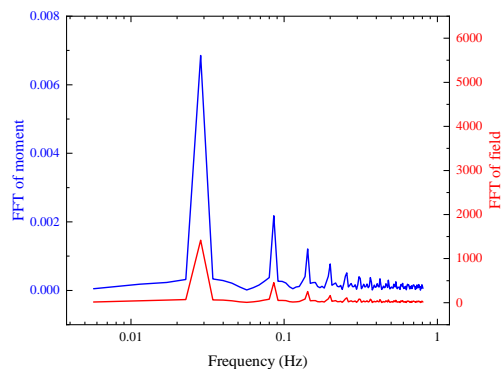

(d) 35 mHz FFT

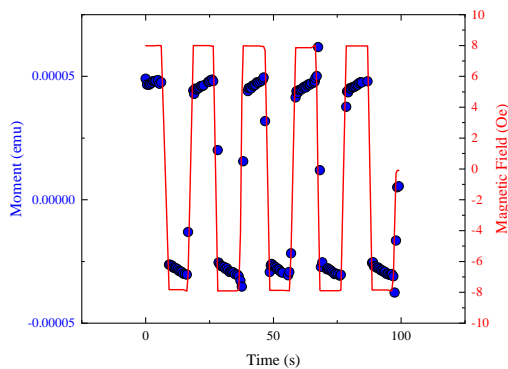

(e) 90 mHz  $M(t)$  data

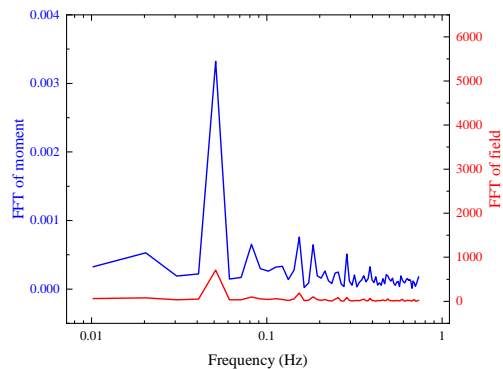

(f) 90 mHz FFT

Figure S28: Waveform measurements performed in zero-field at 23 K (left column) with associated Fast Fourier Transforms (FFT - right column)

## S1.9 Fitting to Generalised Debye model

Table S1: Frequencies, susceptibilities and phase angles extracted from Waveform measurements of  $[\text{Dy}(\text{Dtp})_2][\text{Al}\{\text{OC}(\text{CF}_3)_3\}_4]$  performed at 2 K

| Temperature (K) | Frequency (Hz)           | $\chi'$ ( $\text{cm}^3\text{mol}^{-1}$ ) | $\chi''$ ( $\text{cm}^3\text{mol}^{-1}$ ) | Phase (rad) |
|-----------------|--------------------------|------------------------------------------|-------------------------------------------|-------------|
| 2               | $3.61946 \times 10^{-5}$ | 4.35626                                  | 0.2539                                    | 0.05822     |
| 2               | $6.88534 \times 10^{-5}$ | 4.18119                                  | 0.4076                                    | 0.09718     |
| 2               | $1.3097 \times 10^{-4}$  | 4.21854                                  | 0.77515                                   | 0.18172     |
| 2               | $2.48917 \times 10^{-4}$ | 3.79159                                  | 1.03754                                   | 0.26711     |
| 2               | $4.72839 \times 10^{-4}$ | 3.27261                                  | 1.17157                                   | 0.34378     |
| 2               | 0.0017                   | 2.27579                                  | 0.75407                                   | 0.31996     |
| 2               | 0.00596                  | 1.89638                                  | 0.29457                                   | 0.1541      |

Table S2: Frequencies, susceptibilities and phase angles extracted from Waveform measurements of  $[\text{Dy}(\text{Dtp})_2][\text{Al}\{\text{OC}(\text{CF}_3)_3\}_4]$  performed at 4 K

| Temperature (K) | Frequency (Hz)           | $\chi'$ ( $\text{cm}^3\text{mol}^{-1}$ ) | $\chi''$ ( $\text{cm}^3\text{mol}^{-1}$ ) | Phase (rad) |
|-----------------|--------------------------|------------------------------------------|-------------------------------------------|-------------|
| 4               | $3.09846 \times 10^{-5}$ | 2.68838                                  | 0.08306                                   | 0.03088     |
| 4               | $1.30964 \times 10^{-4}$ | 2.53497                                  | 0.36025                                   | 0.14117     |
| 4               | $2.48868 \times 10^{-4}$ | 2.29104                                  | 0.49927                                   | 0.21457     |
| 4               | $4.73168 \times 10^{-4}$ | 2.00106                                  | 0.5736                                    | 0.27916     |
| 4               | 0.0017                   | 1.41082                                  | 0.46157                                   | 0.31619     |
| 4               | 0.00597                  | 1.13043                                  | 0.24849                                   | 0.21638     |

Table S3: Frequencies, susceptibilities and phase angles extracted from Waveform measurements of  $[\text{Dy}(\text{Dtp})_2][\text{Al}\{\text{OC}(\text{CF}_3)_3\}_4]$  performed at 6 K

| Temperature (K) | Frequency (Hz)           | $\chi'$ ( $\text{cm}^3\text{mol}^{-1}$ ) | $\chi''$ ( $\text{cm}^3\text{mol}^{-1}$ ) | Phase (rad) |
|-----------------|--------------------------|------------------------------------------|-------------------------------------------|-------------|
| 6               | $9.99269 \times 10^{-5}$ | 1.84014                                  | 0.18998                                   | 0.10287     |
| 6               | $7.03517 \times 10^{-4}$ | 1.34866                                  | 0.40504                                   | 0.29176     |
| 6               | $1.6287 \times 10^{-4}$  | 1.77567                                  | 0.27115                                   | 0.15154     |
| 6               | $2.65439 \times 10^{-4}$ | 1.66286                                  | 0.35047                                   | 0.20772     |
| 6               | $4.32639 \times 10^{-4}$ | 1.50859                                  | 0.39582                                   | 0.25659     |
| 6               | 0.00115                  | 1.19385                                  | 0.37745                                   | 0.30622     |
| 6               | 0.00185                  | 1.0575                                   | 0.32518                                   | 0.29832     |
| 6               | 0.003                    | 0.95696                                  | 0.25756                                   | 0.26291     |
| 6               | 0.00764                  | 0.83579                                  | 0.138                                     | 0.16364     |
| 6               | 0.01887                  | 0.79394                                  | 0.06645                                   | 0.08351     |
| 6               | 0.03908                  | 0.77205                                  | 0.05203                                   | 0.06729     |

Table S4: Frequencies, susceptibilities and phase angles extracted from Waveform measurements of  $[\text{Dy}(\text{Dtp})_2][\text{Al}\{\text{OC}(\text{CF}_3)_3\}_4]$  performed at 9 K

| Temperature (K) | Frequency (Hz)           | $\chi'$ ( $\text{cm}^3\text{mol}^{-1}$ ) | $\chi''$ ( $\text{cm}^3\text{mol}^{-1}$ ) | Phase (rad) |
|-----------------|--------------------------|------------------------------------------|-------------------------------------------|-------------|
| 9               | $9.99269 \times 10^{-5}$ | 1.267                                    | 0.11782                                   | 0.09273     |
| 9               | $7.03517 \times 10^{-4}$ | 0.94731                                  | 0.27178                                   | 0.2794      |
| 9               | $1.6287 \times 10^{-4}$  | 1.22882                                  | 0.17154                                   | 0.1387      |
| 9               | $2.65439 \times 10^{-4}$ | 1.15865                                  | 0.22753                                   | 0.19391     |
| 9               | $4.32639 \times 10^{-4}$ | 1.05843                                  | 0.26305                                   | 0.24359     |
| 9               | 0.00114                  | 0.84159                                  | 0.25634                                   | 0.29567     |
| 9               | 0.00185                  | 0.74767                                  | 0.22114                                   | 0.28758     |
| 9               | 0.003                    | 0.67478                                  | 0.17752                                   | 0.25726     |
| 9               | 0.00763                  | 0.59336                                  | 0.09453                                   | 0.15798     |
| 9               | 0.01874                  | 0.5648                                   | 0.04517                                   | 0.07981     |
| 9               | 0.03926                  | 0.55079                                  | 0.03036                                   | 0.05507     |

Table S5: Frequencies, susceptibilities and phase angles extracted from Waveform measurements of  $[\text{Dy}(\text{Dtp})_2][\text{Al}\{\text{OC}(\text{CF}_3)_3\}_4]$  performed at 13 K

| Temperature (K) | Frequency (Hz)           | $\chi'$ ( $\text{cm}^3\text{mol}^{-1}$ ) | $\chi''$ ( $\text{cm}^3\text{mol}^{-1}$ ) | Phase (rad) |
|-----------------|--------------------------|------------------------------------------|-------------------------------------------|-------------|
| 13              | $7.03383 \times 10^{-4}$ | 0.69586                                  | 0.19508                                   | 0.27333     |
| 13              | $1.62871 \times 10^{-4}$ | 0.88194                                  | 0.10491                                   | 0.11839     |
| 13              | $4.32624 \times 10^{-4}$ | 0.77598                                  | 0.18088                                   | 0.22901     |
| 13              | 0.00114                  | 0.61603                                  | 0.1877                                    | 0.29576     |
| 13              | 0.00185                  | 0.54608                                  | 0.16403                                   | 0.2918      |
| 13              | 0.003                    | 0.49174                                  | 0.13176                                   | 0.2618      |
| 13              | 0.00765                  | 0.42968                                  | 0.06958                                   | 0.16054     |
| 13              | 0.01885                  | 0.41027                                  | 0.03169                                   | 0.07708     |
| 13              | 0.03879                  | 0.39864                                  | 0.02601                                   | 0.06517     |

Table S6: Frequencies, susceptibilities and phase angles extracted from Waveform measurements of  $[\text{Dy}(\text{Dtp})_2][\text{Al}\{\text{OC}(\text{CF}_3)_3\}_4]$  performed at 16 K

| Temperature (K) | Frequency (Hz)           | $\chi'$ ( $\text{cm}^3\text{mol}^{-1}$ ) | $\chi''$ ( $\text{cm}^3\text{mol}^{-1}$ ) | Phase (rad) |
|-----------------|--------------------------|------------------------------------------|-------------------------------------------|-------------|
| 16              | $7.03509 \times 10^{-4}$ | 0.59403                                  | 0.16147                                   | 0.2654      |
| 16              | $1.62883 \times 10^{-4}$ | 0.72781                                  | 0.07222                                   | 0.0989      |
| 16              | $4.32563 \times 10^{-4}$ | 0.65932                                  | 0.13944                                   | 0.20842     |
| 16              | 0.00114                  | 0.52444                                  | 0.16117                                   | 0.29816     |
| 16              | 0.00185                  | 0.4607                                   | 0.14306                                   | 0.30109     |
| 16              | 0.003                    | 0.41157                                  | 0.11577                                   | 0.2742      |
| 16              | 0.00764                  | 0.35865                                  | 0.06175                                   | 0.1705      |
| 16              | 0.01881                  | 0.3401                                   | 0.02919                                   | 0.08562     |
| 16              | 0.03884                  | 0.33071                                  | 0.0156                                    | 0.04714     |

Table S7: Frequencies, susceptibilities and phase angles extracted from Waveform measurements of  $[\text{Dy}(\text{Dtp})_2][\text{Al}\{\text{OC}(\text{CF}_3)_3\}_4]$  performed at 20 K. Two data sets were collected at this temperature, some frequencies appear twice.

| Temperature (K) | Frequency (Hz)           | $\chi'$ ( $\text{cm}^3\text{mol}^{-1}$ ) | $\chi''$ ( $\text{cm}^3\text{mol}^{-1}$ ) | Phase (rad) |
|-----------------|--------------------------|------------------------------------------|-------------------------------------------|-------------|
| 20              | $1.62877 \times 10^{-4}$ | 0.59629                                  | 0.04418                                   | 0.07395     |
| 20              | $1.62877 \times 10^{-4}$ | 0.59508                                  | 0.04413                                   | 0.07403     |
| 20              | $4.32618 \times 10^{-4}$ | 0.55824                                  | 0.0971                                    | 0.17221     |
| 20              | $4.32618 \times 10^{-4}$ | 0.55867                                  | 0.09697                                   | 0.17186     |
| 20              | $7.03507 \times 10^{-4}$ | 0.5156                                   | 0.12466                                   | 0.23722     |
| 20              | $7.03507 \times 10^{-4}$ | 0.51531                                  | 0.12422                                   | 0.23654     |
| 20              | 0.00114                  | 0.4575                                   | 0.13725                                   | 0.29145     |
| 20              | 0.00114                  | 0.45611                                  | 0.13684                                   | 0.29148     |
| 20              | 0.00185                  | 0.39864                                  | 0.12945                                   | 0.31398     |
| 20              | 0.00185                  | 0.3976                                   | 0.12894                                   | 0.31359     |
| 20              | 0.003                    | 0.34899                                  | 0.10712                                   | 0.29781     |
| 20              | 0.003                    | 0.34867                                  | 0.10701                                   | 0.29777     |
| 20              | 0.00479                  | 0.31329                                  | 0.08212                                   | 0.25635     |
| 20              | 0.00764                  | 0.29433                                  | 0.05767                                   | 0.19349     |
| 20              | 0.01205                  | 0.28439                                  | 0.03935                                   | 0.13751     |
| 20              | 0.01886                  | 0.27836                                  | 0.02615                                   | 0.09367     |
| 20              | 0.0387                   | 0.27014                                  | 0.0165                                    | 0.06101     |
| 20              | 0.03952                  | 0.27045                                  | 0.01716                                   | 0.06338     |

Table S8: Frequencies, susceptibilities and phase angles extracted from Waveform measurements of  $[\text{Dy}(\text{Dtp})_2][\text{Al}\{\text{OC}(\text{CF}_3)_3\}_4]$  performed at 23 K

| Temperature (K) | Frequency (Hz)           | $\chi'$ ( $\text{cm}^3\text{mol}^{-1}$ ) | $\chi''$ ( $\text{cm}^3\text{mol}^{-1}$ ) | Phase (rad) |
|-----------------|--------------------------|------------------------------------------|-------------------------------------------|-------------|
| 23              | $1.6288 \times 10^{-4}$  | 0.52225                                  | 0.03073                                   | 0.05878     |
| 23              | $4.32596 \times 10^{-4}$ | 0.502                                    | 0.07184                                   | 0.14214     |
| 23              | 0.00114                  | 0.42678                                  | 0.11955                                   | 0.27312     |
| 23              | 0.00185                  | 0.37069                                  | 0.1204                                    | 0.31406     |
| 23              | 0.003                    | 0.32011                                  | 0.10375                                   | 0.31341     |
| 23              | 0.00482                  | 0.285                                    | 0.08021                                   | 0.27435     |
| 23              | 0.01178                  | 0.25124                                  | 0.03967                                   | 0.15662     |
| 23              | 0.02853                  | 0.24143                                  | 0.01695                                   | 0.07011     |
| 23              | 0.05101                  | 0.23345                                  | 0.02294                                   | 0.09795     |



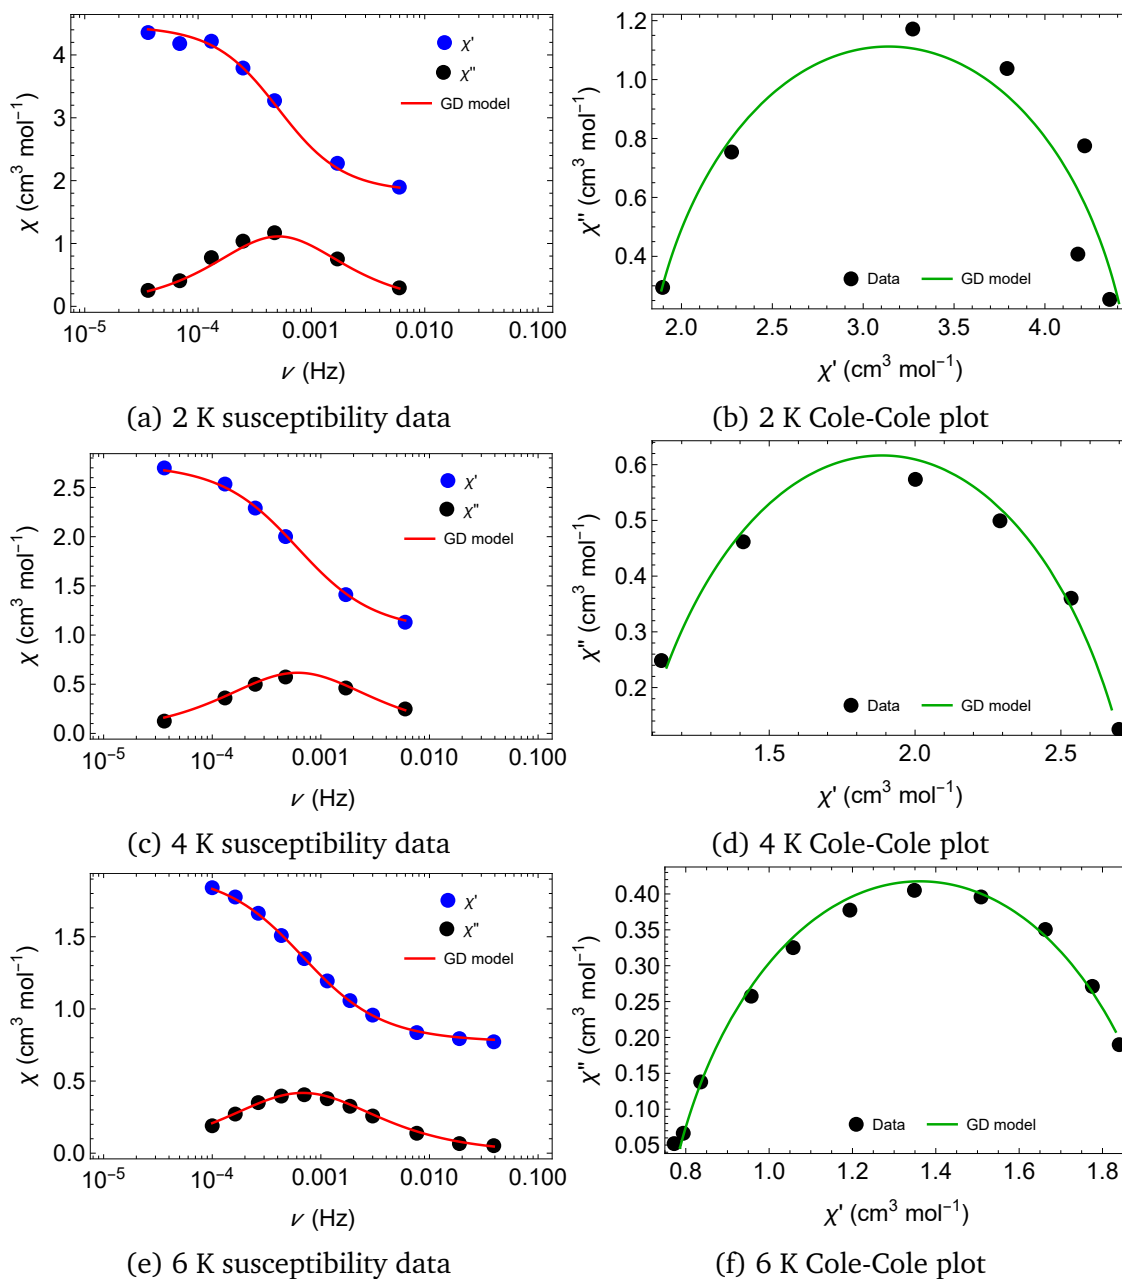

Figure S29: In- and out-of-phase susceptibility data of  $[\text{Dy}(\text{Dtp})_2][\text{Al}\{\text{OC}(\text{CF}_3)_3\}_4]$  extracted from Waveform measurements fitted to the Generalised Debye model (Eq. 1 (left column) with associated Cole-Cole plots (right column). Results of the fit are shown in Table S9.

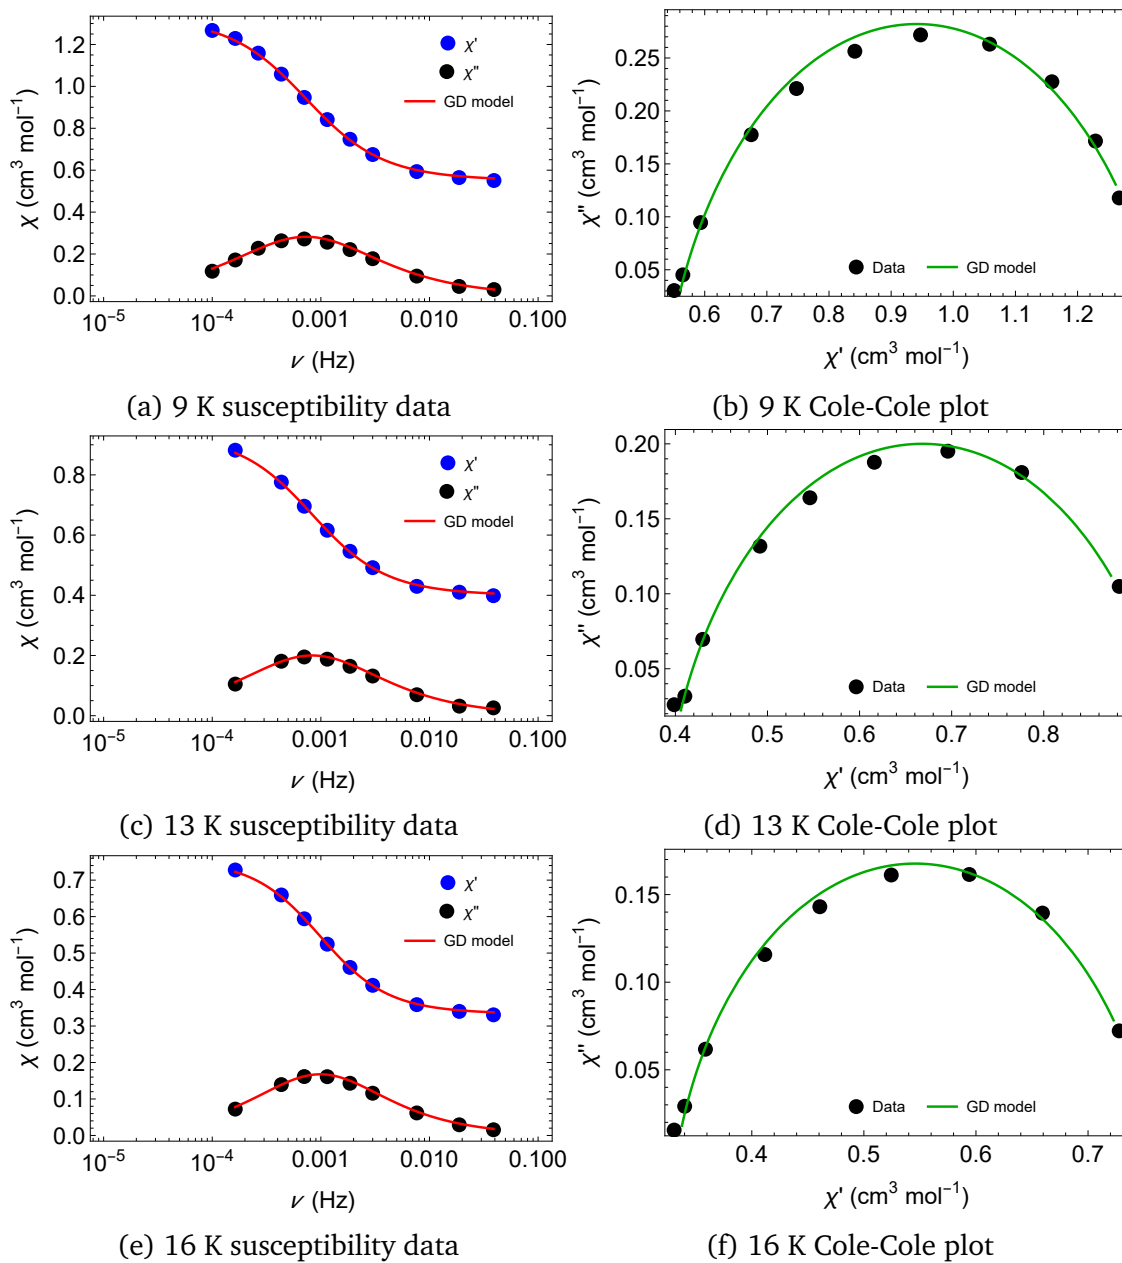

Figure S30: In- and out-of-phase susceptibility data of  $[\text{Dy}(\text{Dtp})_2][\text{Al}\{\text{OC}(\text{CF}_3)_3\}_4]$  extracted from Waveform measurements fitted to the Generalised Debye model (Eq. 1 (left column) with associated Cole-Cole plots (right column). Results of the fit are shown in Table S9.

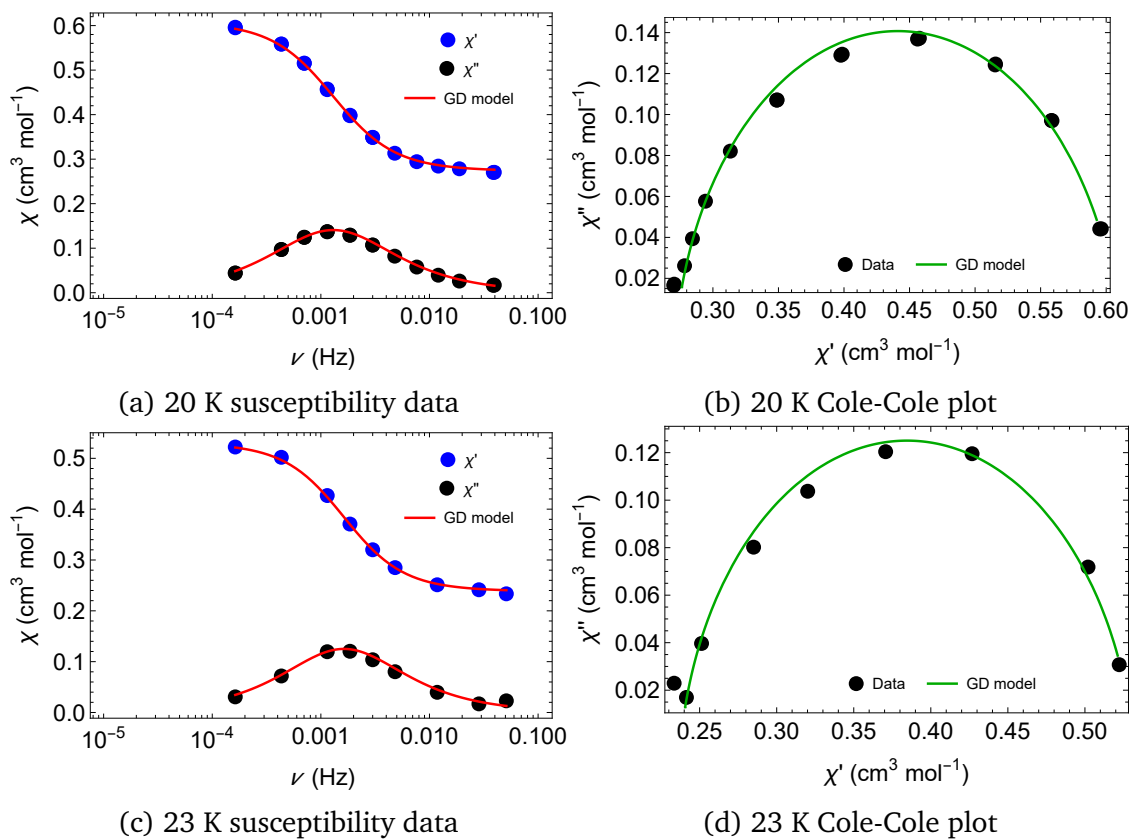

Figure S31: In- and out-of-phase susceptibility data of  $[\text{Dy}(\text{Dtp})_2][\text{Al}\{\text{OC}(\text{CF}_3)_3\}_4]$  extracted from Waveform measurements fitted to the Generalised Debye model (Eq. 1 (left column) with associated Cole-Cole plots (right column). Results of the fit are shown in Table S9.

Table S9: Results of fitting the waveform susceptibility data to a Generalised Debye model (Eq. 1) shown graphically in Fig. S29 - S31. Here,  $\Delta\chi = \chi_T - \chi_S$

| Temperature (K) | $\chi_S$ (cm <sup>3</sup> mol <sup>-1</sup> ) | $\Delta\chi$ (cm <sup>3</sup> mol <sup>-1</sup> ) | $\tau_{\text{debye}}$ (s) | $\alpha$   |
|-----------------|-----------------------------------------------|---------------------------------------------------|---------------------------|------------|
| 2               | 1.80(8)                                       | 2.7(1)                                            | 311(21)                   | 0.116(39)  |
| 4               | 1.03(4)                                       | 1.710(6)                                          | 259(15)                   | 0.198(29)  |
| 6               | 0.767(8)                                      | 1.19(2)                                           | 233.3(5.6)                | 0.220(11)  |
| 9               | 0.549(5)                                      | 0.78(1)                                           | 217.7(5.3)                | 0.206(12)  |
| 13              | 0.398(4)                                      | 0.54(1)                                           | 190.9(5.9)                | 0.188(15)  |
| 16              | 0.332(3)                                      | 0.427(7)                                          | 161.1(4.0)                | 0.152(13)  |
| 20              | 0.273(2)                                      | 0.337(4)                                          | 122.4(1.8)                | 0.1133(88) |
| 23              | 0.238(3)                                      | 0.293(6)                                          | 97.7(3.3)                 | 0.101(19)  |

## S2 DC decay analysis

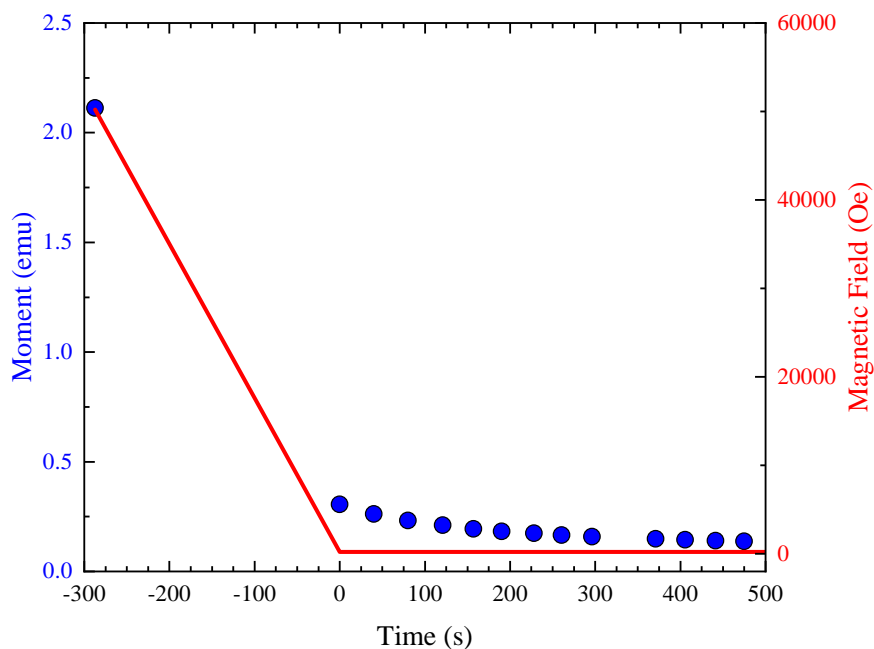

Figure S32: Current method of performing DC decay measurements in the molecular magnetism community. One or two measurements are made at saturation (in this case 5 T) before the field is dropped to target as fast as possible. A wait command for field stability is used before the first measurement point.<sup>1,2</sup> Data is taken from Ding *et al.*<sup>2</sup> and were performed at 2 K and target field of 230 Oe.

## S2.1 Determining $M_0$

Justification for the method for determining where  $M_0$  is reached using the time when  $d^3M/dt^3 = 0$ . The field is swept at a fixed rate from an initial to a final value. For an ideal fast relaxing sample ( $\tau = 0$ ) the moment will mimic the change in field. This causes a step function in  $dM/dt$  at the points that field sweep rate changes (Fig. S33). This corresponds to a peak in  $d^2M/dt^2$  and derivative shape in  $d^3M/dt^3$ . The exact point at which the field is settled occurs at the centre of this derivative shape when  $d^3M/dt^3 = 0$ . As can be observed for all our field sweeps, this occurs within 1.5 s of the first measured point (Fig. S34 and S35).

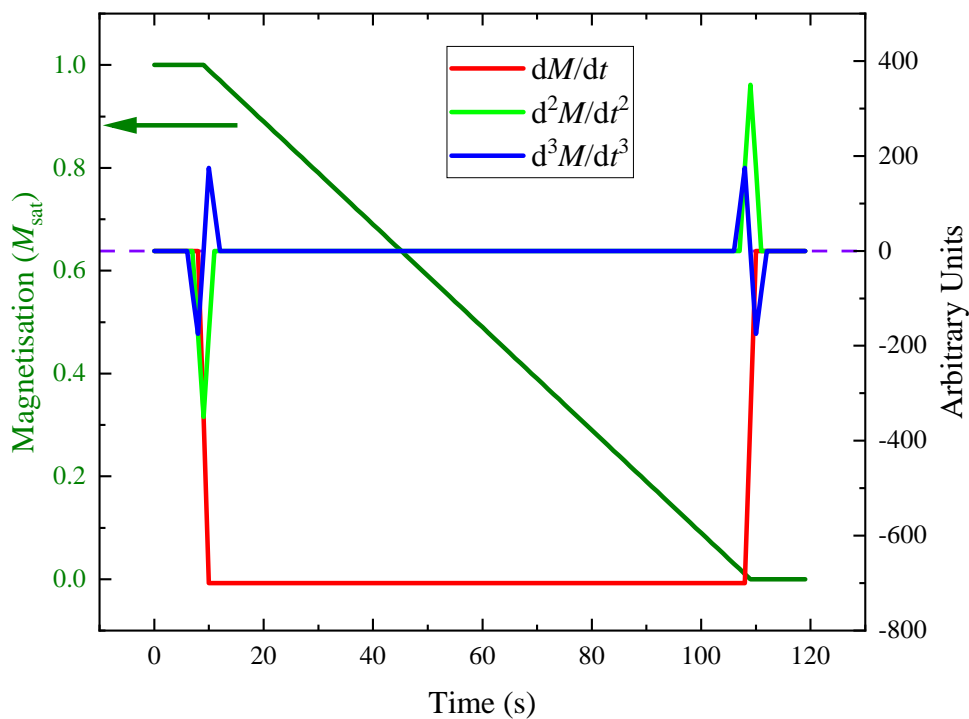

Figure S33: What would occur in an ideal, fast relaxing sample during the field change from saturation to zero.

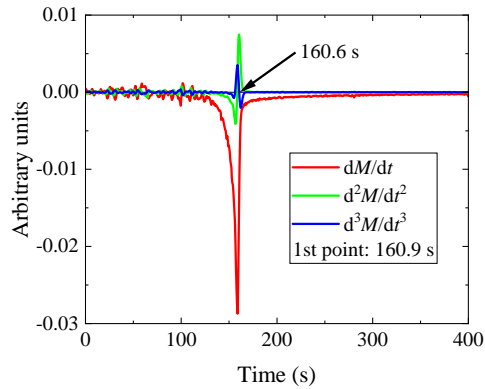

(a) 2 K data

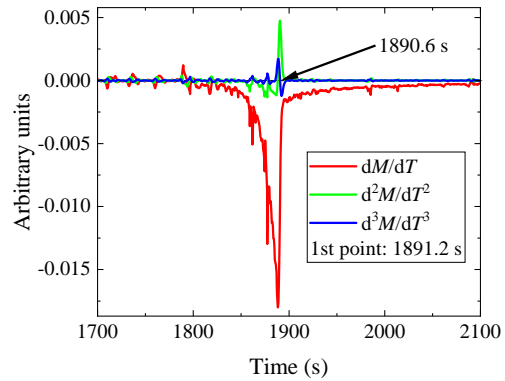

(b) 4 K data

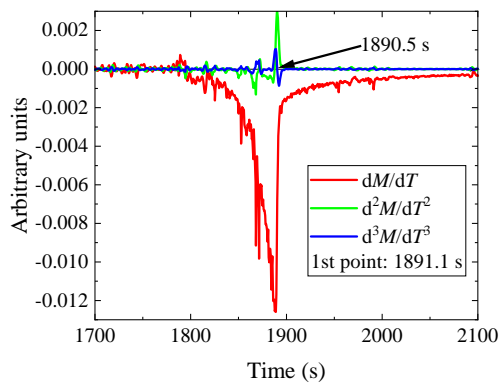

(c) 6 K data

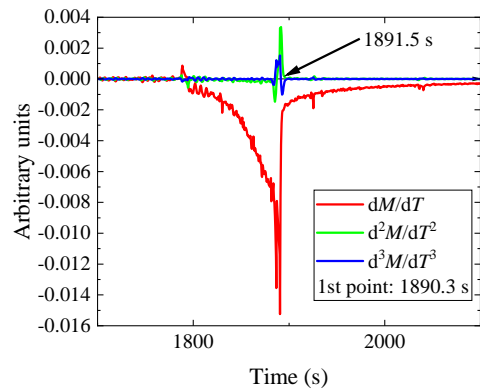

(d) 9 K data

Figure S34: Differentials of the magnetisation in the region of the applied field change in the DC decay measurements. Where the value of  $dM^3/dt^2 = 0$  is where the field is stable at target.

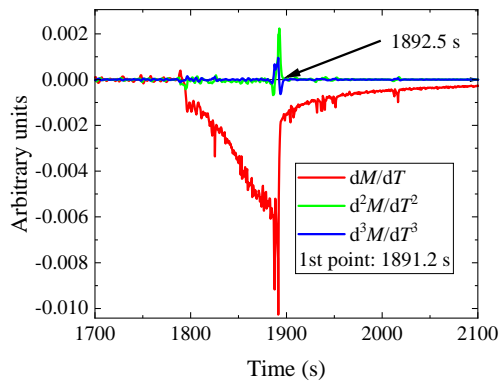

(a) 13 K data

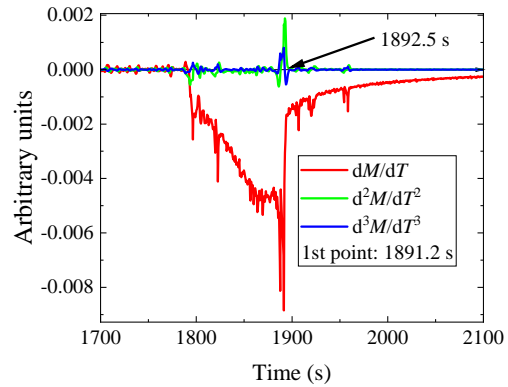

(b) 16 K data

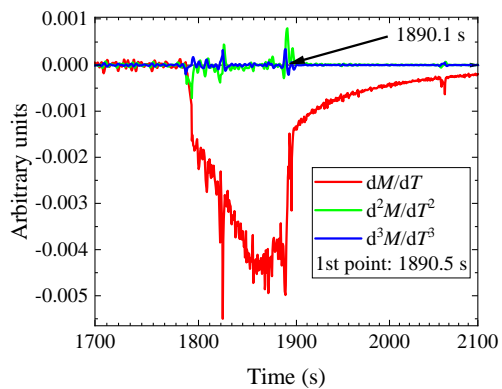

(c) 20 K data

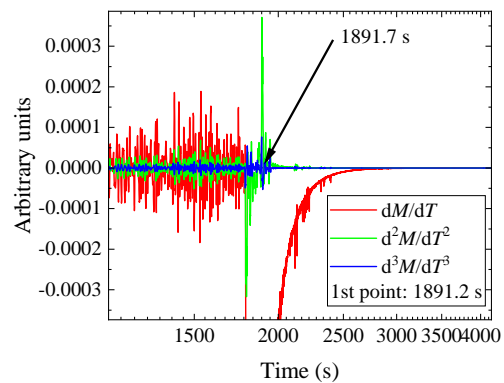

(d) 23 K data

Figure S35: Differentials of the magnetisation in the region of the applied field change in the DC decay measurements. Where the value of  $dM^3/dt^2 = 0$  is where the field is stable at target.

## S2.2 Measurement setup

Comparison of the different methods of setting up a magnetisation measurement using a Quantum Design MPMS3 SQUID magnetometer (Section 4.2).

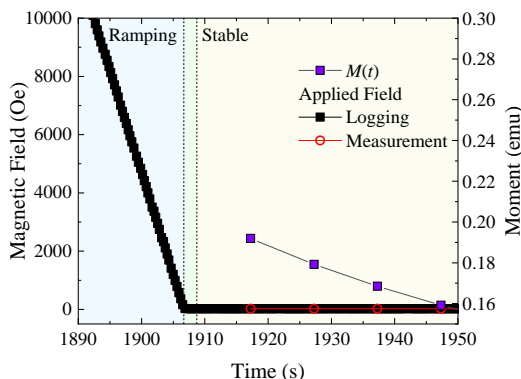

(a) DC mode with 4 s measurement time and a wait command for field stability.

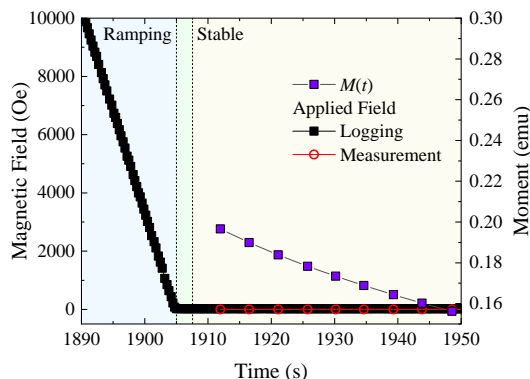

(b) DC mode with 1 s measurement time and a wait command for field stability.

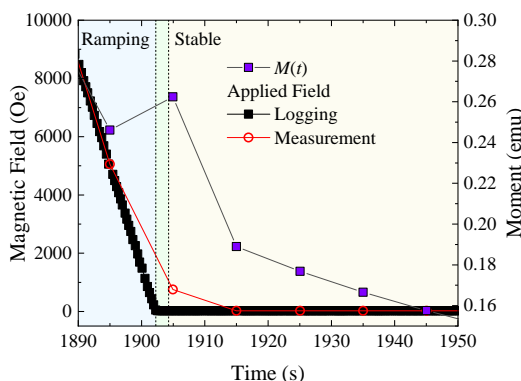

(c) DC mode with 4 s measurement time and measuring through the field change.

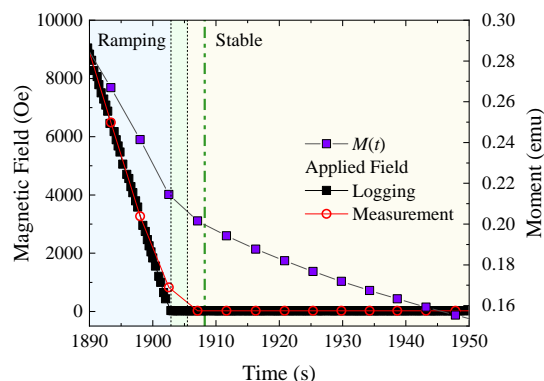

(d) DC mode with 1 s measurement time and measuring through the field change.

Figure S36: Test of the wait command versus measuring through the field change when ramping the magnetic field in a QD MPMS3 from 7  $\rightarrow$  0 T for DC mode with measurement times of 4 and 1 s. The logging of the magnetic field is also shown in black squares. The light blue shaded regions indicates a ramping field status, light green the stabilisation of the magnetic field and the light yellow the stable magnetic field status. The green dash dot line is where the  $d^3M/dt^3$  data crosses zero as described in Section S2.1. The results are shown in Table S10.



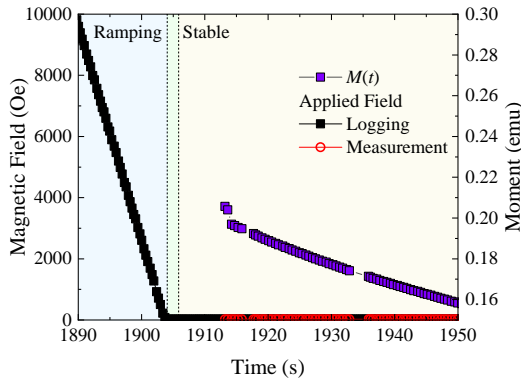

(a) VSM mode with a wait command for field stability and auto-ranging.

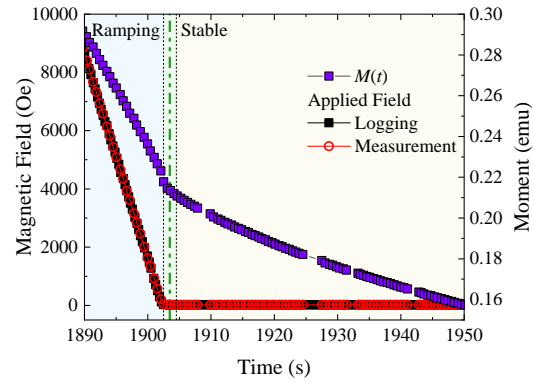

(b) VSM mode measuring through the field change and auto-ranging.

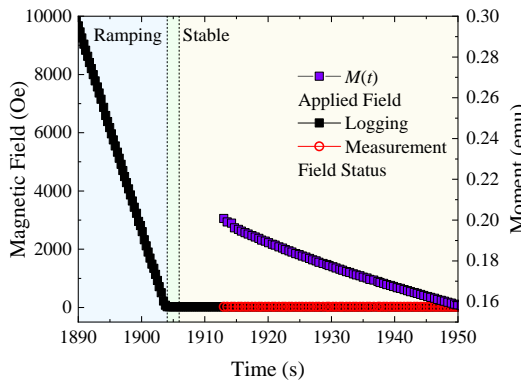

(c) VSM mode with a wait command for field stability and fixed ranges.

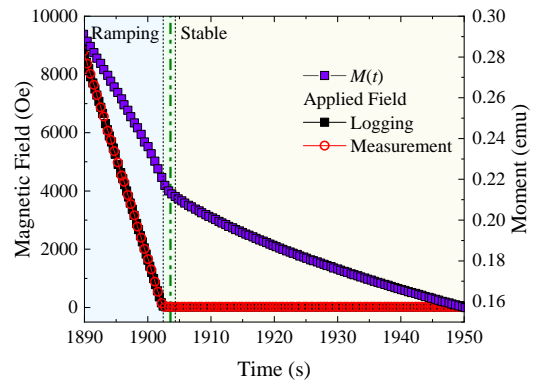

(d) VSM mode measuring through the field change and fixed ranges.

Figure S37: Test of the wait command versus measuring through the field change when ramping the magnetic field in a QD MPMS3 from  $7 \rightarrow 0$  T for VSM mode with auto- and fixed-ranges. The logging of the magnetic field is also shown in black squares. The light blue shaded regions indicates a ramping field status, light green the stabilisation of the magnetic field and the light yellow the stable magnetic field status. The green dash dot line is where the  $d^3M/dt^3$  data crosses zero as described in Section S2.1. The results are shown in Table S10.

Table S10: Comparison of the different methods of a dc decay measurement setup using a QD MPMS3 shown in Fig. S36 and S37.

| Method            | Measurement time (s) | Continuous or wait | Time to ramp start (s) | field sweep time (s) | Time to stabilise field (s) | 1 <sup>st</sup> point after target field (s) | 1 <sup>st</sup> point after stable field (s) | $M_0$ (emu) |
|-------------------|----------------------|--------------------|------------------------|----------------------|-----------------------------|----------------------------------------------|----------------------------------------------|-------------|
| DC Mode,<br>30 mm | 4                    | Wait               | 2.54                   | 100.84               | 1.55                        | 10.06                                        | 8.51                                         | 0.19190     |
|                   |                      | Continuous         | 2.38                   | 100.81               | 1.73                        | 12.45                                        | 10.72                                        | 0.18899     |
|                   | 1                    | Wait               | 2.52                   | 101.05               | 2.25                        | 6.65                                         | 4.40                                         | 0.19658     |
|                   |                      | Continuous         | 2.44                   | 100.97               | 2.30                        | 3.91                                         | 1.61                                         | 0.20157     |
| VSM mode,<br>1 mm | 0.5<br>Autorange     | Wait               | 2.26                   | 101.23               | 1.54                        | 8.85                                         | 7.31                                         | 0.20573     |
|                   |                      | Continuous         | 2.23                   | 100.96               | 1.72                        | 0.31                                         | -1.41                                        | 0.21460     |
|                   | 0.5<br>Fixed range   | Wait               | 2.05                   | 101.06               | 1.60                        | 8.66                                         | 7.06                                         | 0.20079     |
|                   |                      | Continuous         | 1.91                   | 101.23               | 1.58                        | 0.54                                         | -1.04                                        | 0.21422     |

### S2.3 How much data should be fit?

Comparison of how fitting different amount of the DC decay trace affects the fitted parameters to determine how much data should be fitted (Section 4.2)

Table S11:  $\tau^*$  and  $\beta$  parameters obtained from fitting DC decay data to Eq. 11 with  $M_0$  fixed to the first measured point and  $t_{\text{offset}} = 0$ .  $M_{\text{eq}}$ ,  $\tau^*$  and  $\beta$  were freely fitted. Data were fitted for various percentages of the decay (99% refers to fitting up to  $0.01M_0$ ). The values shown in this table are for decays measured between 2 and 9 K.

| Temperature (K) | 2            |         |                       | 4            |         |                         | 6            |         |                          | 9            |         |                         |
|-----------------|--------------|---------|-----------------------|--------------|---------|-------------------------|--------------|---------|--------------------------|--------------|---------|-------------------------|
| % Fitted        | $\tau^*$ (s) | $\beta$ | $M_{\text{eq}}$ (emu) | $\tau^*$ (s) | $\beta$ | $M_{\text{eq}}$ (emu)   | $\tau^*$ (s) | $\beta$ | $M_{\text{eq}}$ (emu)    | $\tau^*$ (s) | $\beta$ | $M_{\text{eq}}$ (emu)   |
| 100             | 796.5        | 0.487   | 0.00252               | 532.4        | 0.577   | $3.0840 \times 10^{-4}$ | 414.6        | 0.621   | $-8.0013 \times 10^{-4}$ | 305.0        | 0.669   | $-6.411 \times 10^{-4}$ |
| 99              | 796.5        | 0.487   | 0.00252               | 532.4        | 0.577   | $3.0840 \times 10^{-4}$ | 414.6        | 0.621   | $-8.0013 \times 10^{-4}$ | 305.0        | 0.669   | $-6.411 \times 10^{-4}$ |
| 95              | 733.3        | 0.520   | 0.00913               | 508.4        | 0.5934  | 0.00416                 | 404.1        | 0.630   | 0.00138                  | 301.4        | 0.673   | $3.615 \times 10^{-4}$  |
| 90              | 646.1        | 0.556   | 0.01893               | 470.8        | 0.614   | 0.01067                 | 378.7        | 0.647   | 0.00701                  | 287.2        | 0.687   | 0.00453                 |
| 80              | 503.6        | 0.616   | 0.03886               | 386.4        | 0.657   | 0.02809                 | 316.7        | 0.686   | 0.02318                  | 251.5        | 0.717   | 0.01655                 |
| 70              | 410.9        | 0.657   | 0.05597               | 308.2        | 0.701   | 0.04869                 | 258.7        | 0.726   | 0.04204                  | 218.0        | 0.743   | 0.03                    |
| 60              | 337.3        | 0.690   | 0.07327               | 245.7        | 0.741   | 0.06962                 | 211.5        | 0.762   | 0.06106                  | 190.4        | 0.766   | 0.04309                 |
| 50              | 303.3        | 0.705   | 0.0828                | 197.9        | 0.776   | 0.08966                 | 172.8        | 0.794   | 0.08017                  | 167.2        | 0.783   | 0.05585                 |
| 40              | 339.3        | 0.696   | 0.0713                | 161.1        | 0.805   | 0.1086                  | 140.8        | 0.823   | 0.0993                   | 149.9        | 0.796   | 0.06677                 |
| 30              | 404.4        | 0.685   | 0.05093               | 130.5        | 0.830   | 0.1279                  | 123.5        | 0.839   | 0.1114                   | 153.0        | 0.795   | 0.06437                 |
| 20              | 496.0        | 0.678   | 0.02183               | 101.0        | 0.853   | 0.1506                  | 91.73        | 0.865   | 0.1383                   | 264.5        | 0.772   | -0.0135                 |
| 10              | 85.96        | 0.727   | 0.1975                | 2729         | 0.801   | -1.295                  | 62.37        | 0.888   | 0.1699                   | 353000       | 0.741   | -47.21                  |

Table S12:  $\tau^*$  and  $\beta$  parameters obtained from fitting DC decay data to Eq. 11 with  $M_0$  fixed to the first measured point and  $t_{\text{offset}} = 0$ .  $M_{\text{eq}}$ ,  $\tau^*$  and  $\beta$  were freely fitted. Data were fitted for various percentages of the decay (99% refers to fitting up to  $0.01M_0$ ). The values shown in this table are for decays measured between 13 and 23 K.

| Temperature (K) | 13           |         |                        | 16           |         |                       | 20           |         |                       | 23           |         |                       |
|-----------------|--------------|---------|------------------------|--------------|---------|-----------------------|--------------|---------|-----------------------|--------------|---------|-----------------------|
| % Fitted        | $\tau^*$ (s) | $\beta$ | $M_{\text{eq}}$ (emu)  | $\tau^*$ (s) | $\beta$ | $M_{\text{eq}}$ (emu) | $\tau^*$ (s) | $\beta$ | $M_{\text{eq}}$ (emu) | $\tau^*$ (s) | $\beta$ | $M_{\text{eq}}$ (emu) |
| 100             | 220.6        | 0.743   | $5.399 \times 10^{-4}$ | 174.8        | 0.792   | 0.00101               | 129.6        | 0.847   | 0.00112               | 104.4        | 0.880   | 0.00102               |
| 99              | 220.6        | 0.743   | $5.399 \times 10^{-4}$ | 174.8        | 0.792   | 0.00101               | 129.6        | 0.847   | 0.00112               | 104.4        | 0.880   | 0.00102               |
| 95              | 217.2        | 0.751   | 0.00174                | 171.6        | 0.802   | 0.00232               | 127.3        | 0.858   | 0.00218               | 102.8        | 0.890   | 0.00186               |
| 90              | 209.9        | 0.762   | 0.00448                | 167.2        | 0.812   | 0.00424               | 125.2        | 0.865   | 0.00329               | 101.4        | 0.896   | 0.00261               |
| 80              | 192.9        | 0.784   | 0.01169                | 158.1        | 0.829   | 0.0087                | 121.2        | 0.875   | 0.00557               | 98.82        | 0.905   | 0.00423               |
| 70              | 175.8        | 0.804   | 0.01999                | 148.4        | 0.843   | 0.01404               | 116.6        | 0.884   | 0.00846               | 95.68        | 0.913   | 0.00639               |
| 60              | 159.6        | 0.820   | 0.02891                | 137.8        | 0.856   | 0.02056               | 111.4        | 0.892   | 0.01201               | 91.82        | 0.921   | 0.00928               |
| 50              | 144.7        | 0.834   | 0.03828                | 127.0        | 0.867   | 0.02792               | 106.1        | 0.899   | 0.01605               | 87.54        | 0.928   | 0.01278               |
| 40              | 130.7        | 0.845   | 0.04813                | 117.6        | 0.876   | 0.03503               | 99.09        | 0.907   | 0.02183               | 82.12        | 0.935   | 0.01762               |
| 30              | 111.2        | 0.860   | 0.06375                | 109.5        | 0.882   | 0.04182               | 90.23        | 0.915   | 0.02993               | 70.21        | 0.950   | 0.02932               |
| 20              | 136.3        | 0.848   | 0.04185                | 111.8        | 0.882   | 0.0393                | 74.32        | 0.928   | 0.04593               | 47.74        | 0.981   | 0.05462               |
| 10              | 2739         | 0.814   | -1.5011                | 2702         | 0.849   | -1.7338               | 2706         | 0.895   | -2.1910               | 2726         | 0.935   | -2.7175               |

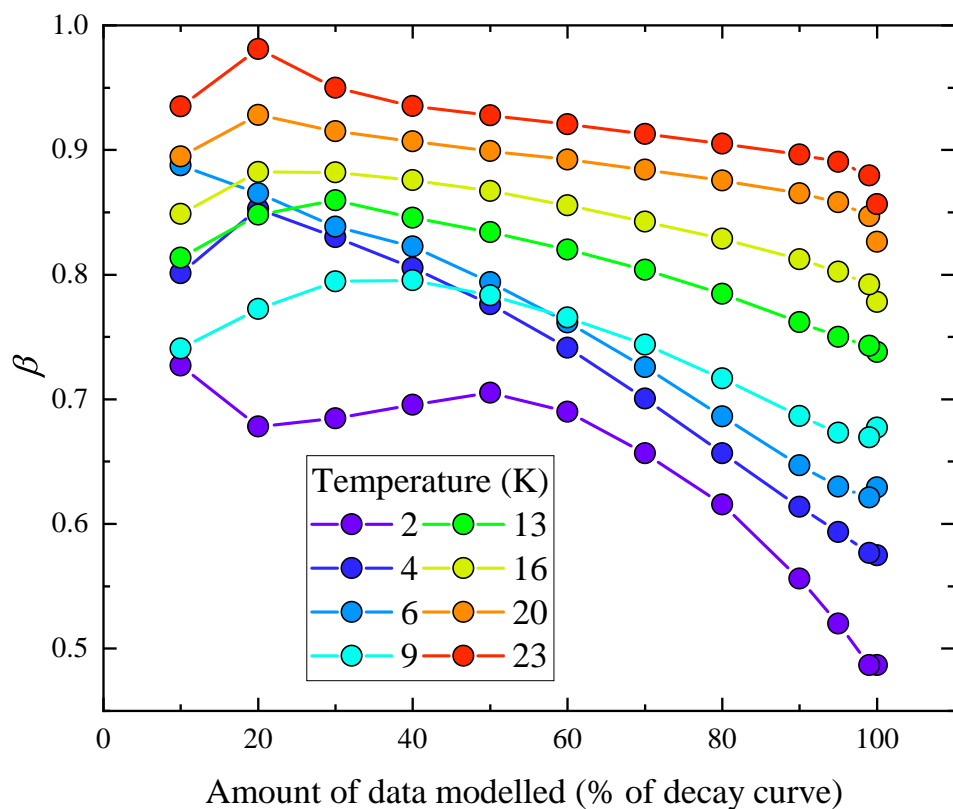

Figure S38: Dependence of how much data is fitted (% of the decay curve) on the  $\beta$  parameter extracted from modelling DC decay data of  $[\text{Dy}(\text{Dtp})_2][\text{Al}\{\text{OC}(\text{CF}_3)_3\}_4]$  to Eq. 11 with  $M_0$  fixed to the first data point and  $t_{\text{offset}} = 0$ . All other parameters are freely fitted.

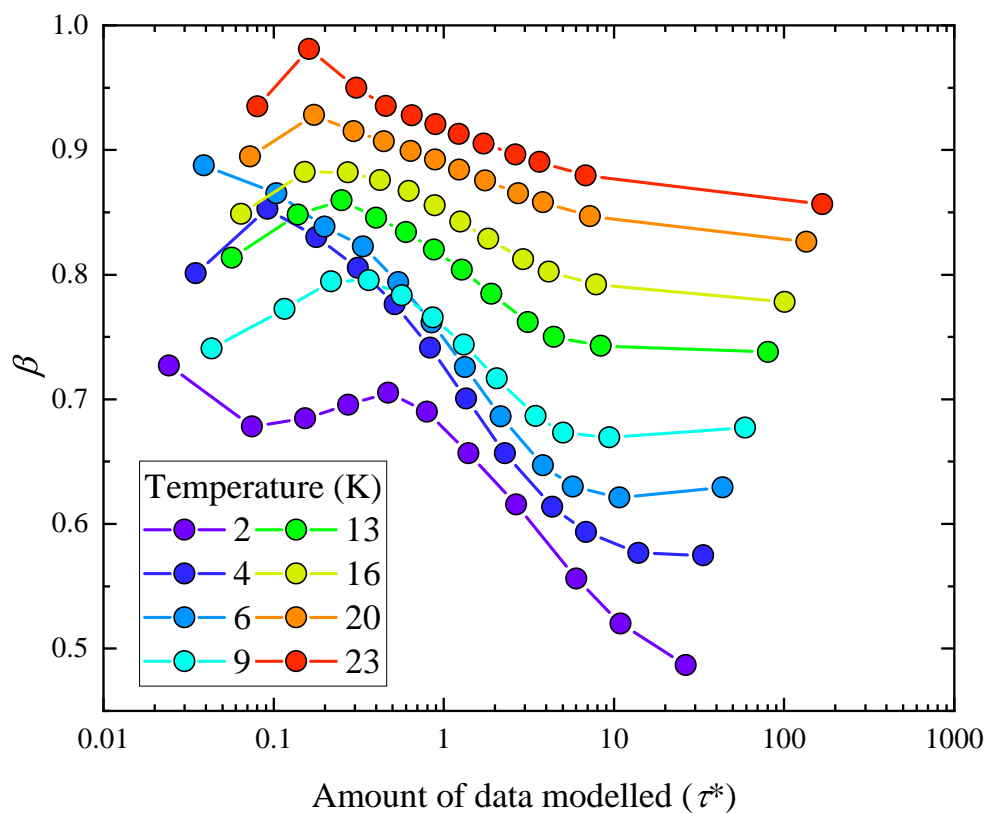

Figure S39: Dependence of how much data is fitted (% of the decay curve) on the  $\beta$  parameter extracted from modelling DC decay data of  $[\text{Dy}(\text{Dtp})_2][\text{Al}\{\text{OC}(\text{CF}_3)_3\}_4]$  to Eq. 11 with  $M_0$  fixed to the first data point and  $t_{\text{offset}} = 0$ . All other parameters are freely fitted.

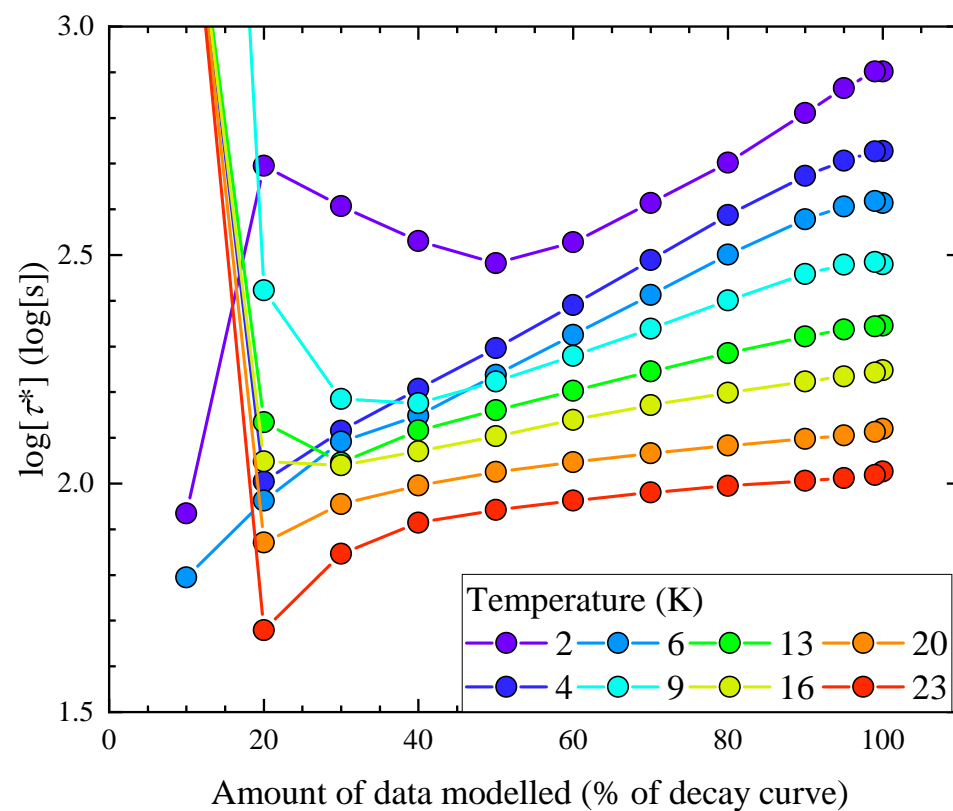

Figure S40: Dependence of how much data is fitted (% of the decay curve) on the  $\tau^*$  parameter extracted from modelling DC decay data of  $[\text{Dy}(\text{Dtp})_2][\text{Al}\{\text{OC}(\text{CF}_3)_3\}_4]$  to Eq. 11 with  $M_0$  fixed to the first data point and  $t_{\text{offset}} = 0$ . All other parameters are freely fitted.

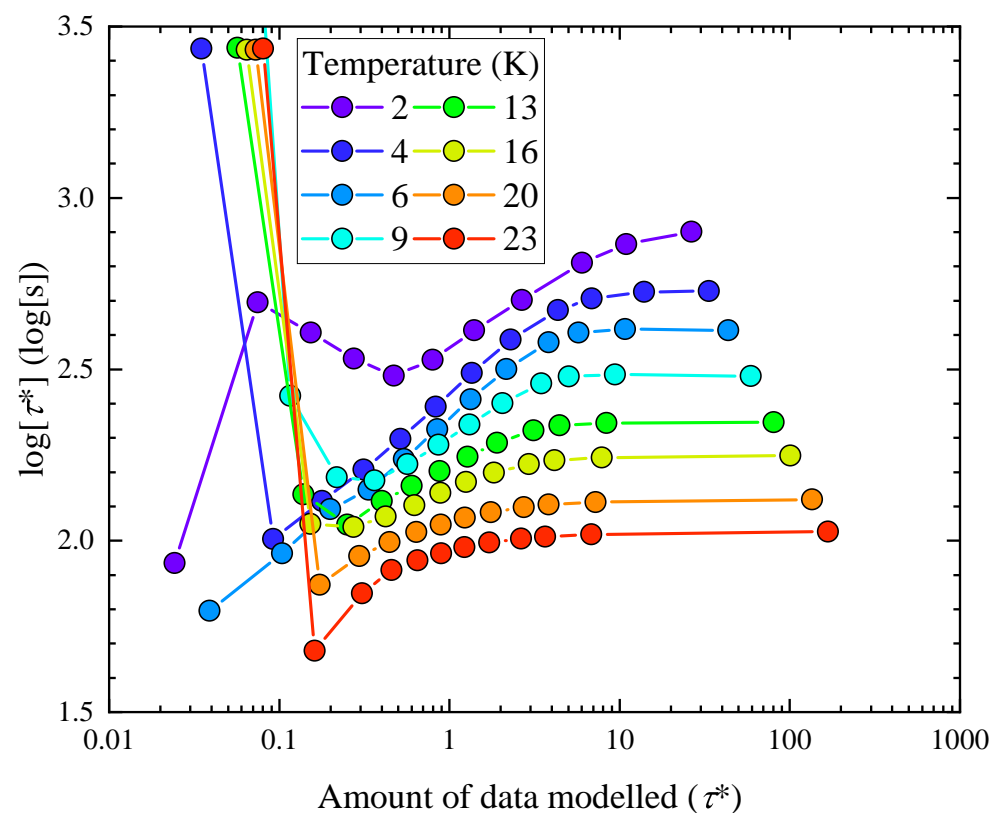

Figure S41: Dependence of how much data is fitted (% of the decay curve) on the  $\tau^*$  parameter extracted from modelling DC decay data of  $[\text{Dy}(\text{Dtp})_2][\text{Al}\{\text{OC}(\text{CF}_3)_3\}_4]$  to Eq. 11 with  $M_0$  fixed to the first data point and  $t_{\text{offset}} = 0$ . All other parameters are freely fitted.



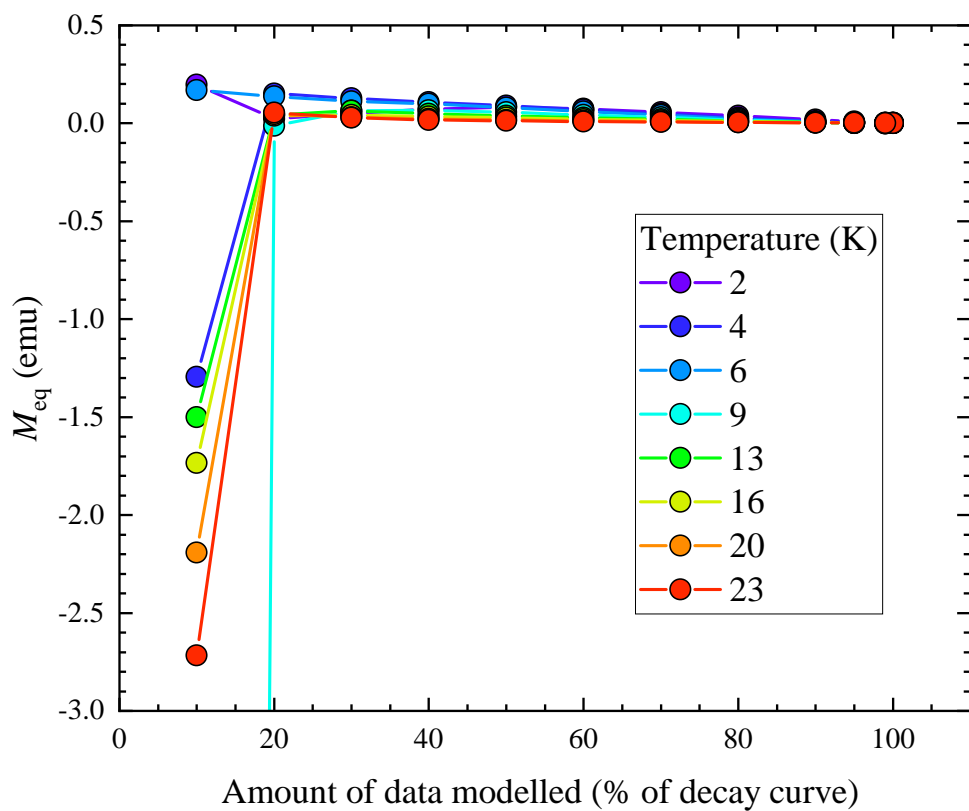

Figure S42: Dependence of how much data is fitted (% of the decay curve) on the  $M_{eq}$  parameter extracted from modelling DC decay data of  $[\text{Dy}(\text{Dtp})_2][\text{Al}\{\text{OC}(\text{CF}_3)_3\}_4]$  to Eq. 11 with  $M_0$  fixed to the first data point and  $t_{\text{offset}} = 0$ . All other parameters are freely fitted.

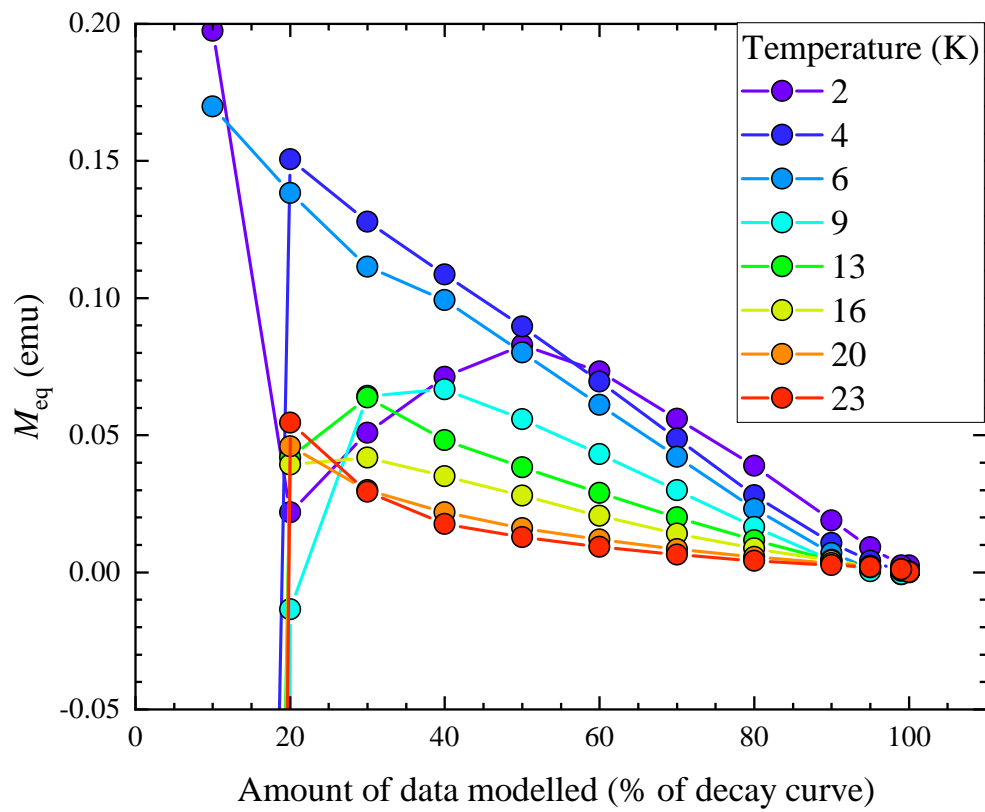

Figure S43: Zoomed in plot of Fig. S44

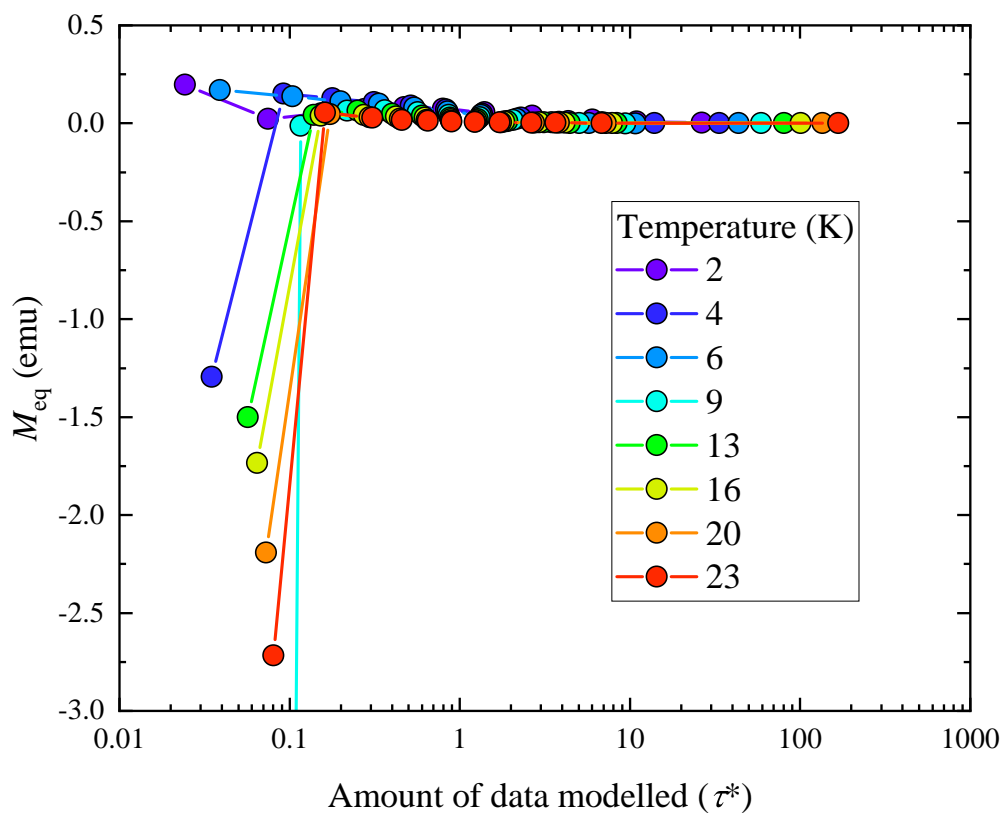

Figure S44: Dependence of how much data is fitted (% of the decay curve) on the  $M_{\text{eq}}$  parameter extracted from modelling DC decay data of  $[\text{Dy}(\text{Dtp})_2][\text{Al}\{\text{OC}(\text{CF}_3)_3\}_4]$  to Eq. 11 with  $M_0$  fixed to the first data point and  $t_{\text{offset}} = 0$ . All other parameters are freely fitted.

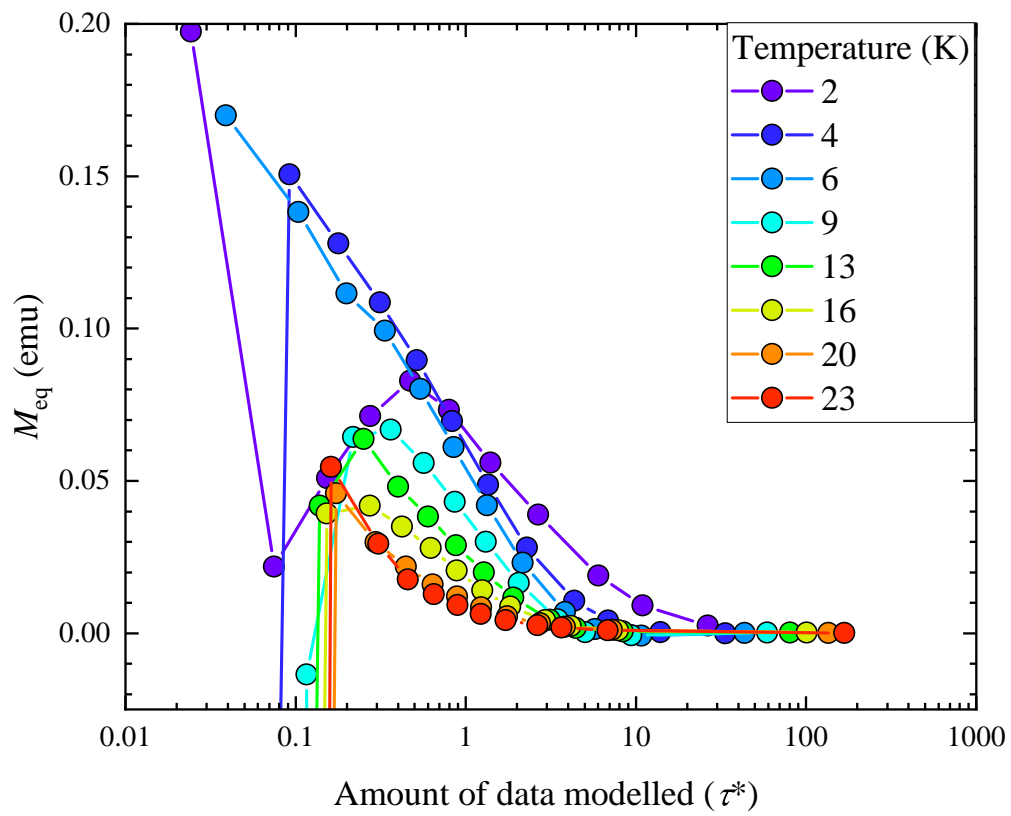

Figure S45: Zoomed in plot of Fig. S44

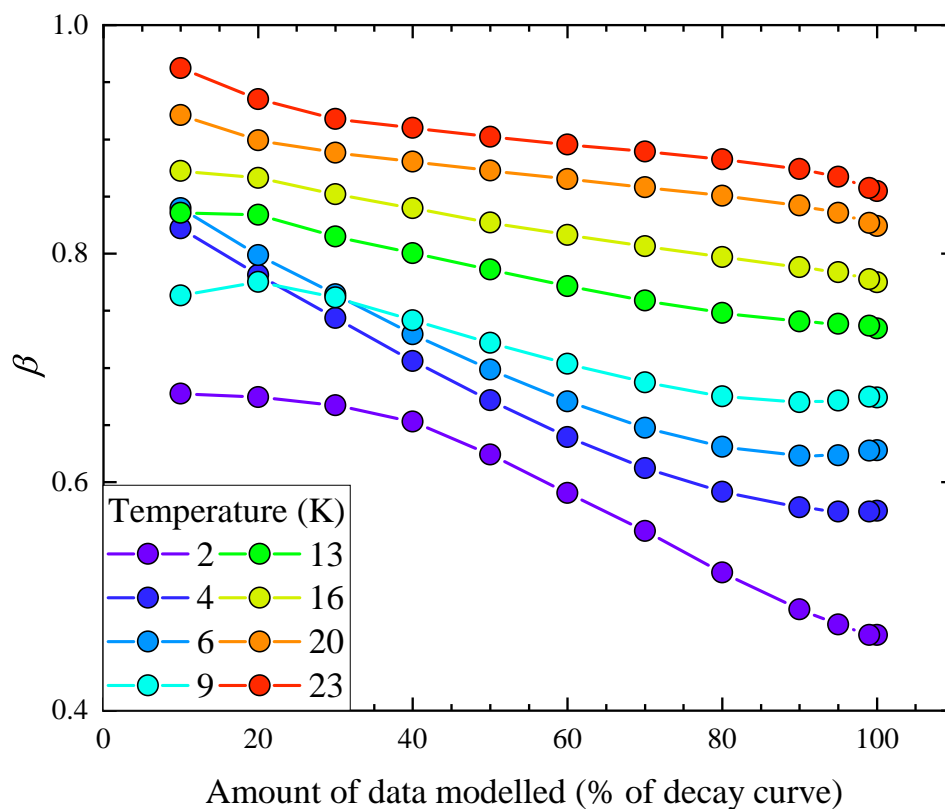

Figure S46: Dependence of how much data is fitted (% of the decay curve) on the  $\beta$  parameter extracted from modelling DC decay data of  $[\text{Dy}(\text{Dtp})_2][\text{Al}\{\text{OC}(\text{CF}_3)_3\}_4]$  to Eq. 11 with  $M_0$  fixed to the first data point,  $M_{\text{eq}}$  fixed to target (in this case  $M_{\text{eq}} = 0$ ) and  $t_{\text{offset}} = 0$ .  $\tau^*$  and  $\beta$  are freely fitted.

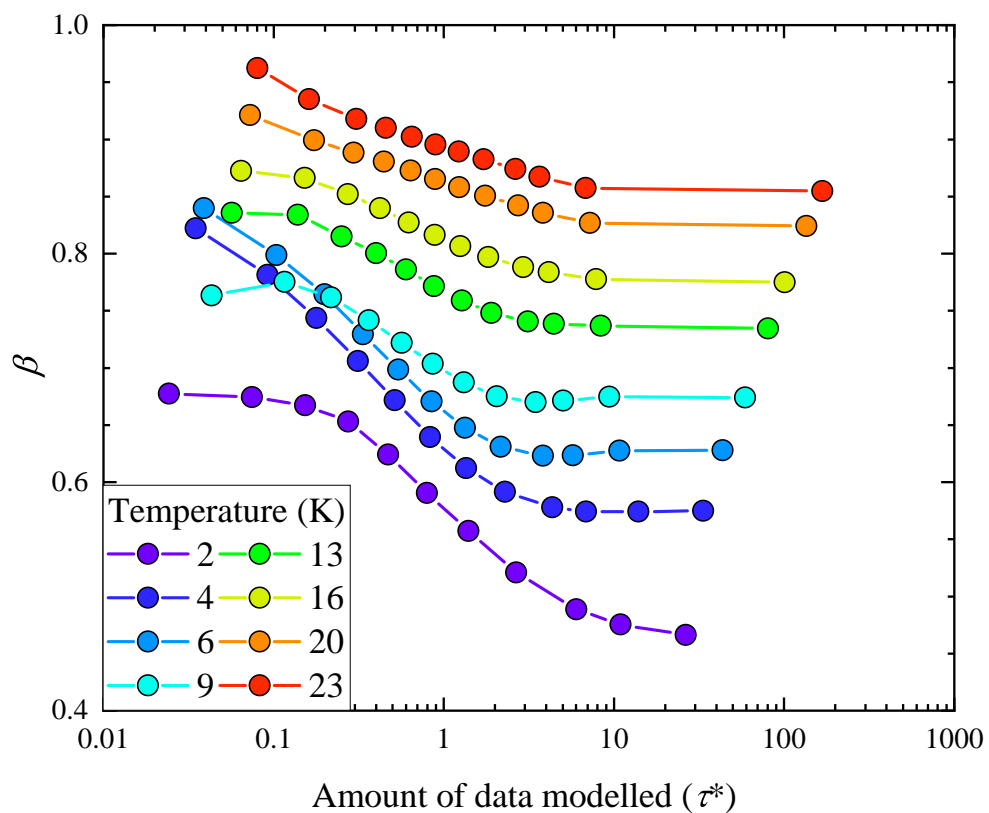

Figure S47: Dependence of how much data is fitted (% of the decay curve) on the  $\beta$  parameter extracted from modelling DC decay data of  $[\text{Dy}(\text{Dtp})_2][\text{Al}\{\text{OC}(\text{CF}_3)_3\}_4]$  to Eq. 11 with  $M_0$  fixed to the first data point,  $M_{\text{eq}}$  fixed to target (in this case  $M_{\text{eq}} = 0$ ) and  $t_{\text{offset}} = 0$ .  $\tau^*$  and  $\beta$  are freely fitted.

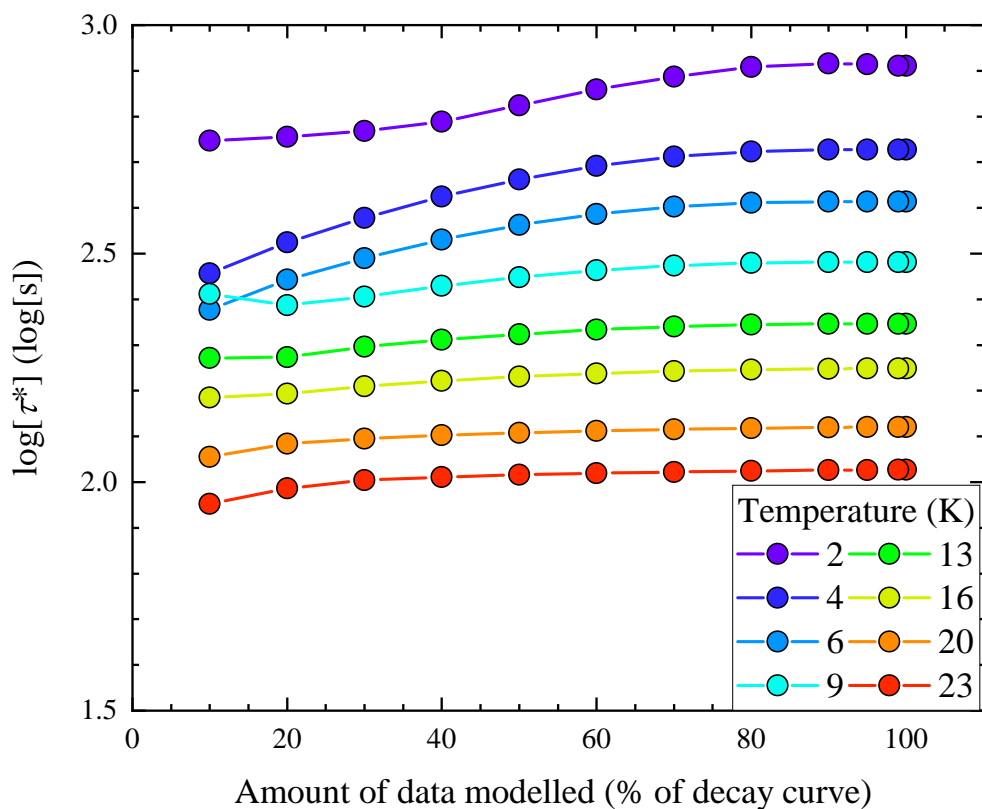

Figure S48: Dependence of how much data is fitted (% of the decay curve) on the  $\tau^*$  parameter extracted from modelling DC decay data of  $[\text{Dy}(\text{Dtp})_2][\text{Al}\{\text{OC}(\text{CF}_3)_3\}_4]$  to Eq. 11 with  $M_0$  fixed to the first data point,  $M_{\text{eq}}$  fixed to target (in this case  $M_{\text{eq}} = 0$ ) and  $t_{\text{offset}} = 0$ .  $\tau^*$  and  $\beta$  are freely fitted.

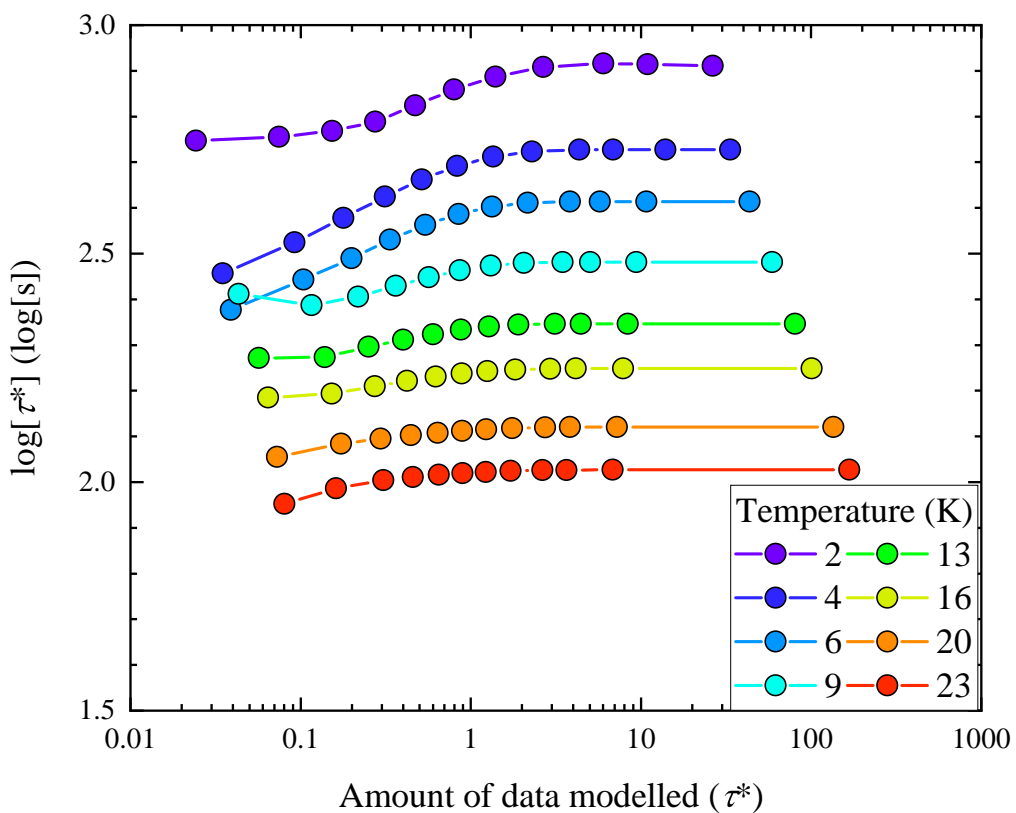

Figure S49: Dependence of how much data is fitted (% of the decay curve) on the  $\tau^*$  parameter extracted from modelling DC decay data of  $[\text{Dy}(\text{Dtp})_2][\text{Al}\{\text{OC}(\text{CF}_3)_3\}_4]$  to Eq. 11 with  $M_0$  fixed to the first data point,  $M_{\text{eq}}$  fixed to target (in this case  $M_{\text{eq}} = 0$ ) and  $t_{\text{offset}} = 0$ .  $\tau^*$  and  $\beta$  are freely fitted.



Table S13:  $\tau^*$  and  $\beta$  parameters obtained from fitting DC decay data to Eq. 11 with  $M_0$  fixed to the first measured point,  $t_{\text{offset}} = 0$  and  $M_{\text{eq}}$  set to target (in this case  $M_{\text{eq}} = 0$ ).  $\tau^*$  and  $\beta$  were freely fitted. Data were fitted for various percentages of the decay (99% refers to fitting up to  $0.01M_0$ ). The values shown in this table are for decays measured between 2 and 9 K.

| Temperature (K) | 2            |         | 4            |         | 6            |         | 9            |         |
|-----------------|--------------|---------|--------------|---------|--------------|---------|--------------|---------|
| % Fitted        | $\tau^*$ (s) | $\beta$ |
| 100             | 814.3        | 0.466   | 534.4        | 0.575   | 411.0        | 0.628   | 302.7        | 0.674   |
| 99              | 814.3        | 0.466   | 534.2        | 0.574   | 411.0        | 0.627   | 302.8        | 0.675   |
| 95              | 821.4        | 0.475   | 534.1        | 0.574   | 410.6        | 0.624   | 302.7        | 0.671   |
| 90              | 824.5        | 0.489   | 533.9        | 0.578   | 410.6        | 0.623   | 302.8        | 0.670   |
| 80              | 809.9        | 0.521   | 529.2        | 0.592   | 408.5        | 0.631   | 301.8        | 0.675   |
| 70              | 771.5        | 0.557   | 515.9        | 0.612   | 400.7        | 0.647   | 297.8        | 0.687   |
| 60              | 723.4        | 0.591   | 492.2        | 0.640   | 386.1        | 0.671   | 290.7        | 0.704   |
| 50              | 667.2        | 0.624   | 459.6        | 0.671   | 365.4        | 0.698   | 280.9        | 0.722   |
| 40              | 615.0        | 0.653   | 421.6        | 0.706   | 339.6        | 0.729   | 268.8        | 0.741   |
| 30              | 586.2        | 0.667   | 378.3        | 0.744   | 308.8        | 0.764   | 254.7        | 0.762   |
| 20              | 569.4        | 0.674   | 334.5        | 0.781   | 277.4        | 0.799   | 243.9        | 0.775   |
| 10              | 558.6        | 0.677   | 286.5        | 0.822   | 238.2        | 0.840   | 258.0        | 0.763   |

Table S14:  $\tau^*$  and  $\beta$  parameters obtained from fitting DC decay data to Eq. 11 with  $M_0$  fixed to the first measured point,  $t_{\text{offset}} = 0$  and  $M_{\text{eq}}$  set to target (in this case  $M_{\text{eq}} = 0$ ).  $\tau^*$  and  $\beta$  were freely fitted. Data were fitted for various percentages of the decay (99% refers to fitting up to  $0.01M_0$ ). The values shown in this table are for decays measured between 13 and 23 K.

| Temperature (K) | 13           |         | 16           |         | 20           |         | 23           |         |
|-----------------|--------------|---------|--------------|---------|--------------|---------|--------------|---------|
| % Fitted        | $\tau^*$ (s) | $\beta$ |
| 100             | 222.0        | 0.734   | 177.3        | 0.775   | 132.0        | 0.824   | 106.4        | 0.855   |
| 99              | 222.1        | 0.737   | 177.3        | 0.778   | 132.1        | 0.827   | 106.4        | 0.857   |
| 95              | 222.1        | 0.748   | 177.3        | 0.784   | 132.0        | 0.836   | 106.3        | 0.867   |
| 90              | 222.0        | 0.741   | 177.1        | 0.788   | 131.8        | 0.842   | 106.2        | 0.874   |
| 80              | 221.1        | 0.748   | 176.3        | 0.797   | 131.2        | 0.851   | 105.8        | 0.883   |
| 70              | 219.0        | 0.759   | 174.9        | 0.807   | 130.4        | 0.858   | 105.3        | 0.889   |
| 60              | 215.5        | 0.771   | 173.0        | 0.816   | 129.5        | 0.865   | 104.6        | 0.896   |
| 50              | 210.6        | 0.786   | 170.3        | 0.827   | 128.2        | 0.873   | 103.7        | 0.902   |
| 40              | 204.8        | 0.800   | 166.5        | 0.840   | 126.6        | 0.880   | 102.5        | 0.910   |
| 30              | 197.7        | 0.815   | 162.2        | 0.852   | 124.5        | 0.888   | 101.0        | 0.918   |
| 20              | 187.6        | 0.834   | 156.1        | 0.866   | 121.3        | 0.899   | 96.9         | 0.935   |
| 10              | 186.9        | 0.836   | 153.0        | 0.872   | 113.5        | 0.921   | 89.7         | 0.962   |

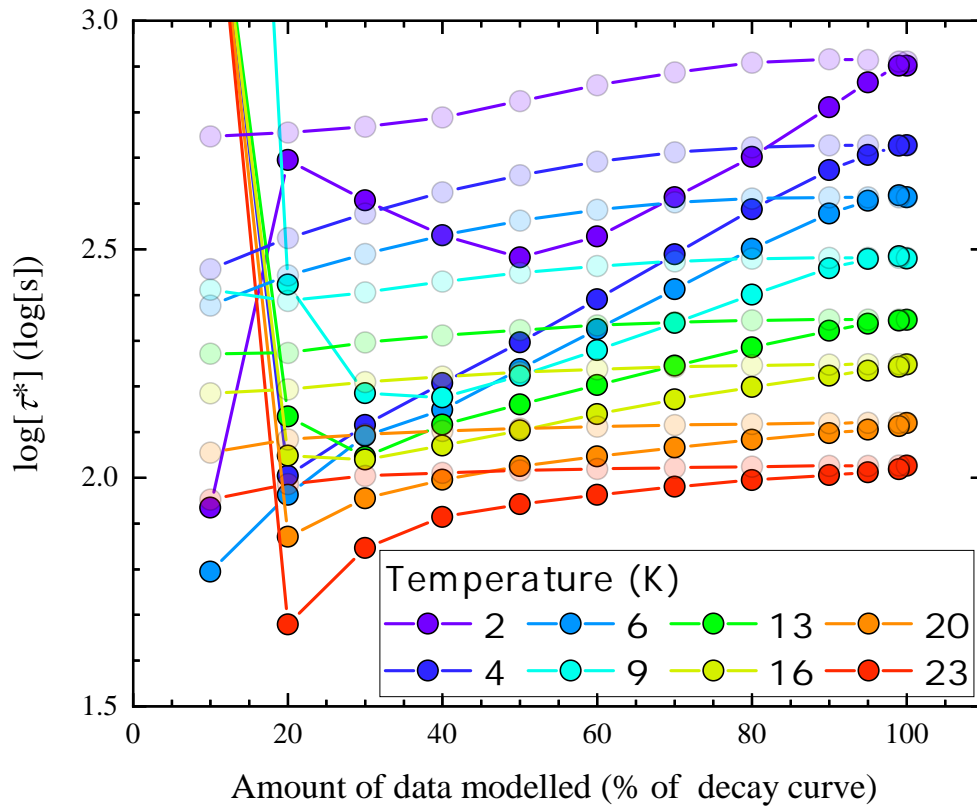

Figure S50: Comparison of Fig. S49 with  $M_{\text{eq}} = 0$  (transparent) and Fig. S41 with  $M_{\text{eq}}$  free (opaque).

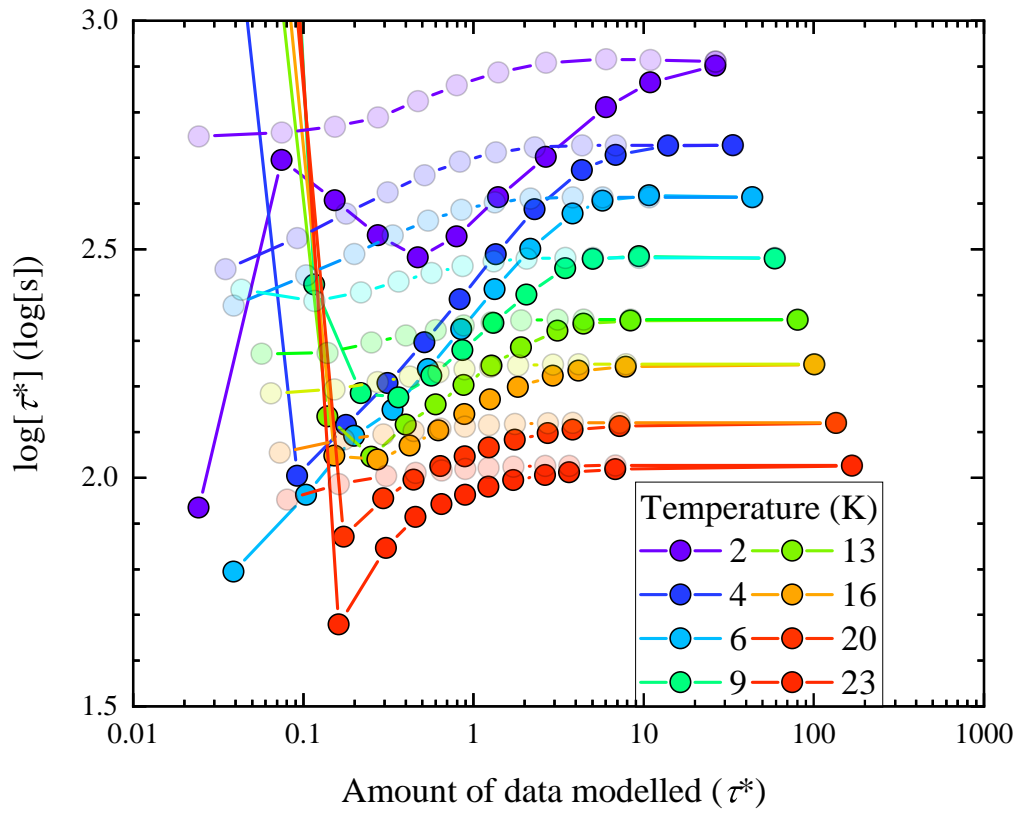

Figure S51: Comparison of Fig. S49 with  $M_{\text{eq}} = 0$  (transparent) and Fig. S41 with  $M_{\text{eq}}$  free (opaque).

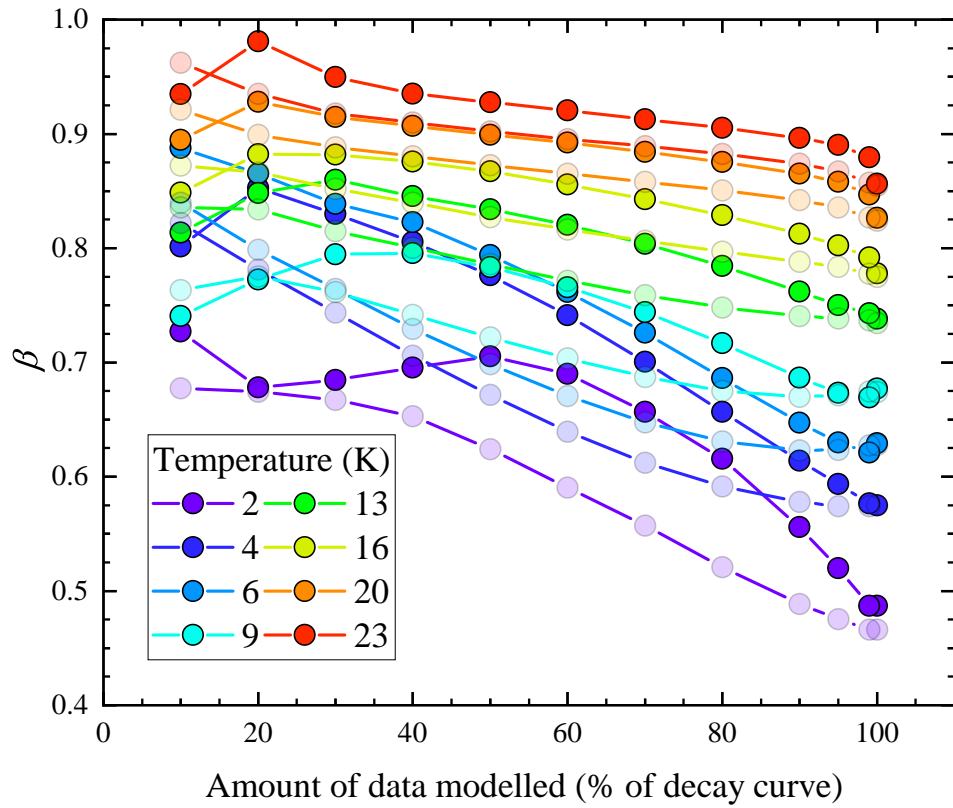

Figure S52: Comparison of Fig. S47 with  $M_{eq} = 0$  (transparent) and Fig. S39 with  $M_{eq}$  free (opaque).

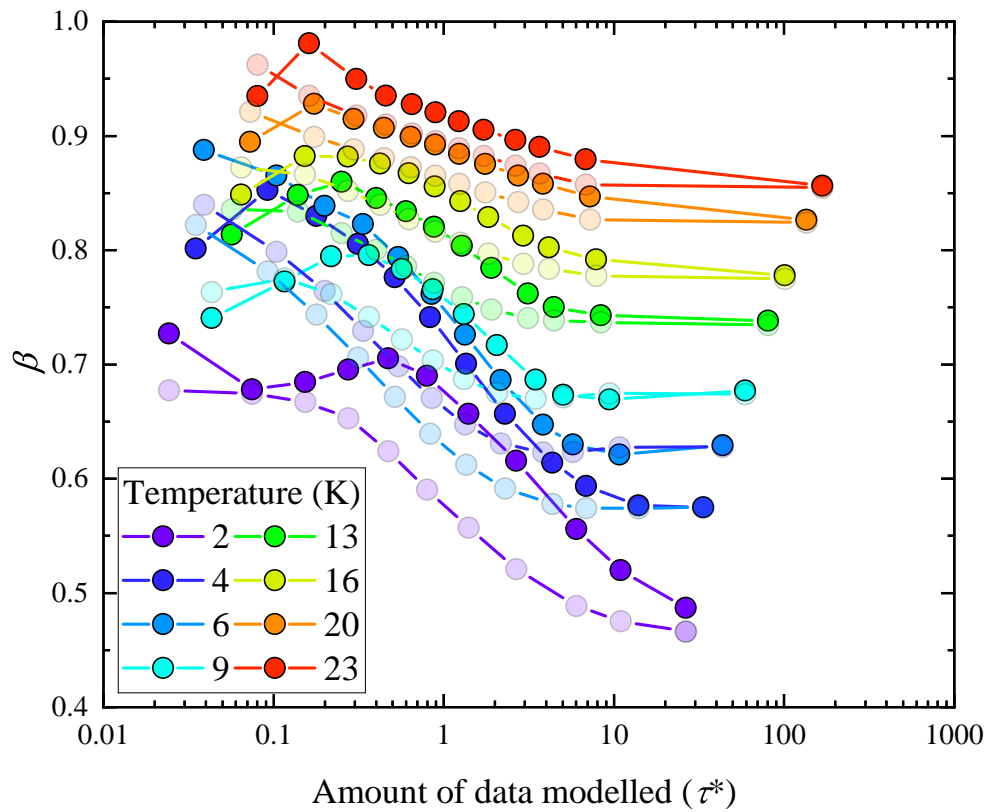

Figure S53: Comparison of Fig. S47 with  $M_{\text{eq}} = 0$  (transparent) and Fig. S39 with  $M_{\text{eq}}$  free (opaque).

## S2.4 DC decays full range fitting

DC decay magnetisation measurements of polycrystalline samples of  $[\text{Dy}(\text{Dtp})_2][\text{Al}\{\text{OC}(\text{CF}_3)_3\}_4]$  secured in eicosane as a function of temperature were made in a Quantum Design MPMS3 SQUID magnetometer. The resultant decay traces were analysed using Eq. 11 with different constraints on the fitted parameters as shown in Table S15 and described in Section 4.3.1. The  $\tau^*$  and  $\beta$  parameters extracted from these fits were used to calculate  $\tau_{\text{mode}}$ ,  $\langle \tau \rangle$  and  $e^{\langle \ln[\tau] \rangle}$ . These four measures of  $\tau$  were then compared to the  $\tau_{\text{debye}}$  extracted from Waveform measurements of  $[\text{Dy}(\text{Dtp})_2][\text{Al}\{\text{OC}(\text{CF}_3)_3\}_4]$  for all ways of fitting Eq. 11 to determine the best method and metric for characterising SMMs using DC decay measurements.

Fitting the full range of DC decay data taken shows unexpected behaviour at long timescales. These bumps cannot be fitted using an additional mono- or stretched exponential function Fig. S54-S77. We attribute this deviation to small magnetic impurities. Noticeably, the fitting algorithm ignores the deviation from the main stretched exponential function used to model the data. This is due to the very low moment where these impurities dominate ( $< 1\%$  of  $M_0$ ).

Table S15: Labelling scheme for different methods of fitting Eq. 11. As the superconducting magnet has been calibrated to give  $H = 0$  then the target  $M_{\text{eq}} = 0$ .

|                      | $M_0$ | $\beta$ | $t_{\text{offset}}$ | $M_{\text{eq}}$ | $\tau^*$ |
|----------------------|-------|---------|---------------------|-----------------|----------|
| Freely fit           | F     | F       | F                   | F               | F        |
| Fixed to 0           | -     | -       | 0                   | -               | -        |
| Fixed to first point | X     | -       | -                   | -               | -        |
| Fixed to last point  | -     | -       | -                   | L               | -        |
| Fixed to target      | -     | -       | -                   | 0               | -        |



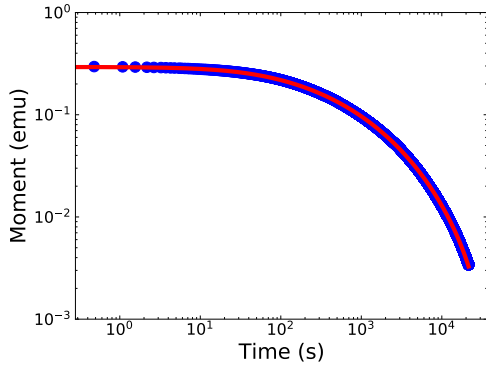

| Parameter               | Fit result             | 2 K |
|-------------------------|------------------------|-----|
| $M_0$ (emu)             | 0.491                  | F   |
| $\beta$                 | 0.342                  | F   |
| $t_{\text{offset}}$ (s) | 36.19                  | F   |
| $M_{\text{eq}}$ (emu)   | $-1.97 \times 10^{-3}$ | F   |
| $\tau^*$ (s)            | 256.62                 | F   |

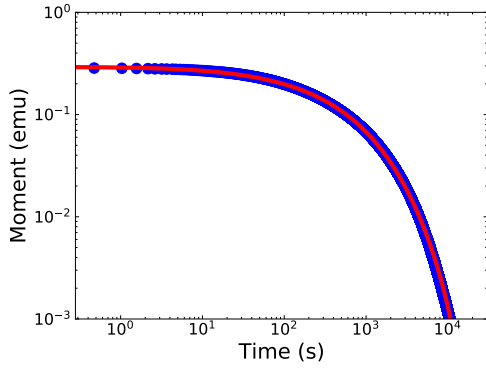

| Parameter               | Fit result             | 4 K |
|-------------------------|------------------------|-----|
| $M_0$ (emu)             | 0.309                  | F   |
| $\beta$                 | 0.538                  | F   |
| $t_{\text{offset}}$ (s) | 2.09                   | F   |
| $M_{\text{eq}}$ (emu)   | $-3.40 \times 10^{-4}$ | F   |
| $\tau^*$ (s)            | 462.83                 | F   |

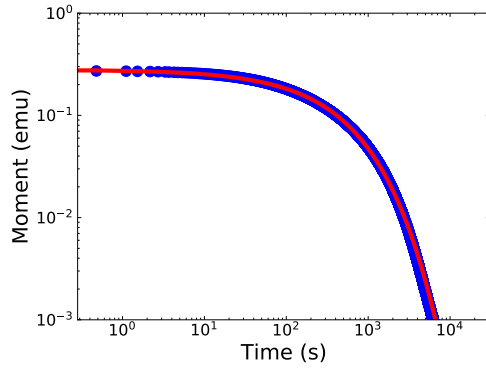

| Parameter               | Fit result            | 6 K |
|-------------------------|-----------------------|-----|
| $M_0$ (emu)             | 0.280                 | F   |
| $\beta$                 | 0.615                 | F   |
| $t_{\text{offset}}$ (s) | $3.09 \times 10^{-2}$ | F   |
| $M_{\text{eq}}$ (emu)   | $5.28 \times 10^{-5}$ | F   |
| $\tau^*$ (s)            | 392.90                | F   |

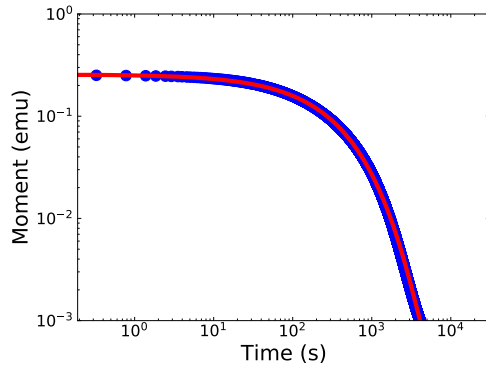

| Parameter               | Fit result            | 9 K |
|-------------------------|-----------------------|-----|
| $M_0$ (emu)             | 0.256                 | F   |
| $\beta$                 | 0.669                 | F   |
| $t_{\text{offset}}$ (s) | $1.47 \times 10^{-2}$ | F   |
| $M_{\text{eq}}$ (emu)   | $2.18 \times 10^{-4}$ | F   |
| $\tau^*$ (s)            | 295.95                | F   |

Figure S54: Full DC decay curves fitted to Eq. 11 with all parameters fitted freely.

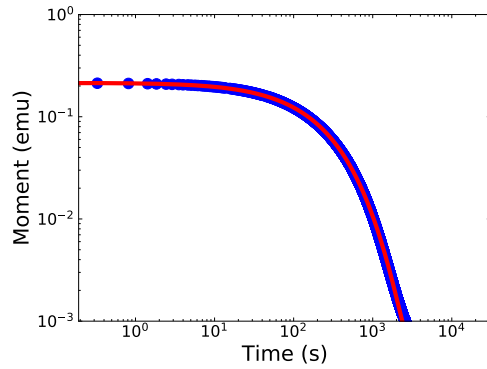

| Parameter               | Fit result            | 13 K |
|-------------------------|-----------------------|------|
| $M_0$ (emu)             | 0.226                 | F    |
| $\beta$                 | 0.711                 | F    |
| $t_{\text{offset}}$ (s) | 3.54                  | F    |
| $M_{\text{eq}}$ (emu)   | $2.05 \times 10^{-4}$ | F    |
| $\tau^*$ (s)            | 206.70                | F    |

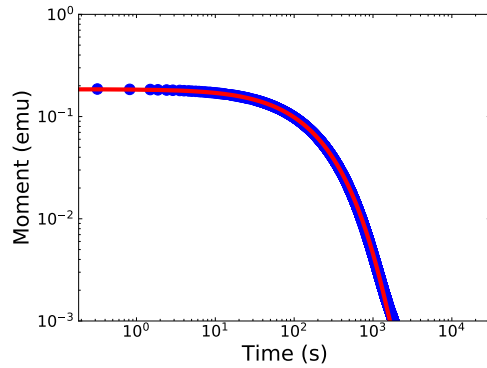

| Parameter               | Fit result            | 16 K |
|-------------------------|-----------------------|------|
| $M_0$ (emu)             | 0.233                 | F    |
| $\beta$                 | 0.708                 | F    |
| $t_{\text{offset}}$ (s) | 18.45                 | F    |
| $M_{\text{eq}}$ (emu)   | $1.45 \times 10^{-4}$ | F    |
| $\tau^*$ (s)            | 145.20                | F    |

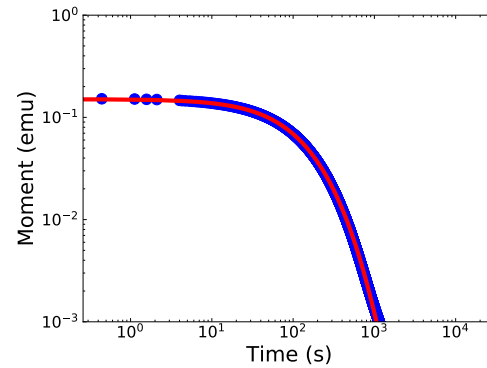

| Parameter               | Fit result            | 20 K |
|-------------------------|-----------------------|------|
| $M_0$ (emu)             | 0.567                 | F    |
| $\beta$                 | 0.615                 | F    |
| $t_{\text{offset}}$ (s) | 88.65                 | F    |
| $M_{\text{eq}}$ (emu)   | $7.81 \times 10^{-5}$ | F    |
| $\tau^*$ (s)            | 56.08                 | F    |

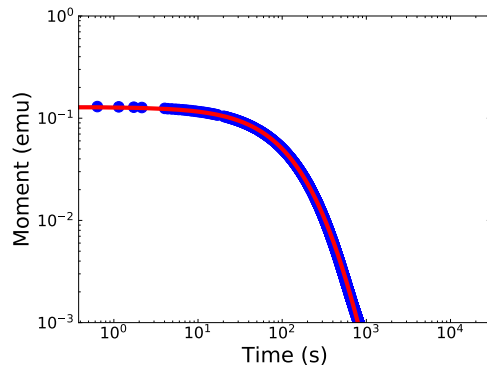

| Parameter               | Fit result            | 23 K |
|-------------------------|-----------------------|------|
| $M_0$ (emu)             | 1737.4                | F    |
| $\beta$                 | 0.272                 | F    |
| $t_{\text{offset}}$ (s) | 306.75                | F    |
| $M_{\text{eq}}$ (emu)   | $4.61 \times 10^{-4}$ | F    |
| $\tau^*$ (s)            | $3.48 \times 10^{-5}$ | F    |

Figure S55: Full DC decay curves fitted to Eq. 11 with all parameters fitted freely.

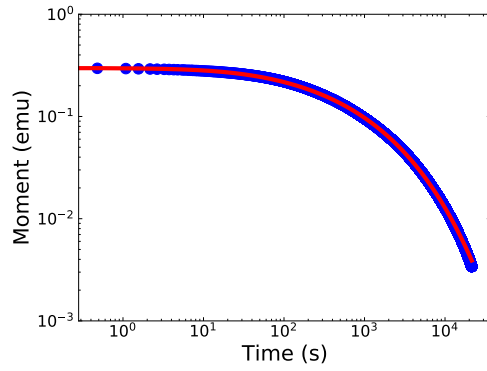

| Parameter               | Fit result | 2 K |
|-------------------------|------------|-----|
| $M_0$ (emu)             | 0.404      | F   |
| $\beta$                 | 0.387      | F   |
| $t_{\text{offset}}$ (s) | 18.93      | F   |
| $M_{\text{eq}}$ (emu)   | 0          | 0   |
| $\tau^*$ (s)            | 405.63     | F   |

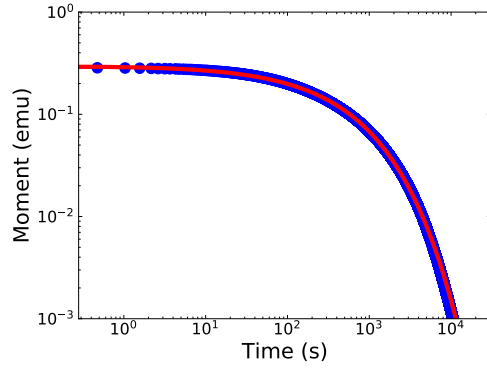

| Parameter               | Fit result | 4 K |
|-------------------------|------------|-----|
| $M_0$ (emu)             | 0.304      | F   |
| $\beta$                 | 0.549      | F   |
| $t_{\text{offset}}$ (s) | 0.89       | F   |
| $M_{\text{eq}}$ (emu)   | 0          | 0   |
| $\tau^*$ (s)            | 476.83     | F   |

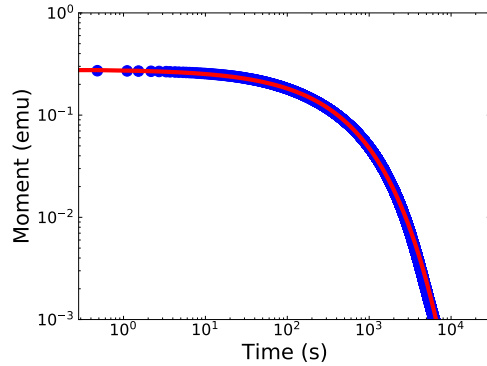

| Parameter               | Fit result | 6 K |
|-------------------------|------------|-----|
| $M_0$ (emu)             | 0.280      | F   |
| $\beta$                 | 0.614      | F   |
| $t_{\text{offset}}$ (s) | 0.04       | F   |
| $M_{\text{eq}}$ (emu)   | 0          | 0   |
| $\tau^*$ (s)            | 392.18     | F   |

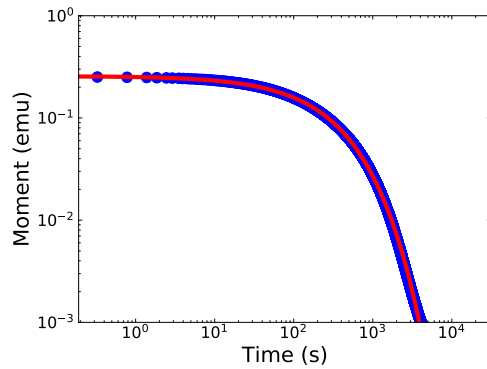

| Parameter               | Fit result | 9 K |
|-------------------------|------------|-----|
| $M_0$ (emu)             | 0.258      | F   |
| $\beta$                 | 0.664      | F   |
| $t_{\text{offset}}$ (s) | 0.12       | F   |
| $M_{\text{eq}}$ (emu)   | 0          | 0   |
| $\tau^*$ (s)            | 294.07     | F   |

Figure S56: Full DC decay curves fitted to Eq. 11 with  $M_{\text{eq}} = 0$  set to target and all other parameters fitted freely.

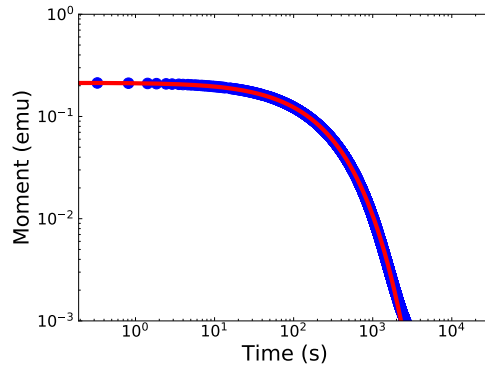

| Parameter               | Fit result | 13 K |
|-------------------------|------------|------|
| $M_0$ (emu)             | 0.234      | F    |
| $\beta$                 | 0.697      | F    |
| $t_{\text{offset}}$ (s) | 6.58       | F    |
| $M_{\text{eq}}$ (emu)   | 0          | 0    |
| $\tau^*$ (s)            | 200.13     | F    |

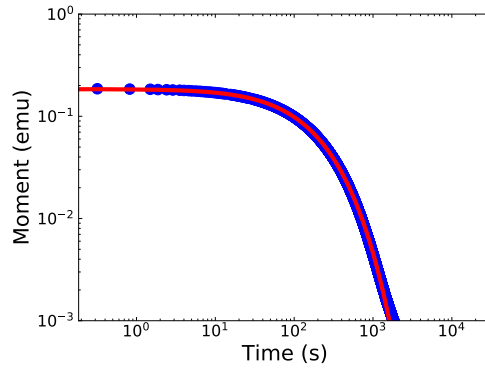

| Parameter               | Fit result | 16 K |
|-------------------------|------------|------|
| $M_0$ (emu)             | 0.260      | F    |
| $\beta$                 | 0.683      | F    |
| $t_{\text{offset}}$ (s) | 27.68      | F    |
| $M_{\text{eq}}$ (emu)   | 0          | 0    |
| $\tau^*$ (s)            | 133.14     | F    |

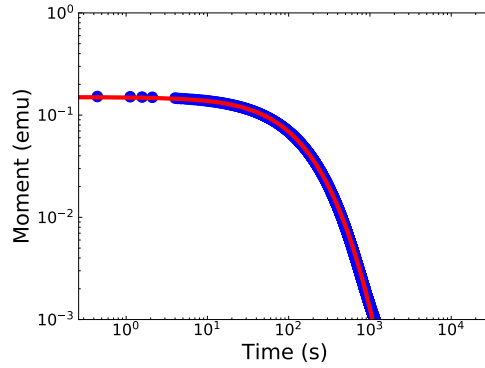

| Parameter               | Fit result | 20 K |
|-------------------------|------------|------|
| $M_0$ (emu)             | 1.922      | F    |
| $\beta$                 | 0.512      | F    |
| $t_{\text{offset}}$ (s) | 146.46     | F    |
| $M_{\text{eq}}$ (emu)   | 0          | 0    |
| $\tau^*$ (s)            | 23.54      | F    |

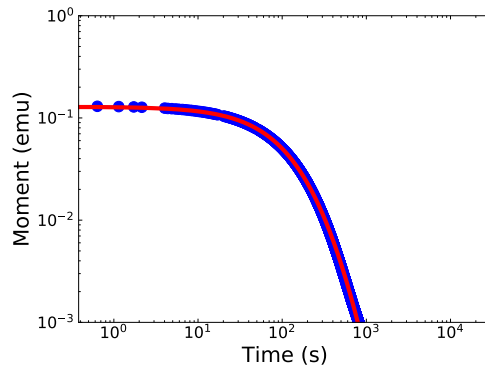

| Parameter               | Fit result             | 23 K |
|-------------------------|------------------------|------|
| $M_0$ (emu)             | $1.169 \times 10^5$    | F    |
| $\beta$                 | 0.242                  | F    |
| $t_{\text{offset}}$ (s) | 316.86                 | F    |
| $M_{\text{eq}}$ (emu)   | 0                      | 0    |
| $\tau^*$ (s)            | $6.350 \times 10^{-3}$ | F    |

Figure S57: Full DC decay curves fitted to Eq. 11 with  $M_{\text{eq}} = 0$  set to target and all other parameters fitted freely.

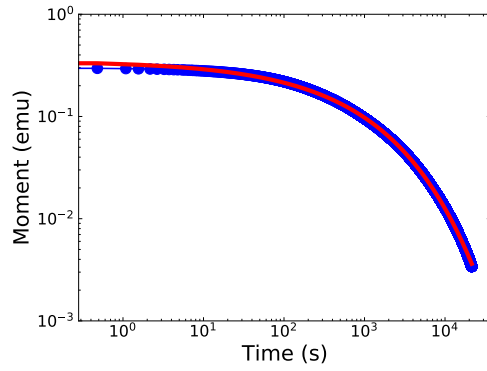

| Parameter               | Fit result | 2 K |
|-------------------------|------------|-----|
| $M_0$ (emu)             | 0.350      | F   |
| $\beta$                 | 0.415      | F   |
| $t_{\text{offset}}$ (s) | 0          | 0   |
| $M_{\text{eq}}$ (emu)   | 0          | 0   |
| $\tau^*$ (s)            | 553.73     | F   |

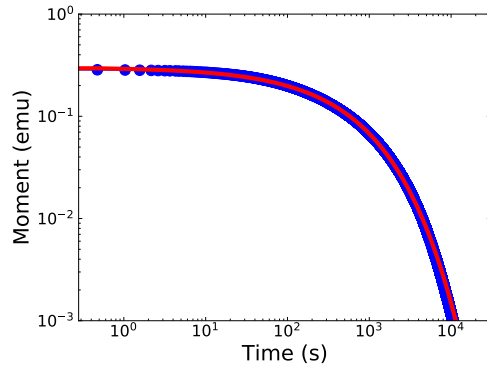

| Parameter               | Fit result | 4 K |
|-------------------------|------------|-----|
| $M_0$ (emu)             | 0.301      | F   |
| $\beta$                 | 0.551      | F   |
| $t_{\text{offset}}$ (s) | 0          | 0   |
| $M_{\text{eq}}$ (emu)   | 0          | 0   |
| $\tau^*$ (s)            | 482.48     | F   |

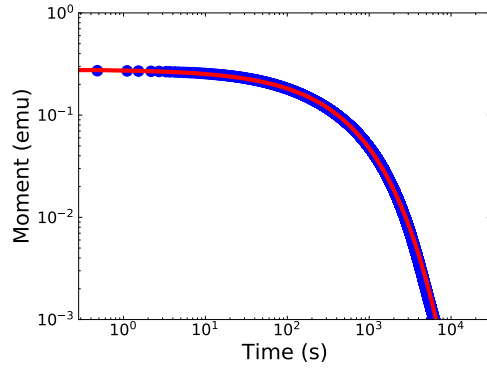

| Parameter               | Fit result | 6 K |
|-------------------------|------------|-----|
| $M_0$ (emu)             | 0.280      | F   |
| $\beta$                 | 0.614      | F   |
| $t_{\text{offset}}$ (s) | 0          | 0   |
| $M_{\text{eq}}$ (emu)   | 0          | 0   |
| $\tau^*$ (s)            | 392.45     | F   |

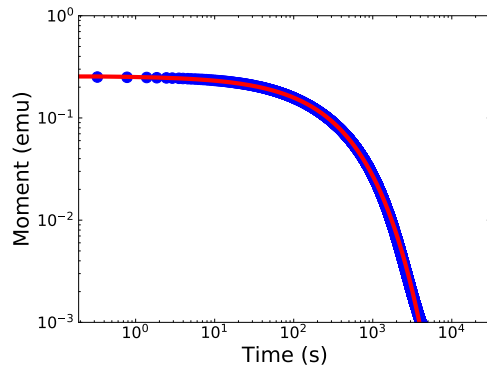

| Parameter               | Fit result | 9 K |
|-------------------------|------------|-----|
| $M_0$ (emu)             | 0.257      | F   |
| $\beta$                 | 0.664      | F   |
| $t_{\text{offset}}$ (s) | 0          | 0   |
| $M_{\text{eq}}$ (emu)   | 0          | 0   |
| $\tau^*$ (s)            | 294.54     | F   |

Figure S58: Full DC decay curves fitted to Eq. 11 with  $M_{\text{eq}} = 0$  set to target,  $t_{\text{offset}} = 0$  and all other parameters fitted freely.

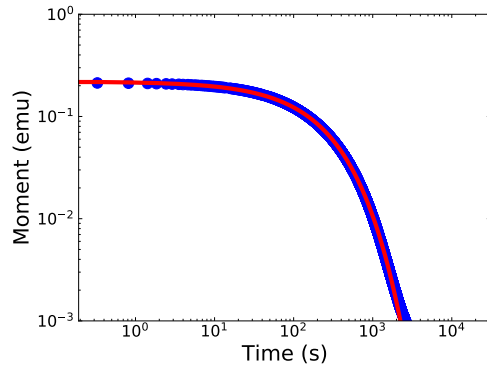

| Parameter               | Fit result | 13 K |
|-------------------------|------------|------|
| $M_0$ (emu)             | 0.219      | F    |
| $\beta$                 | 0.716      | F    |
| $t_{\text{offset}}$ (s) | 0          | 0    |
| $M_{\text{eq}}$ (emu)   | 0          | 0    |
| $\tau^*$ (s)            | 212.98     | F    |

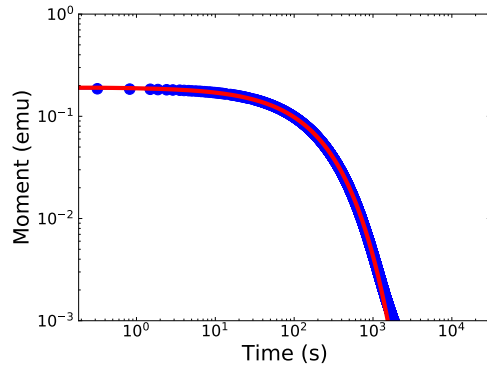

| Parameter               | Fit result | 16 K |
|-------------------------|------------|------|
| $M_0$ (emu)             | 0.192      | F    |
| $\beta$                 | 0.752      | F    |
| $t_{\text{offset}}$ (s) | 0          | 0    |
| $M_{\text{eq}}$ (emu)   | 0          | 0    |
| $\tau^*$ (s)            | 169.37     | F    |

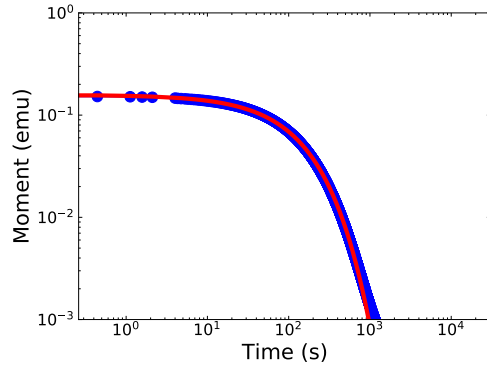

| Parameter               | Fit result | 20 K |
|-------------------------|------------|------|
| $M_0$ (emu)             | 0.158      | F    |
| $\beta$                 | 0.798      | F    |
| $t_{\text{offset}}$ (s) | 0          | 0    |
| $M_{\text{eq}}$ (emu)   | 0          | 0    |
| $\tau^*$ (s)            | 126.32     | F    |

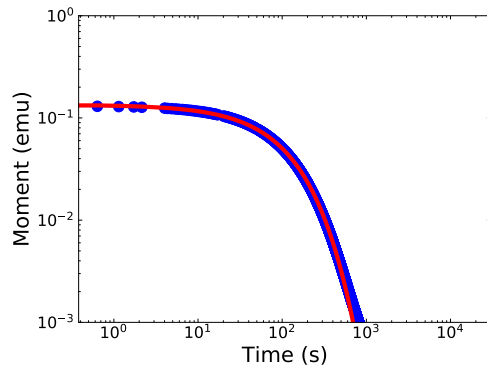

| Parameter               | Fit result | 23 K |
|-------------------------|------------|------|
| $M_0$ (emu)             | 0.135      | F    |
| $\beta$                 | 0.829      | F    |
| $t_{\text{offset}}$ (s) | 0          | 0    |
| $M_{\text{eq}}$ (emu)   | 0          | 0    |
| $\tau^*$ (s)            | 102.20     | F    |

Figure S59: Full DC decay curves fitted to Eq. 11 with  $M_{\text{eq}} = 0$  set to target,  $t_{\text{offset}} = 0$  and all other parameters fitted freely.

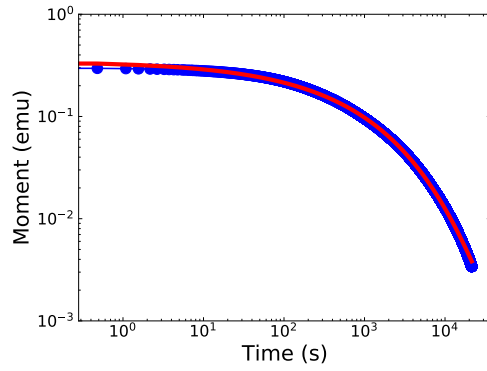

| Parameter               | Fit result             | 2 K |
|-------------------------|------------------------|-----|
| $M_0$ (emu)             | 0.347                  | F   |
| $\beta$                 | 0.421                  | F   |
| $t_{\text{offset}}$ (s) | 0                      | 0   |
| $M_{\text{eq}}$ (emu)   | $4.304 \times 10^{-4}$ | F   |
| $\tau^*$ (s)            | 565.29                 | F   |

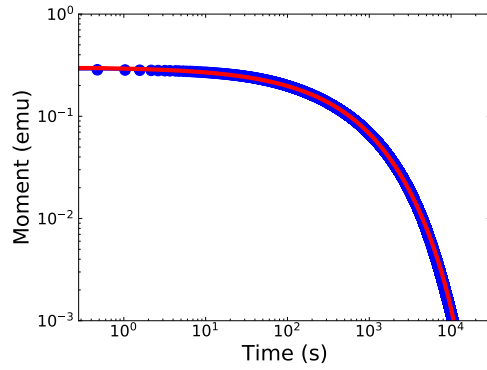

| Parameter               | Fit result              | 4 K |
|-------------------------|-------------------------|-----|
| $M_0$ (emu)             | 0.304                   | F   |
| $\beta$                 | 0.544                   | F   |
| $t_{\text{offset}}$ (s) | 0                       | 0   |
| $M_{\text{eq}}$ (emu)   | $-2.918 \times 10^{-4}$ | F   |
| $\tau^*$ (s)            | 476.50                  | F   |

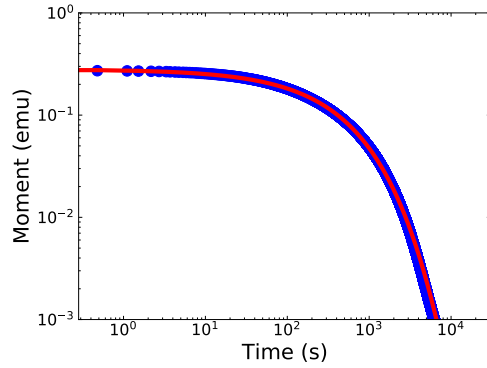

| Parameter               | Fit result             | 6 K |
|-------------------------|------------------------|-----|
| $M_0$ (emu)             | 0.280                  | F   |
| $\beta$                 | 0.615                  | F   |
| $t_{\text{offset}}$ (s) | 0                      | 0   |
| $M_{\text{eq}}$ (emu)   | $5.328 \times 10^{-5}$ | F   |
| $\tau^*$ (s)            | 393.11                 | F   |

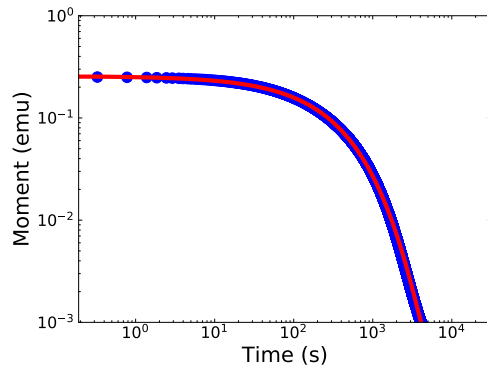

| Parameter               | Fit result             | 9 K |
|-------------------------|------------------------|-----|
| $M_0$ (emu)             | 0.256                  | F   |
| $\beta$                 | 0.670                  | F   |
| $t_{\text{offset}}$ (s) | 0                      | 0   |
| $M_{\text{eq}}$ (emu)   | $2.178 \times 10^{-4}$ | F   |
| $\tau^*$ (s)            | 296.02                 | F   |

Figure S60: Full DC decay curves fitted to Eq. 11 with  $t_{\text{offset}} = 0$  and all other parameters fitted freely.

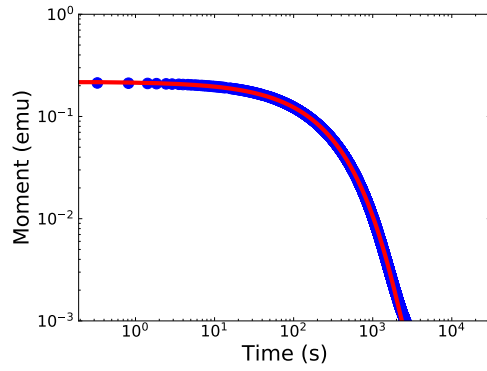

| Parameter               | Fit result             | 13 K |
|-------------------------|------------------------|------|
| $M_0$ (emu)             | 0.219                  | F    |
| $\beta$                 | 0.722                  | F    |
| $t_{\text{offset}}$ (s) | 0                      | 0    |
| $M_{\text{eq}}$ (emu)   | $2.114 \times 10^{-4}$ | F    |
| $\tau^*$ (s)            | 213.81                 | F    |

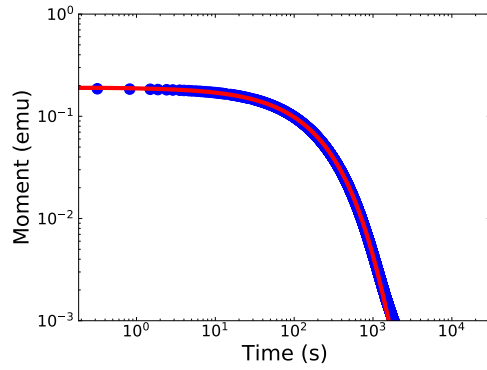

| Parameter               | Fit result             | 16 K |
|-------------------------|------------------------|------|
| $M_0$ (emu)             | 0.192                  | F    |
| $\beta$                 | 0.757                  | F    |
| $t_{\text{offset}}$ (s) | 0                      | 0    |
| $M_{\text{eq}}$ (emu)   | $1.581 \times 10^{-4}$ | F    |
| $\tau^*$ (s)            | 169.80                 | F    |

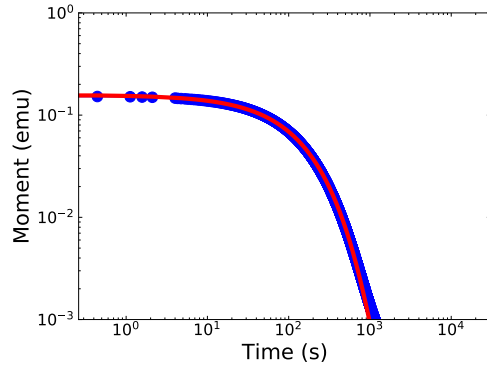

| Parameter               | Fit result             | 20 K |
|-------------------------|------------------------|------|
| $M_0$ (emu)             | 0.157                  | F    |
| $\beta$                 | 0.802                  | F    |
| $t_{\text{offset}}$ (s) | 0                      | 0    |
| $M_{\text{eq}}$ (emu)   | $9.551 \times 10^{-5}$ | F    |
| $\tau^*$ (s)            | 126.50                 | F    |

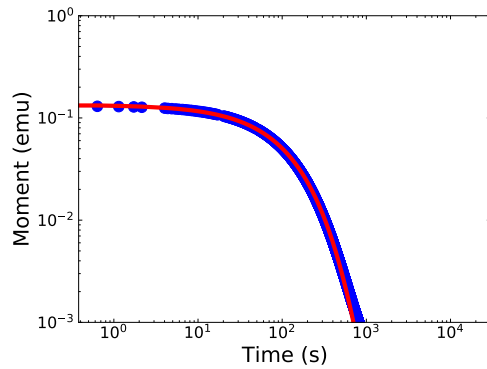

| Parameter               | Fit result             | 23 K |
|-------------------------|------------------------|------|
| $M_0$ (emu)             | 0.134                  | F    |
| $\beta$                 | 0.832                  | F    |
| $t_{\text{offset}}$ (s) | 0                      | 0    |
| $M_{\text{eq}}$ (emu)   | $6.426 \times 10^{-5}$ | F    |
| $\tau^*$ (s)            | 102.29                 | F    |

Figure S61: Full DC decay curves fitted to Eq. 11 with  $t_{\text{offset}} = 0$  and all other parameters fitted freely.



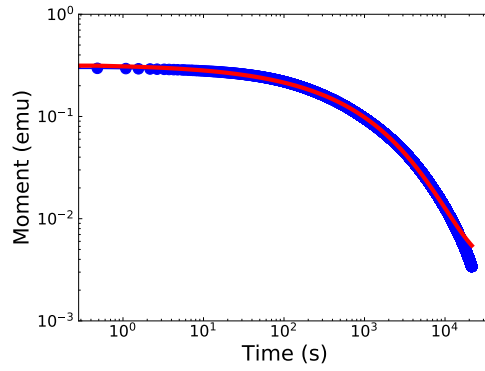

| Parameter               | Fit result             | 2 K |
|-------------------------|------------------------|-----|
| $M_0$ (emu)             | 0.326                  | F   |
| $\beta$                 | 0.462                  | F   |
| $t_{\text{offset}}$ (s) | 0                      | 0   |
| $M_{\text{eq}}$ (emu)   | $3.411 \times 10^{-3}$ | L   |
| $\tau^*$ (s)            | 645.21                 | F   |

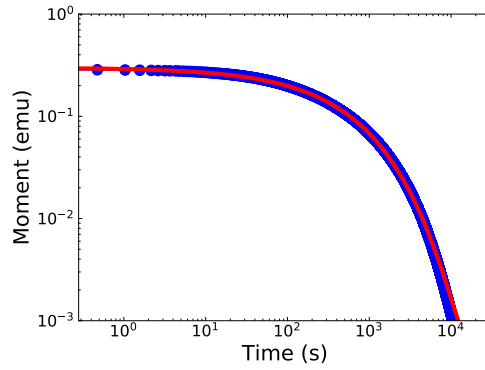

| Parameter               | Fit result             | 4 K |
|-------------------------|------------------------|-----|
| $M_0$ (emu)             | 0.300                  | F   |
| $\beta$                 | 0.556                  | F   |
| $t_{\text{offset}}$ (s) | 0                      | 0   |
| $M_{\text{eq}}$ (emu)   | $2.546 \times 10^{-4}$ | L   |
| $\tau^*$ (s)            | 487.45                 | F   |

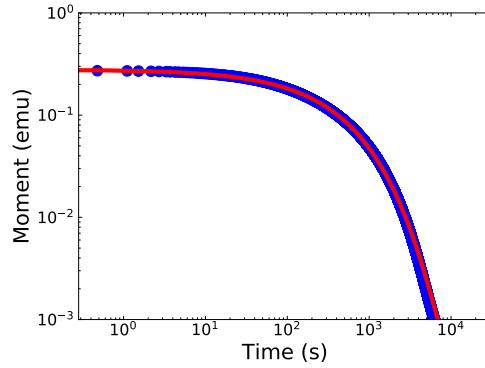

| Parameter               | Fit result             | 6 K |
|-------------------------|------------------------|-----|
| $M_0$ (emu)             | 0.279                  | F   |
| $\beta$                 | 0.619                  | F   |
| $t_{\text{offset}}$ (s) | 0                      | 0   |
| $M_{\text{eq}}$ (emu)   | $1.971 \times 10^{-4}$ | L   |
| $\tau^*$ (s)            | 394.82                 | F   |

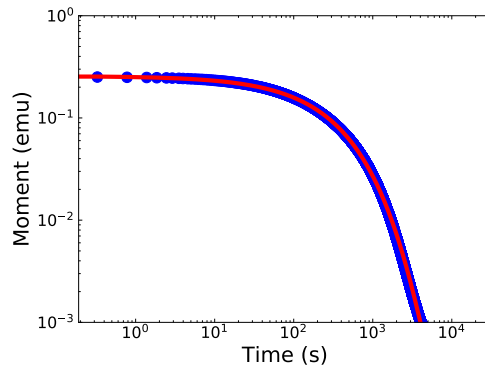

| Parameter               | Fit result             | 9 K |
|-------------------------|------------------------|-----|
| $M_0$ (emu)             | 0.257                  | F   |
| $\beta$                 | 0.668                  | F   |
| $t_{\text{offset}}$ (s) | 0                      | 0   |
| $M_{\text{eq}}$ (emu)   | $1.452 \times 10^{-4}$ | L   |
| $\tau^*$ (s)            | 295.54                 | F   |

Figure S62: Full DC decay curves fitted to Eq. 11 with  $t_{\text{offset}} = 0$ ,  $M_{\text{eq}}$  set to the last measured values and all other parameters fitted freely.

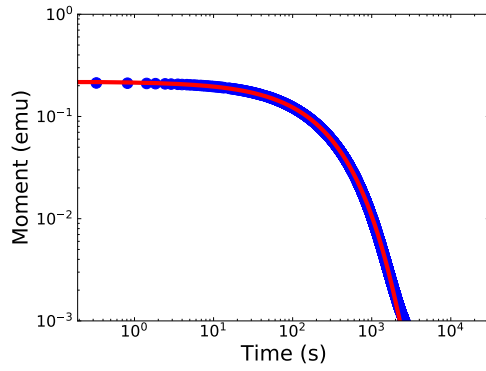

| Parameter               | Fit result             | 13 K |
|-------------------------|------------------------|------|
| $M_0$ (emu)             | 0.219                  | F    |
| $\beta$                 | 0.718                  | F    |
| $t_{\text{offset}}$ (s) | 0                      | 0    |
| $M_{\text{eq}}$ (emu)   | $6.649 \times 10^{-5}$ | L    |
| $\tau^*$ (s)            | 213.25                 | F    |

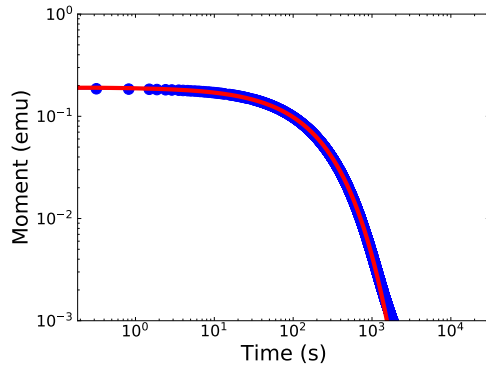

| Parameter               | Fit result             | 16 K |
|-------------------------|------------------------|------|
| $M_0$ (emu)             | 0.192                  | F    |
| $\beta$                 | 0.753                  | F    |
| $t_{\text{offset}}$ (s) | 0                      | 0    |
| $M_{\text{eq}}$ (emu)   | $3.249 \times 10^{-5}$ | L    |
| $\tau^*$ (s)            | 169.46                 | F    |

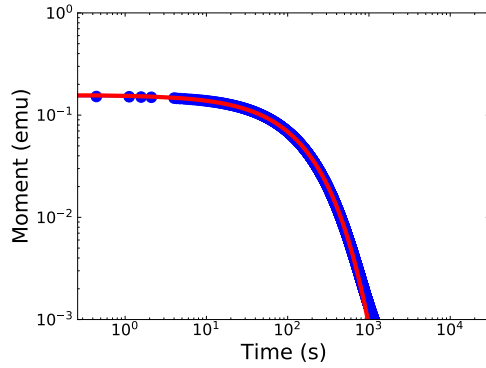

| Parameter               | Fit result             | 20 K |
|-------------------------|------------------------|------|
| $M_0$ (emu)             | 0.158                  | F    |
| $\beta$                 | 0.799                  | F    |
| $t_{\text{offset}}$ (s) | 0                      | 0    |
| $M_{\text{eq}}$ (emu)   | $1.863 \times 10^{-5}$ | L    |
| $\tau^*$ (s)            | 126.35                 | F    |

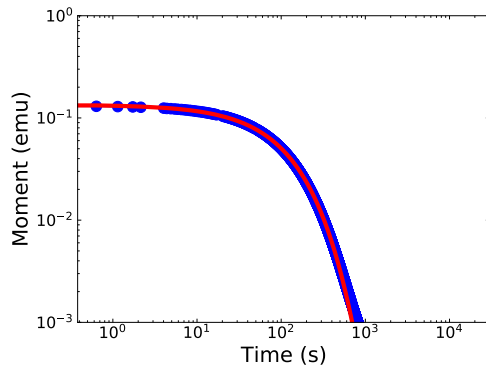

| Parameter               | Fit result             | 23 K |
|-------------------------|------------------------|------|
| $M_0$ (emu)             | 0.135                  | F    |
| $\beta$                 | 0.829                  | F    |
| $t_{\text{offset}}$ (s) | 0                      | 0    |
| $M_{\text{eq}}$ (emu)   | $1.558 \times 10^{-5}$ | L    |
| $\tau^*$ (s)            | 102.22                 | F    |

Figure S63: Full DC decay curves fitted to Eq. 11 with  $t_{\text{offset}} = 0$ ,  $M_{\text{eq}}$  set to the last measured values and all other parameters fitted freely.

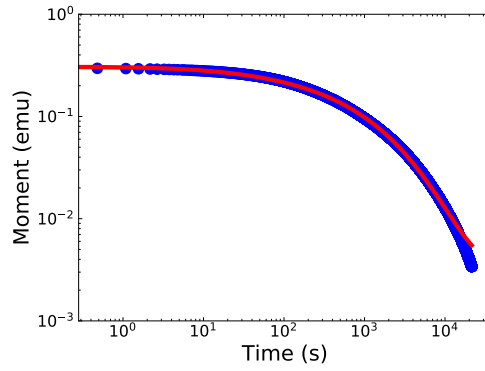

| Parameter               | Fit result             | 2 K |
|-------------------------|------------------------|-----|
| $M_0$ (emu)             | 0.331                  | F   |
| $\beta$                 | 0.458                  | F   |
| $t_{\text{offset}}$ (s) | 2.24                   | F   |
| $M_{\text{eq}}$ (emu)   | $3.411 \times 10^{-3}$ | L   |
| $\tau^*$ (s)            | 623.59                 | F   |

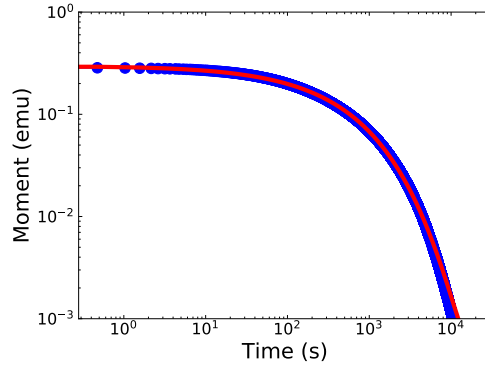

| Parameter               | Fit result             | 4 K |
|-------------------------|------------------------|-----|
| $M_0$ (emu)             | 0.301                  | F   |
| $\beta$                 | 0.555                  | F   |
| $t_{\text{offset}}$ (s) | 0.39                   | F   |
| $M_{\text{eq}}$ (emu)   | $2.546 \times 10^{-4}$ | L   |
| $\tau^*$ (s)            | 484.82                 | F   |

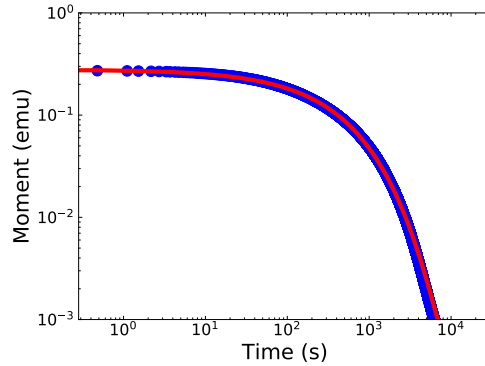

| Parameter               | Fit result             | 6 K |
|-------------------------|------------------------|-----|
| $M_0$ (emu)             | 0.279                  | F   |
| $\beta$                 | 0.619                  | F   |
| $t_{\text{offset}}$ (s) | $1.37 \times 10^{-2}$  | F   |
| $M_{\text{eq}}$ (emu)   | $1.971 \times 10^{-4}$ | L   |
| $\tau^*$ (s)            | 394.70                 | F   |

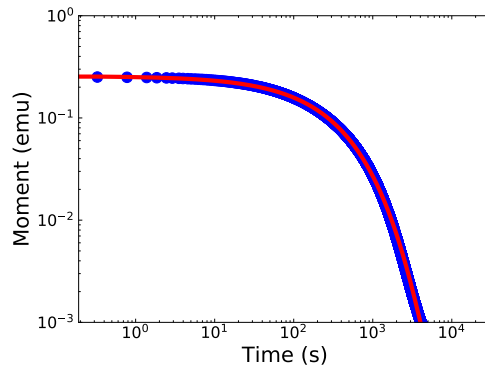

| Parameter               | Fit result             | 9 K |
|-------------------------|------------------------|-----|
| $M_0$ (emu)             | 0.257                  | F   |
| $\beta$                 | 0.668                  | F   |
| $t_{\text{offset}}$ (s) | $3.12 \times 10^{-4}$  | F   |
| $M_{\text{eq}}$ (emu)   | $1.452 \times 10^{-4}$ | L   |
| $\tau^*$ (s)            | 295.41                 | F   |

Figure S64: Full DC decay curves fitted to Eq. 11 with  $M_{\text{eq}}$  set to the last measured point and all other parameters fitted freely.

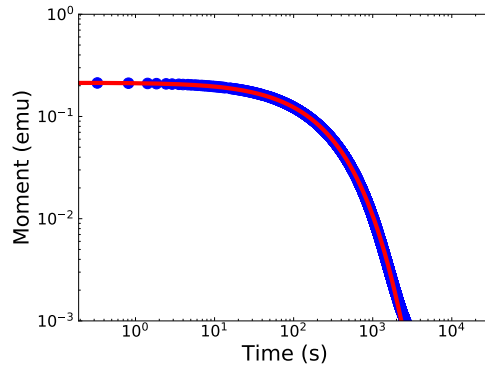

| Parameter               | Fit result             | 13K |
|-------------------------|------------------------|-----|
| $M_0$ (emu)             | 0.231                  | F   |
| $\beta$                 | 0.702                  | F   |
| $t_{\text{offset}}$ (s) | 5.43                   | F   |
| $M_{\text{eq}}$ (emu)   | $6.649 \times 10^{-5}$ | L   |
| $\tau^*$ (s)            | 202.56                 | F   |

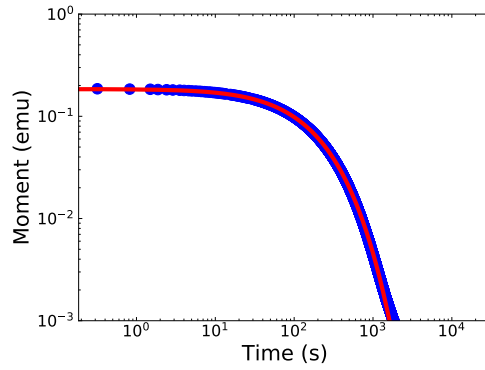

| Parameter               | Fit result             | 16 K |
|-------------------------|------------------------|------|
| $M_0$ (emu)             | 0.252                  | F    |
| $\beta$                 | 0.689                  | F    |
| $t_{\text{offset}}$ (s) | 25.22                  | F    |
| $M_{\text{eq}}$ (emu)   | $3.249 \times 10^{-5}$ | L    |
| $\tau^*$ (s)            | 136.31                 | F    |

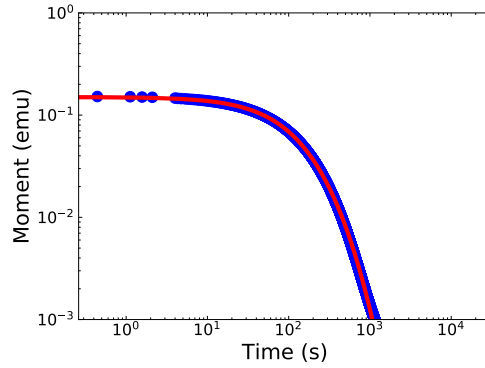

| Parameter               | Fit result             | 20 K |
|-------------------------|------------------------|------|
| $M_0$ (emu)             | 1.211                  | F    |
| $\beta$                 | 0.546                  | F    |
| $t_{\text{offset}}$ (s) | 126.74                 | F    |
| $M_{\text{eq}}$ (emu)   | $1.863 \times 10^{-5}$ | L    |
| $\tau^*$ (s)            | 32.95                  | F    |

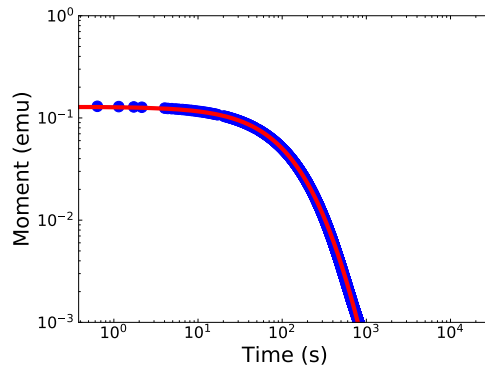

| Parameter               | Fit result             | 23 K |
|-------------------------|------------------------|------|
| $M_0$ (emu)             | $7.019 \times 10^4$    | F    |
| $\beta$                 | 0.250                  | F    |
| $t_{\text{offset}}$ (s) | 314.97                 | F    |
| $M_{\text{eq}}$ (emu)   | $1.558 \times 10^{-5}$ | L    |
| $\tau^*$ (s)            | $1.025 \times 10^{-2}$ | F    |

Figure S65: Full DC decay curves fitted to Eq. 11 with  $M_{\text{eq}}$  set to the last measured point and all other parameters fitted freely.

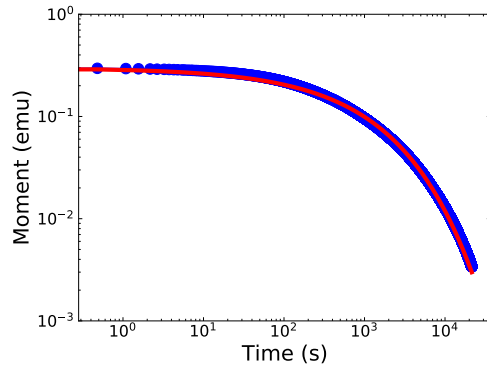

| Parameter               | Fit result | 2 K |
|-------------------------|------------|-----|
| $M_0$ (emu)             | 0.298      | X   |
| $\beta$                 | 0.466      | F   |
| $t_{\text{offset}}$ (s) | 0          | 0   |
| $M_{\text{eq}}$ (emu)   | 0          | 0   |
| $\tau^*$ (s)            | 814.62     | F   |

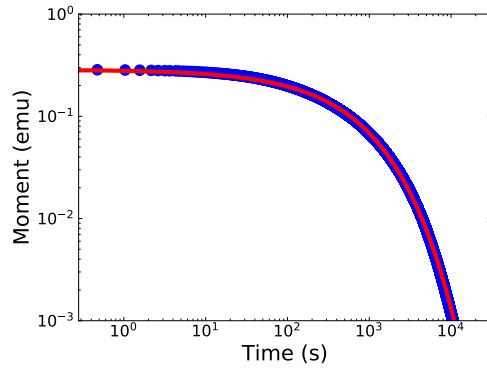

| Parameter               | Fit result | 4 K |
|-------------------------|------------|-----|
| $M_0$ (emu)             | 0.287      | X   |
| $\beta$                 | 0.575      | F   |
| $t_{\text{offset}}$ (s) | 0          | 0   |
| $M_{\text{eq}}$ (emu)   | 0          | 0   |
| $\tau^*$ (s)            | 534.35     | F   |

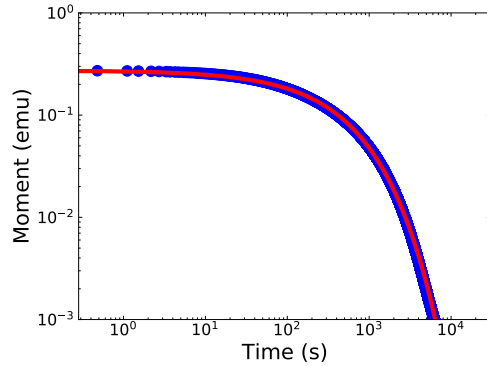

| Parameter               | Fit result | 2 K |
|-------------------------|------------|-----|
| $M_0$ (emu)             | 0.273      | X   |
| $\beta$                 | 0.628      | F   |
| $t_{\text{offset}}$ (s) | 0          | 0   |
| $M_{\text{eq}}$ (emu)   | 0          | 0   |
| $\tau^*$ (s)            | 410.98     | F   |

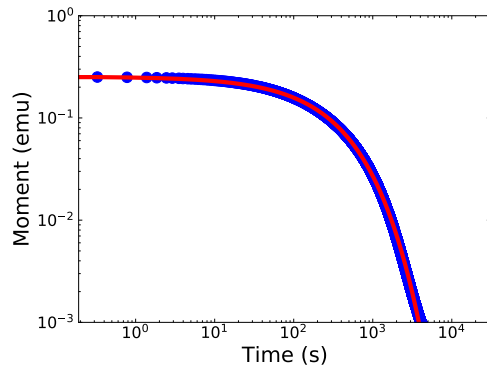

| Parameter               | Fit result | 9 K |
|-------------------------|------------|-----|
| $M_0$ (emu)             | 0.253      | X   |
| $\beta$                 | 0.674      | F   |
| $t_{\text{offset}}$ (s) | 0          | 0   |
| $M_{\text{eq}}$ (emu)   | 0          | 0   |
| $\tau^*$ (s)            | 302.69     | F   |

Figure S66: Full DC decay curves fitted to Eq. 11 with  $M_{\text{eq}} = 0$  set to target magnetisation,  $M_0$  fixed to first measured point at target field,  $t_{\text{offset}} = 0$  and  $\alpha$  and  $\beta$  fitted freely.

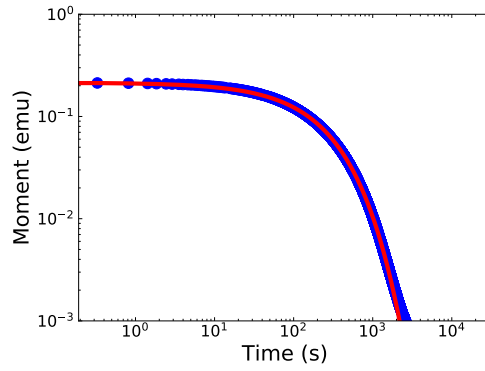

| Parameter               | Fit result | 13 K |
|-------------------------|------------|------|
| $M_0$ (emu)             | 0.214      | X    |
| $\beta$                 | 0.734      | F    |
| $t_{\text{offset}}$ (s) | 0          | 0    |
| $M_{\text{eq}}$ (emu)   | 0          | 0    |
| $\tau^*$ (s)            | 222.02     | F    |

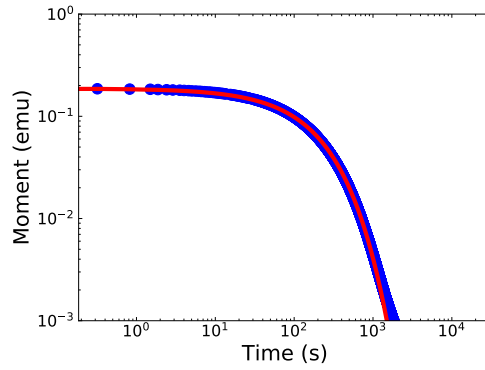

| Parameter               | Fit result | 16 K |
|-------------------------|------------|------|
| $M_0$ (emu)             | 0.187      | X    |
| $\beta$                 | 0.775      | F    |
| $t_{\text{offset}}$ (s) | 0          | 0    |
| $M_{\text{eq}}$ (emu)   | 0          | 0    |
| $\tau^*$ (s)            | 177.25     | F    |

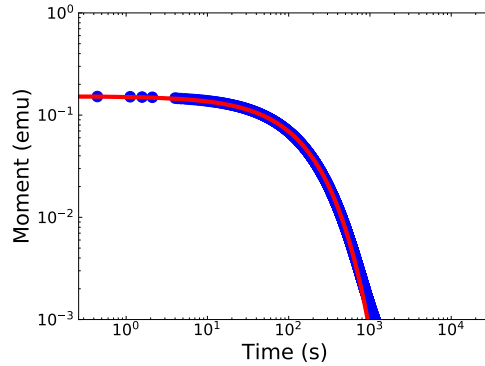

| Parameter               | Fit result | 20 K |
|-------------------------|------------|------|
| $M_0$ (emu)             | 0.153      | X    |
| $\beta$                 | 0.824      | F    |
| $t_{\text{offset}}$ (s) | 0          | 0    |
| $M_{\text{eq}}$ (emu)   | 0          | 0    |
| $\tau^*$ (s)            | 132.05     | F    |

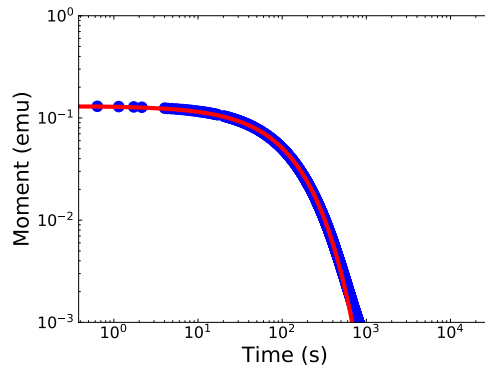

| Parameter               | Fit result | 23 K |
|-------------------------|------------|------|
| $M_0$ (emu)             | 0.131      | X    |
| $\beta$                 | 0.855      | F    |
| $t_{\text{offset}}$ (s) | 0          | 0    |
| $M_{\text{eq}}$ (emu)   | 0          | 0    |
| $\tau^*$ (s)            | 106.40     | F    |

Figure S67: Full DC decay curves fitted to Eq. 11 with  $M_{\text{eq}} = 0$  set to target magnetisation,  $M_0$  fixed to first measured point at target field,  $t_{\text{offset}} = 0$  and  $\alpha$  and  $\beta$  fitted freely.

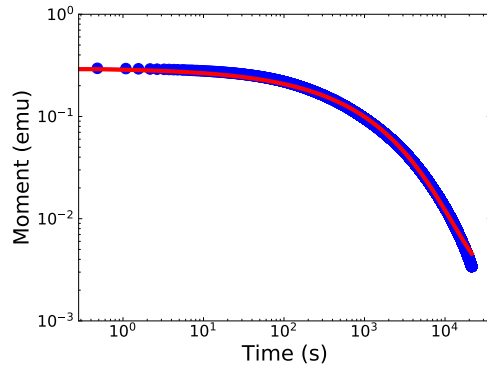

| Parameter               | Fit result             | 2 K |
|-------------------------|------------------------|-----|
| $M_0$ (emu)             | 0.298                  | X   |
| $\beta$                 | 0.487                  | F   |
| $t_{\text{offset}}$ (s) | 0                      | 0   |
| $M_{\text{eq}}$ (emu)   | $2.516 \times 10^{-3}$ | F   |
| $\tau^*$ (s)            | 796.55                 | F   |

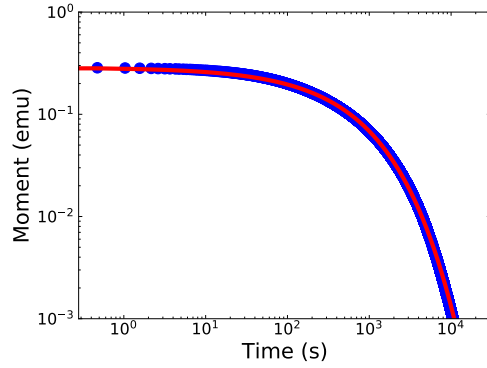

| Parameter               | Fit result             | 4 K |
|-------------------------|------------------------|-----|
| $M_0$ (emu)             | 0.287                  | X   |
| $\beta$                 | 0.575                  | F   |
| $t_{\text{offset}}$ (s) | 0                      | 0   |
| $M_{\text{eq}}$ (emu)   | $6.245 \times 10^{-6}$ | F   |
| $\tau^*$ (s)            | 534.32                 | F   |

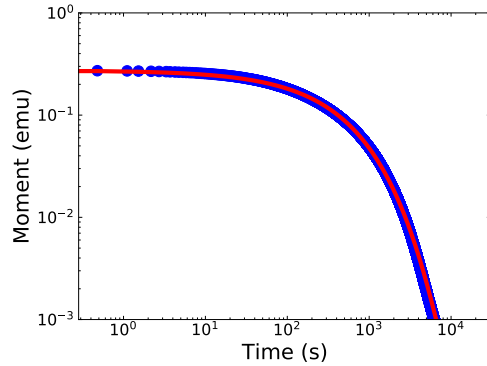

| Parameter               | Fit result             | 6 K |
|-------------------------|------------------------|-----|
| $M_0$ (emu)             | 0.273                  | X   |
| $\beta$                 | 0.629                  | F   |
| $t_{\text{offset}}$ (s) | 0                      | 0   |
| $M_{\text{eq}}$ (emu)   | $1.061 \times 10^{-4}$ | F   |
| $\tau^*$ (s)            | 410.58                 | F   |

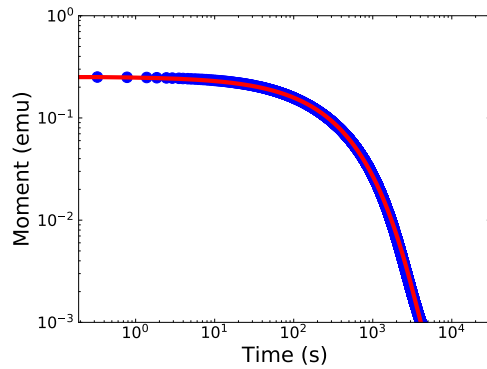

| Parameter               | Fit result             | 9 K |
|-------------------------|------------------------|-----|
| $M_0$ (emu)             | 0.253                  | X   |
| $\beta$                 | 0.677                  | F   |
| $t_{\text{offset}}$ (s) | 0                      | 0   |
| $M_{\text{eq}}$ (emu)   | $2.319 \times 10^{-4}$ | F   |
| $\tau^*$ (s)            | 301.98                 | F   |

Figure S68: Full DC decay curves fitted to Eq. 11 with  $M_0$  fixed to first measured point at target field,  $t_{\text{offset}} = 0$  and all other parameters fitted freely.

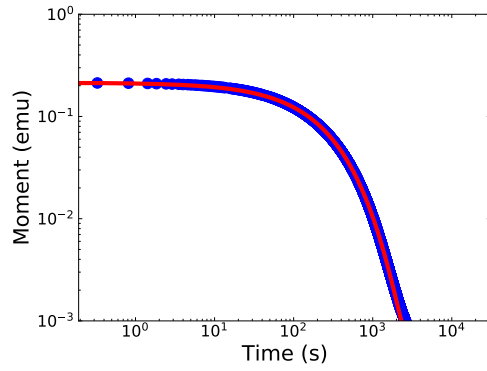

| Parameter               | Fit result             | 13 K |
|-------------------------|------------------------|------|
| $M_0$ (emu)             | 0.214                  | X    |
| $\beta$                 | 0.738                  | F    |
| $t_{\text{offset}}$ (s) | 0                      | 0    |
| $M_{\text{eq}}$ (emu)   | $2.248 \times 10^{-4}$ | F    |
| $\tau^*$ (s)            | 221.43                 | F    |

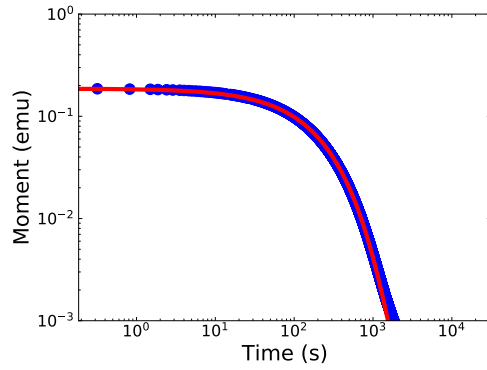

| Parameter               | Fit result             | 16 K |
|-------------------------|------------------------|------|
| $M_0$ (emu)             | 0.187                  | X    |
| $\beta$                 | 0.778                  | F    |
| $t_{\text{offset}}$ (s) | 0                      | 0    |
| $M_{\text{eq}}$ (emu)   | $1.686 \times 10^{-4}$ | F    |
| $\tau^*$ (s)            | 176.85                 | F    |

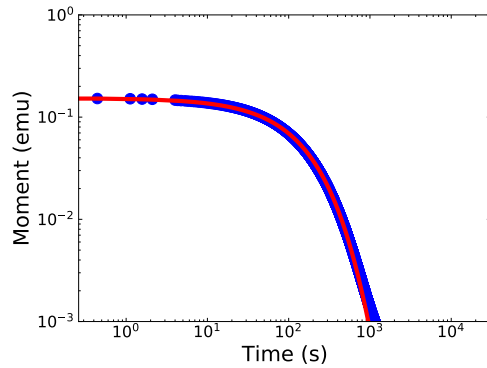

| Parameter               | Fit result             | 20 K |
|-------------------------|------------------------|------|
| $M_0$ (emu)             | 0.153                  | X    |
| $\beta$                 | 0.826                  | F    |
| $t_{\text{offset}}$ (s) | 0                      | 0    |
| $M_{\text{eq}}$ (emu)   | $1.019 \times 10^{-4}$ | F    |
| $\tau^*$ (s)            | 131.82                 | F    |

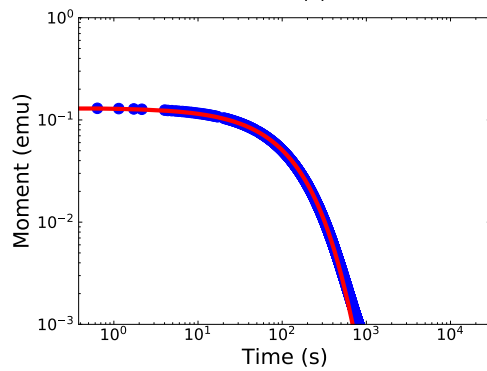

| Parameter               | Fit result             | 23 K |
|-------------------------|------------------------|------|
| $M_0$ (emu)             | 0.133                  | X    |
| $\beta$                 | 0.856                  | F    |
| $t_{\text{offset}}$ (s) | 0                      | 0    |
| $M_{\text{eq}}$ (emu)   | $6.817 \times 10^{-5}$ | F    |
| $\tau^*$ (s)            | 106.26                 | F    |

Figure S69: Full DC decay curves fitted to Eq. 11 with  $M_0$  fixed to first measured point at target field,  $t_{\text{offset}} = 0$  and all other parameters fitted freely.



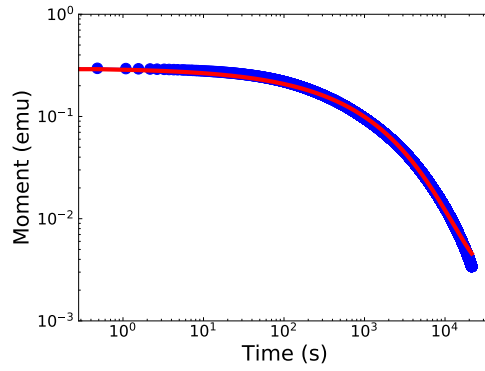

| Parameter               | Fit result              | 2 K |
|-------------------------|-------------------------|-----|
| $M_0$ (emu)             | 0.298                   | X   |
| $\beta$                 | 0.487                   | F   |
| $t_{\text{offset}}$ (s) | $1.517 \times 10^{-26}$ | F   |
| $M_{\text{eq}}$ (emu)   | $2.516 \times 10^{-3}$  | F   |
| $\tau^*$ (s)            | 796.55                  | F   |

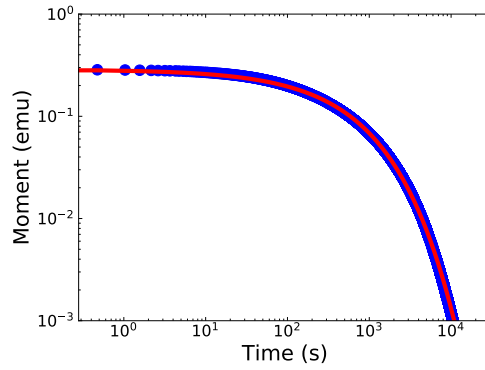

| Parameter               | Fit result              | 4 K |
|-------------------------|-------------------------|-----|
| $M_0$ (emu)             | 0.287                   | X   |
| $\beta$                 | 0.575                   | F   |
| $t_{\text{offset}}$ (s) | $6.378 \times 10^{-21}$ | F   |
| $M_{\text{eq}}$ (emu)   | $6.245 \times 10^{-6}$  | F   |
| $\tau^*$ (s)            | 534.32                  | F   |

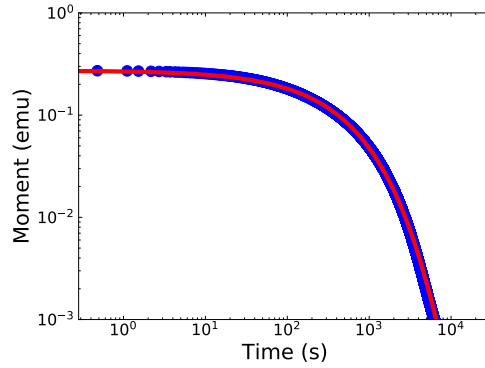

| Parameter               | Fit result              | 6 K |
|-------------------------|-------------------------|-----|
| $M_0$ (emu)             | 0.273                   | X   |
| $\beta$                 | 0.629                   | F   |
| $t_{\text{offset}}$ (s) | $3.192 \times 10^{-22}$ | F   |
| $M_{\text{eq}}$ (emu)   | $1.091 \times 10^{-4}$  | F   |
| $\tau^*$ (s)            | 410.58                  | F   |

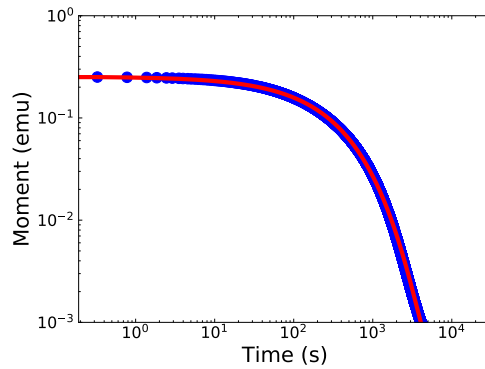

| Parameter               | Fit result              | 9 K |
|-------------------------|-------------------------|-----|
| $M_0$ (emu)             | 0.253                   | X   |
| $\beta$                 | 0.677                   | F   |
| $t_{\text{offset}}$ (s) | $3.213 \times 10^{-19}$ | F   |
| $M_{\text{eq}}$ (emu)   | $2.319 \times 10^{-4}$  | F   |
| $\tau^*$ (s)            | 301.98                  | F   |

Figure S70: Full DC decay curves fitted to Eq. 11 with  $M_0$  fixed to first measured point at target field and all other parameters fitted freely.



| Parameter               | Fit result               | 13 K |
|-------------------------|--------------------------|------|
| $M_0$ (emu)             | 0.214                    | X    |
| $\beta$                 | 0.738                    | F    |
| $t_{\text{offset}}$ (s) | $8.3454 \times 10^{-24}$ | F    |
| $M_{\text{eq}}$ (emu)   | $2.248 \times 10^{-4}$   | F    |
| $\tau^*$ (s)            | 221.43                   | F    |



| Parameter               | Fit result              | 16 K |
|-------------------------|-------------------------|------|
| $M_0$ (emu)             | 0.187                   | X    |
| $\beta$                 | 0.778                   | F    |
| $t_{\text{offset}}$ (s) | $4.094 \times 10^{-25}$ | F    |
| $M_{\text{eq}}$ (emu)   | $1.686 \times 10^{-4}$  | F    |
| $\tau^*$ (s)            | 176.85                  | F    |

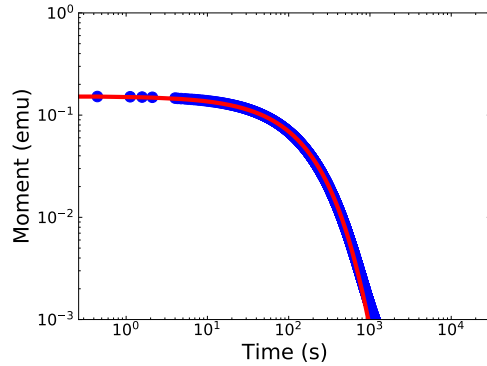

| Parameter               | Fit result              | 20 K |
|-------------------------|-------------------------|------|
| $M_0$ (emu)             | 0.153                   | X    |
| $\beta$                 | 0.826                   | F    |
| $t_{\text{offset}}$ (s) | $1.885 \times 10^{-22}$ | F    |
| $M_{\text{eq}}$ (emu)   | $1.019 \times 10^{-4}$  | F    |
| $\tau^*$ (s)            | 131.82                  | F    |

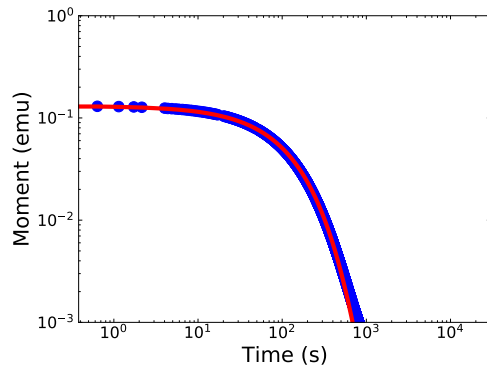

| Parameter               | Fit result              | 9 K |
|-------------------------|-------------------------|-----|
| $M_0$ (emu)             | 0.131                   | X   |
| $\beta$                 | 0.856                   | F   |
| $t_{\text{offset}}$ (s) | $3.483 \times 10^{-19}$ | F   |
| $M_{\text{eq}}$ (emu)   | $6.817 \times 10^{-5}$  | F   |
| $\tau^*$ (s)            | 106.26                  | F   |

Figure S71: Full DC decay curves fitted to Eq. 11 with  $M_0$  fixed to first measured point at target field and all other parameters fitted freely.

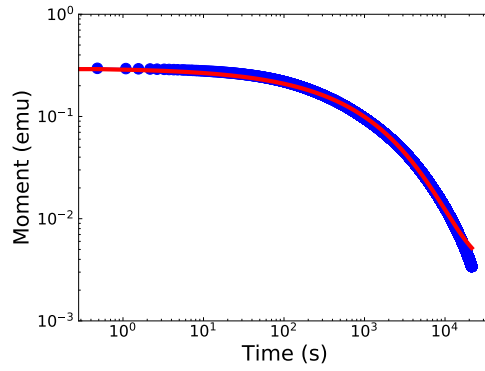

| Parameter               | Fit result              | 2 K |
|-------------------------|-------------------------|-----|
| $M_0$ (emu)             | 0.298                   | X   |
| $\beta$                 | 0.494                   | F   |
| $t_{\text{offset}}$ (s) | $2.137 \times 10^{-19}$ | F   |
| $M_{\text{eq}}$ (emu)   | $3.411 \times 10^{-3}$  | L   |
| $\tau^*$ (s)            | 793.23                  | F   |

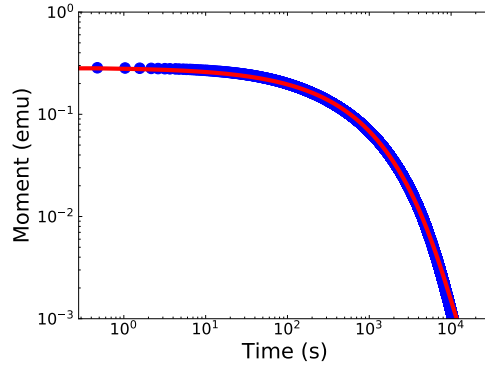

| Parameter               | Fit result              | 4 K |
|-------------------------|-------------------------|-----|
| $M_0$ (emu)             | 0.287                   | X   |
| $\beta$                 | 0.578                   | F   |
| $t_{\text{offset}}$ (s) | $1.084 \times 10^{-19}$ | F   |
| $M_{\text{eq}}$ (emu)   | $2.546 \times 10^{-4}$  | L   |
| $\tau^*$ (s)            | 533.25                  | F   |

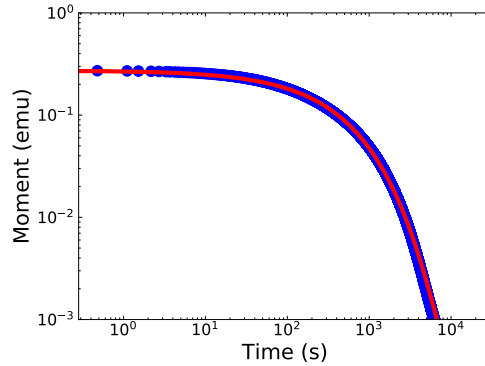

| Parameter               | Fit result              | 6 K |
|-------------------------|-------------------------|-----|
| $M_0$ (emu)             | 0.273                   | X   |
| $\beta$                 | 0.630                   | F   |
| $t_{\text{offset}}$ (s) | $1.567 \times 10^{-22}$ | F   |
| $M_{\text{eq}}$ (emu)   | $1.971 \times 10^{-4}$  | L   |
| $\tau^*$ (s)            | 410.25                  | F   |

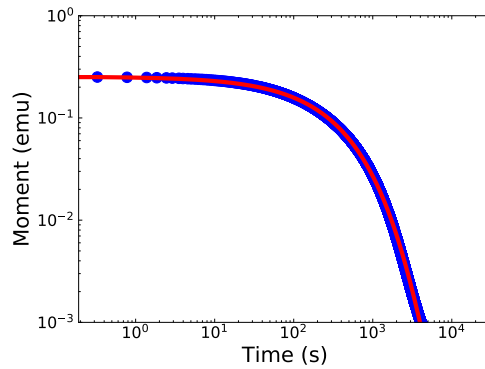

| Parameter               | Fit result              | 9 K |
|-------------------------|-------------------------|-----|
| $M_0$ (emu)             | 0.253                   | X   |
| $\beta$                 | 0.676                   | F   |
| $t_{\text{offset}}$ (s) | $4.043 \times 10^{-21}$ | F   |
| $M_{\text{eq}}$ (emu)   | $1.452 \times 10^{-4}$  | L   |
| $\tau^*$ (s)            | 302.25                  | F   |

Figure S72: Full DC decay curves fitted to Eq. 11 with  $M_0$  fixed to first measured point at target field,  $M_{\text{eq}}$  set to the last measured point and all other parameters fitted freely.

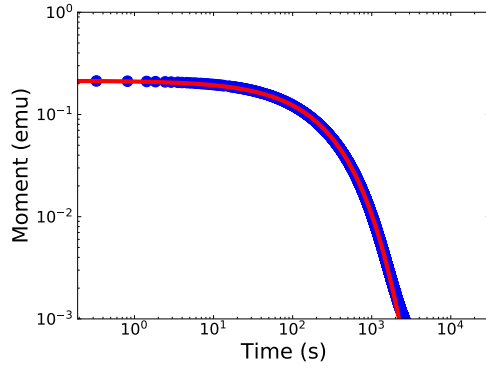

| Parameter               | Fit result              | 13 K |
|-------------------------|-------------------------|------|
| $M_0$ (emu)             | 0.214                   | X    |
| $\beta$                 | 0.736                   | F    |
| $t_{\text{offset}}$ (s) | $1.459 \times 10^{-22}$ | F    |
| $M_{\text{eq}}$ (emu)   | $6.649 \times 10^{-5}$  | L    |
| $\tau^*$ (s)            | 221.84                  | F    |

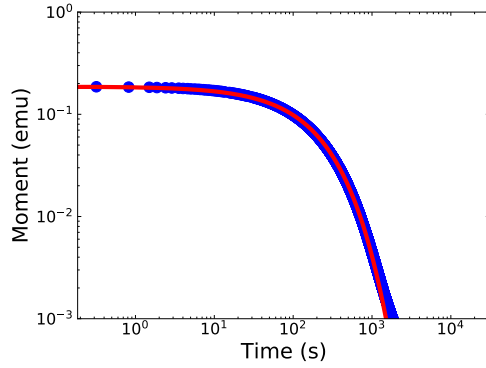

| Parameter               | Fit result              | 16 K |
|-------------------------|-------------------------|------|
| $M_0$ (emu)             | 0.187                   | X    |
| $\beta$                 | 0.776                   | F    |
| $t_{\text{offset}}$ (s) | $1.131 \times 10^{-24}$ | F    |
| $M_{\text{eq}}$ (emu)   | $3.249 \times 10^{-5}$  | L    |
| $\tau^*$ (s)            | 177.18                  | F    |

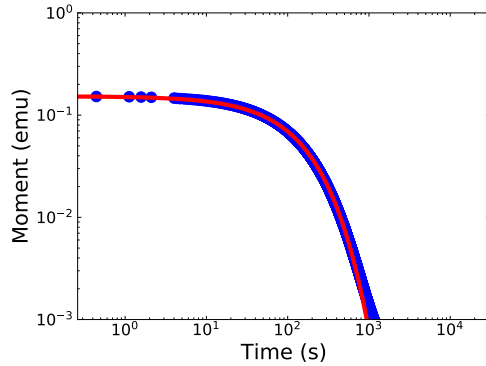

| Parameter               | Fit result              | 20 K |
|-------------------------|-------------------------|------|
| $M_0$ (emu)             | 0.153                   | X    |
| $\beta$                 | 0.825                   | F    |
| $t_{\text{offset}}$ (s) | $3.600 \times 10^{-22}$ | F    |
| $M_{\text{eq}}$ (emu)   | $1.863 \times 10^{-5}$  | L    |
| $\tau^*$ (s)            | 132.01                  | F    |

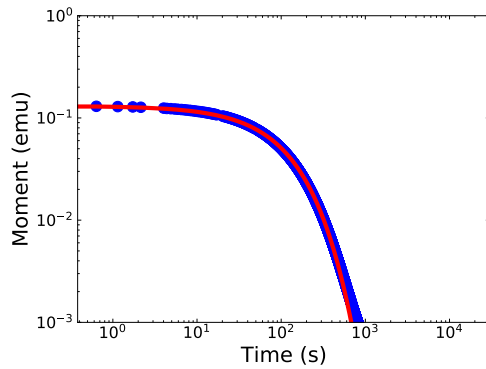

| Parameter               | Fit result              | 23 K |
|-------------------------|-------------------------|------|
| $M_0$ (emu)             | 0.131                   | X    |
| $\beta$                 | 0.855                   | F    |
| $t_{\text{offset}}$ (s) | $3.916 \times 10^{-19}$ | F    |
| $M_{\text{eq}}$ (emu)   | $1.558 \times 10^{-5}$  | L    |
| $\tau^*$ (s)            | 106.36                  | F    |

Figure S73: Full DC decay curves fitted to Eq. 11 with  $M_0$  fixed to first measured point at target field,  $M_{\text{eq}}$  set to the last measured point and all other parameters fitted freely.

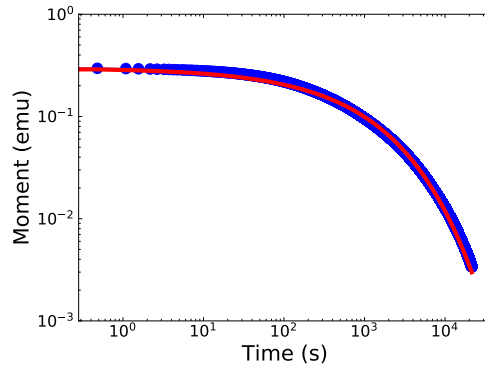

| Parameter               | Fit result              | 2 K |
|-------------------------|-------------------------|-----|
| $M_0$ (emu)             | 0.298                   | X   |
| $\beta$                 | 0.466                   | F   |
| $t_{\text{offset}}$ (s) | $8.376 \times 10^{-23}$ | F   |
| $M_{\text{eq}}$ (emu)   | 0                       | 0   |
| $\tau^*$ (s)            | 814.26                  | F   |

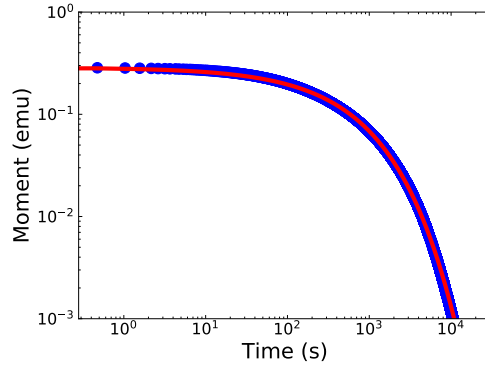

| Parameter               | Fit result              | 4 K |
|-------------------------|-------------------------|-----|
| $M_0$ (emu)             | 0.287                   | X   |
| $\beta$                 | 0.575                   | F   |
| $t_{\text{offset}}$ (s) | $1.854 \times 10^{-20}$ | F   |
| $M_{\text{eq}}$ (emu)   | 0                       | 0   |
| $\tau^*$ (s)            | 534.35                  | F   |

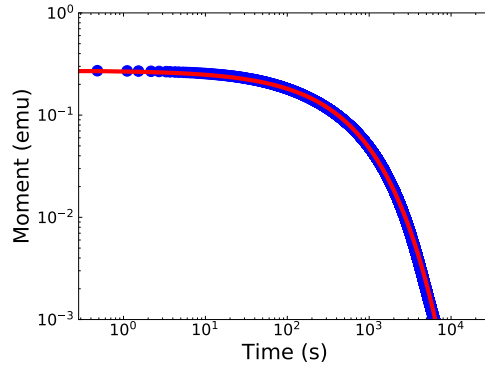

| Parameter               | Fit result              | 6 K |
|-------------------------|-------------------------|-----|
| $M_0$ (emu)             | 0.273                   | X   |
| $\beta$                 | 0.628                   | F   |
| $t_{\text{offset}}$ (s) | $2.206 \times 10^{-22}$ | F   |
| $M_{\text{eq}}$ (emu)   | 0                       | 0   |
| $\tau^*$ (s)            | 410.98                  | F   |

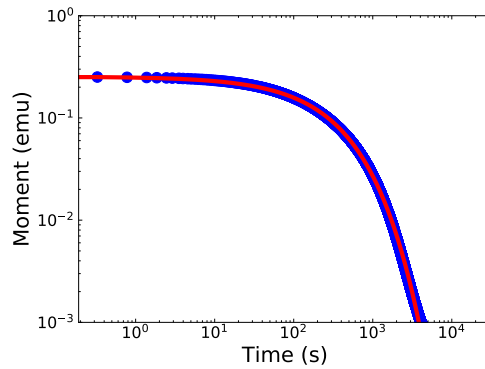

| Parameter               | Fit result              | 9 K |
|-------------------------|-------------------------|-----|
| $M_0$ (emu)             | 0.253                   | X   |
| $\beta$                 | 0.674                   | F   |
| $t_{\text{offset}}$ (s) | $3.774 \times 10^{-19}$ | F   |
| $M_{\text{eq}}$ (emu)   | 0                       | 0   |
| $\tau^*$ (s)            | 302.69                  | F   |

Figure S74: Full DC decay curves fitted to Eq. 11 with  $M_0$  fixed to first measured point at target field,  $M_{\text{eq}}$  set to the target magnetisation and all other parameters fitted freely.

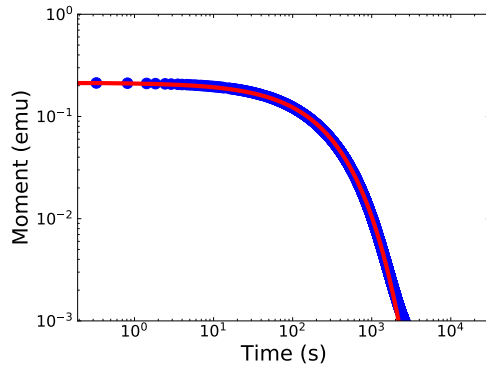

| Parameter               | Fit result              | 13 K |
|-------------------------|-------------------------|------|
| $M_0$ (emu)             | 0.214                   | X    |
| $\beta$                 | 0.734                   | F    |
| $t_{\text{offset}}$ (s) | $3.241 \times 10^{-22}$ | F    |
| $M_{\text{eq}}$ (emu)   | 0                       | 0    |
| $\tau^*$ (s)            | 222.02                  | F    |

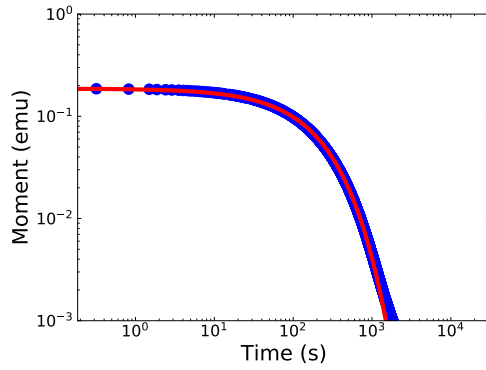

| Parameter               | Fit result              | 16 K |
|-------------------------|-------------------------|------|
| $M_0$ (emu)             | 0.187                   | X    |
| $\beta$                 | 0.775                   | F    |
| $t_{\text{offset}}$ (s) | $1.542 \times 10^{-24}$ | F    |
| $M_{\text{eq}}$ (emu)   | 0                       | 0    |
| $\tau^*$ (s)            | 177.25                  | F    |

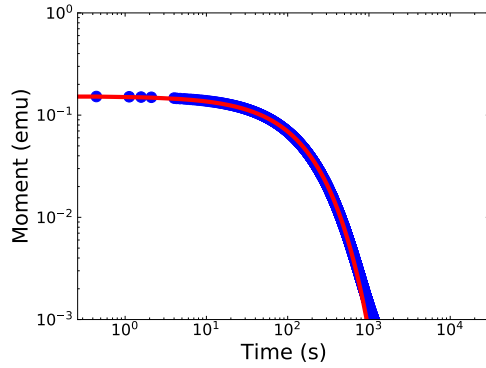

| Parameter               | Fit result              | 20 K |
|-------------------------|-------------------------|------|
| $M_0$ (emu)             | 0.153                   | X    |
| $\beta$                 | 0.824                   | F    |
| $t_{\text{offset}}$ (s) | $4.283 \times 10^{-22}$ | F    |
| $M_{\text{eq}}$ (emu)   | 0                       | 0    |
| $\tau^*$ (s)            | 132.05                  | F    |

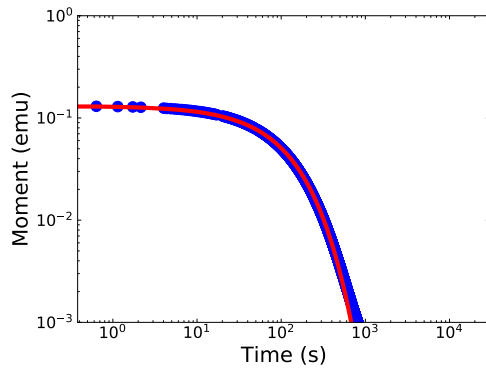

| Parameter               | Fit result              | 23 K |
|-------------------------|-------------------------|------|
| $M_0$ (emu)             | 0.131                   | X    |
| $\beta$                 | 0.855                   | F    |
| $t_{\text{offset}}$ (s) | $4.250 \times 10^{-19}$ | F    |
| $M_{\text{eq}}$ (emu)   | 0                       | 0    |
| $\tau^*$ (s)            | 106.40                  | F    |

Figure S75: Full DC decay curves fitted to Eq. 11 with  $M_0$  fixed to first measured point at target field,  $M_{\text{eq}}$  set to the target magnetisation and all other parameters fitted freely.

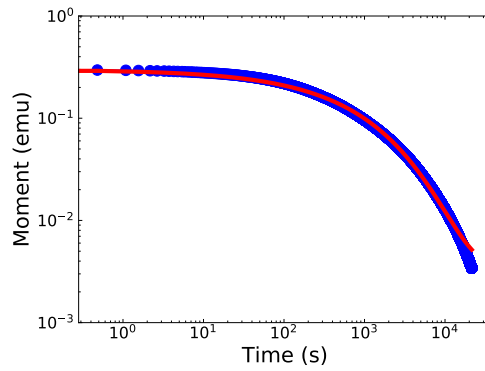

| Parameter               | Fit result             | 2 K |
|-------------------------|------------------------|-----|
| $M_0$ (emu)             | 0.298                  | X   |
| $\beta$                 | 0.494                  | F   |
| $t_{\text{offset}}$ (s) | 0                      | 0   |
| $M_{\text{eq}}$ (emu)   | $3.411 \times 10^{-3}$ | L   |
| $\tau^*$ (s)            | 790.28                 | F   |

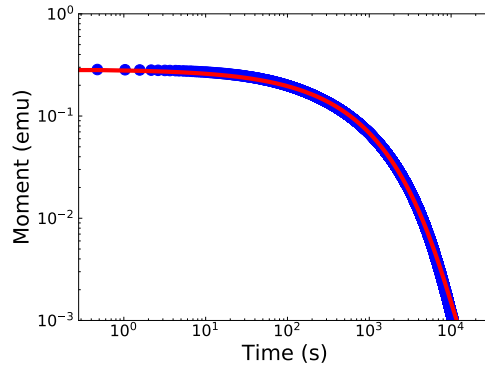

| Parameter               | Fit result             | 4 K |
|-------------------------|------------------------|-----|
| $M_0$ (emu)             | 0.287                  | X   |
| $\beta$                 | 0.578                  | F   |
| $t_{\text{offset}}$ (s) | 0                      | 0   |
| $M_{\text{eq}}$ (emu)   | $2.546 \times 10^{-4}$ | L   |
| $\tau^*$ (s)            | 533.25                 | F   |

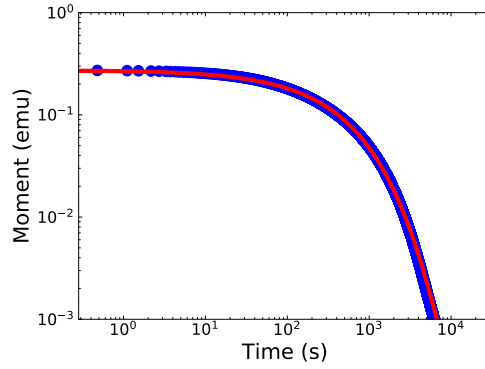

| Parameter               | Fit result             | 6 K |
|-------------------------|------------------------|-----|
| $M_0$ (emu)             | 0.273                  | X   |
| $\beta$                 | 0.630                  | F   |
| $t_{\text{offset}}$ (s) | 0                      | 0   |
| $M_{\text{eq}}$ (emu)   | $1.971 \times 10^{-4}$ | L   |
| $\tau^*$ (s)            | 410.25                 | F   |

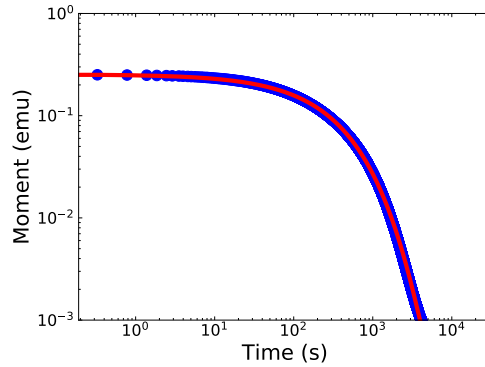

| Parameter               | Fit result             | 9 K |
|-------------------------|------------------------|-----|
| $M_0$ (emu)             | 0.253                  | X   |
| $\beta$                 | 0.676                  | F   |
| $t_{\text{offset}}$ (s) | 0                      | 0   |
| $M_{\text{eq}}$ (emu)   | $1.452 \times 10^{-4}$ | L   |
| $\tau^*$ (s)            | 302.25                 | F   |

Figure S76: Full DC decay curves fitted to Eq. 11 with  $M_0$  fixed to first measured point at target field,  $M_{\text{eq}}$  set to the last measured point,  $t_{\text{offset}} = 0$  and all other parameters fitted freely.

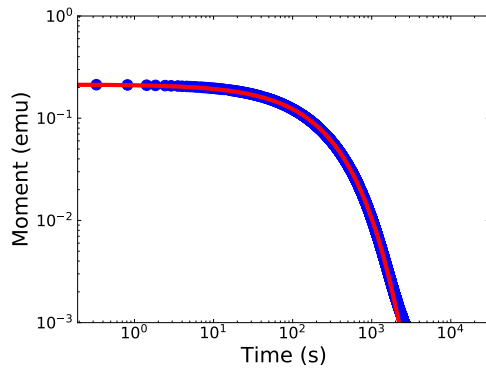

| Parameter               | Fit result             | 13 K |
|-------------------------|------------------------|------|
| $M_0$ (emu)             | 0.214                  | X    |
| $\beta$                 | 0.736                  | F    |
| $t_{\text{offset}}$ (s) | 0                      | 0    |
| $M_{\text{eq}}$ (emu)   | $6.649 \times 10^{-5}$ | L    |
| $\tau^*$ (s)            | 221.84                 | F    |

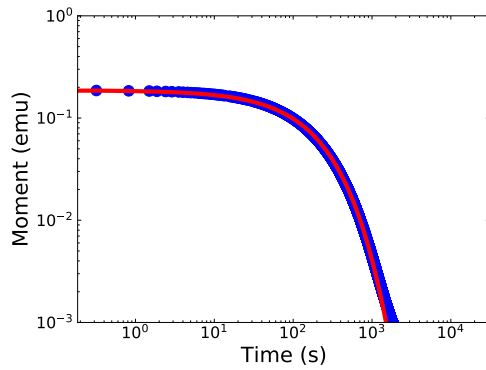

| Parameter               | Fit result             | 16 K |
|-------------------------|------------------------|------|
| $M_0$ (emu)             | 0.187                  | X    |
| $\beta$                 | 0.776                  | F    |
| $t_{\text{offset}}$ (s) | 0                      | 0    |
| $M_{\text{eq}}$ (emu)   | $3.249 \times 10^{-5}$ | L    |
| $\tau^*$ (s)            | 177.18                 | F    |

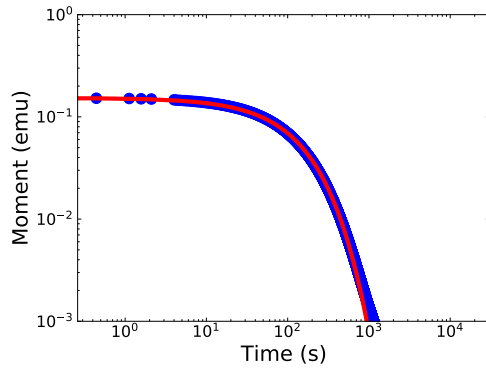

| Parameter               | Fit result             | 20 K |
|-------------------------|------------------------|------|
| $M_0$ (emu)             | 0.153                  | X    |
| $\beta$                 | 0.825                  | F    |
| $t_{\text{offset}}$ (s) | 0                      | 0    |
| $M_{\text{eq}}$ (emu)   | $1.863 \times 10^{-5}$ | L    |
| $\tau^*$ (s)            | 132.01                 | F    |

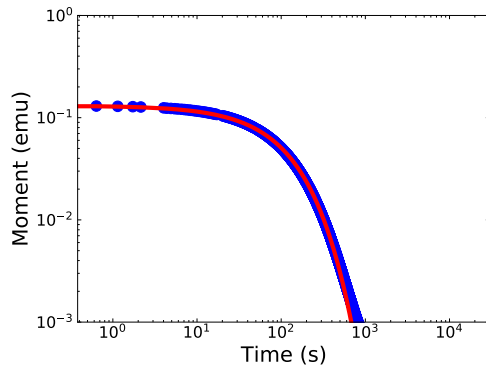

| Parameter               | Fit result             | 23 K |
|-------------------------|------------------------|------|
| $M_0$ (emu)             | 0.131                  | X    |
| $\beta$                 | 0.855                  | F    |
| $t_{\text{offset}}$ (s) | 0                      | 0    |
| $M_{\text{eq}}$ (emu)   | $1.558 \times 10^{-5}$ | L    |
| $\tau^*$ (s)            | 106.36                 | F    |

Figure S77: Full DC decay curves fitted to Eq. 11 with  $M_0$  fixed to first measured point at target field,  $M_{\text{eq}}$  set to the last measured point,  $t_{\text{offset}} = 0$  and all other parameters fitted freely.



## S2.5 DC decays fitting $> 1 \% M_0$

As the data where  $M < 0.01M_0$  does not represent the main relaxation of  $[\text{Dy}(\text{Dtp})_2][\text{Al}\{\text{OC}(\text{CF}_3)_3\}_4]$  then we cut this data out and refit the remaining DC decay trace to Eq. 11. The resultant decay traces were analysed using Eq. 11 with different constraints on the fitted parameters as shown in Table S15 and described in Section 4.3.1. The  $\tau^*$  and  $\beta$  parameters extracted from these fits were used to calculate  $\tau_{\text{mode}}$ ,  $\langle \tau \rangle$  and  $e^{\langle \ln[\tau] \rangle}$ . These four measures of  $\tau$  were then compared to the  $\tau_{\text{debye}}$  extracted from Waveform measurements of  $[\text{Dy}(\text{Dtp})_2][\text{Al}\{\text{OC}(\text{CF}_3)_3\}_4]$  for all ways of fitting Eq. 11 to determine the best method and metric for characterising SMMs using DC decay measurements.

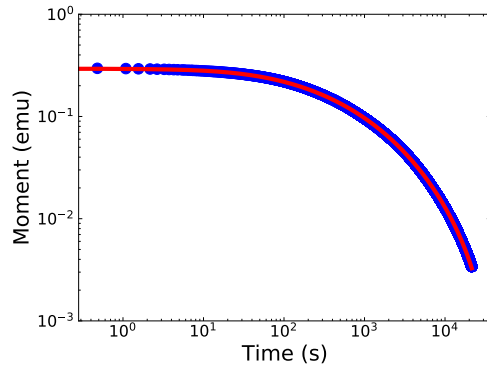

| Parameter               | Fit result              | 2 K |
|-------------------------|-------------------------|-----|
| $M_0$ (emu)             | 0.491                   | F   |
| $\beta$                 | 0.342                   | F   |
| $t_{\text{offset}}$ (s) | 36.19                   | F   |
| $M_{\text{eq}}$ (emu)   | $-1.966 \times 10^{-3}$ | F   |
| $\tau^*$ (s)            | 256.62                  | F   |

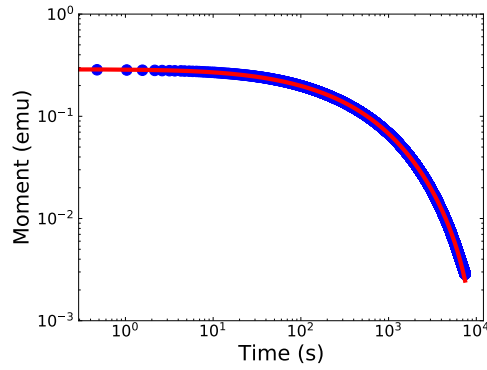

| Parameter               | Fit result              | 4 K |
|-------------------------|-------------------------|-----|
| $M_0$ (emu)             | 0.333                   | F   |
| $\beta$                 | 0.502                   | F   |
| $t_{\text{offset}}$ (s) | 8.38                    | F   |
| $M_{\text{eq}}$ (emu)   | $-2.181 \times 10^{-3}$ | F   |
| $\tau^*$ (s)            | 411.11                  | F   |

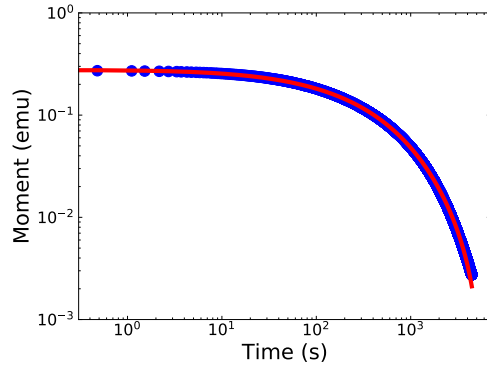

| Parameter               | Fit result              | 6 K |
|-------------------------|-------------------------|-----|
| $M_0$ (emu)             | 0.299                   | F   |
| $\beta$                 | 0.567                   | F   |
| $t_{\text{offset}}$ (s) | 4.01                    | F   |
| $M_{\text{eq}}$ (emu)   | $-2.678 \times 10^{-3}$ | F   |
| $\tau^*$ (s)            | 361.95                  | F   |

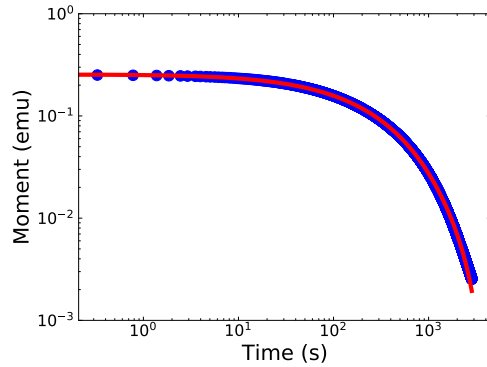

| Parameter               | Fit result              | 9 K |
|-------------------------|-------------------------|-----|
| $M_0$ (emu)             | 0.268                   | F   |
| $\beta$                 | 0.633                   | F   |
| $t_{\text{offset}}$ (s) | 2.60                    | F   |
| $M_{\text{eq}}$ (emu)   | $-1.673 \times 10^{-3}$ | F   |
| $\tau^*$ (s)            | 283.35                  | F   |

Figure S78: DC decay curves fitted for  $M > 0.01 M_0$  to Eq. 11 with all parameters fitted freely.

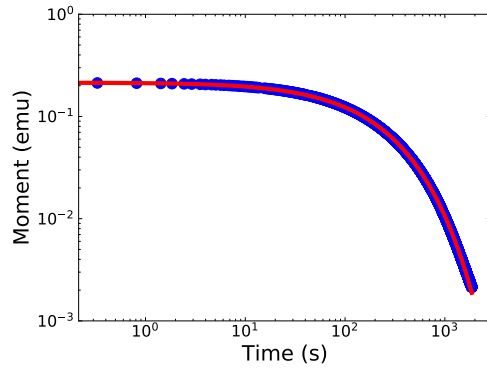

| Parameter               | Fit result              | 13 K |
|-------------------------|-------------------------|------|
| $M_0$ (emu)             | 0.228                   | F    |
| $\beta$                 | 0.705                   | F    |
| $t_{\text{offset}}$ (s) | 4.08                    | F    |
| $M_{\text{eq}}$ (emu)   | $-1.300 \times 10^{-4}$ | F    |
| $\tau^*$ (s)            | 205.86                  | F    |

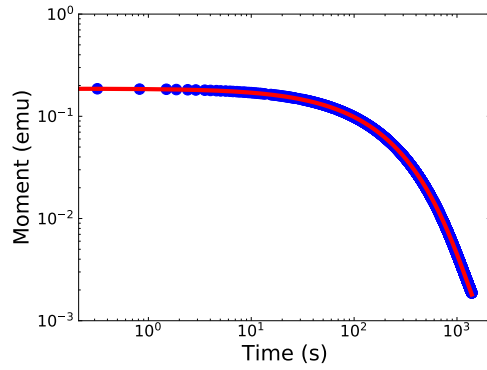

| Parameter               | Fit result             | 16 K |
|-------------------------|------------------------|------|
| $M_0$ (emu)             | 0.205                  | F    |
| $\beta$                 | 0.748                  | F    |
| $t_{\text{offset}}$ (s) | 6.79                   | F    |
| $M_{\text{eq}}$ (emu)   | $4.655 \times 10^{-4}$ | F    |
| $\tau^*$ (s)            | 161.34                 | F    |

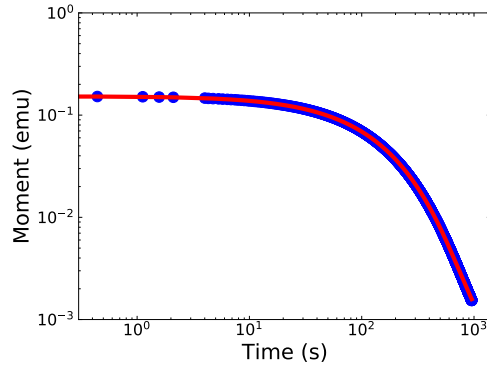

| Parameter               | Fit result             | 20 K |
|-------------------------|------------------------|------|
| $M_0$ (emu)             | 0.175                  | F    |
| $\beta$                 | 0.798                  | F    |
| $t_{\text{offset}}$ (s) | 10.03                  | F    |
| $M_{\text{eq}}$ (emu)   | $7.259 \times 10^{-4}$ | F    |
| $\tau^*$ (s)            | 118.91                 | F    |

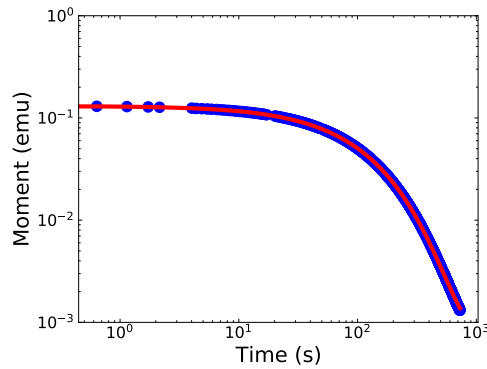

| Parameter               | Fit result             | 23 K |
|-------------------------|------------------------|------|
| $M_0$ (emu)             | 0.155                  | F    |
| $\beta$                 | 0.830                  | F    |
| $t_{\text{offset}}$ (s) | 11.46                  | F    |
| $M_{\text{eq}}$ (emu)   | $7.149 \times 10^{-4}$ | F    |
| $\tau^*$ (s)            | 95.87                  | F    |

Figure S79: DC decay curves fitted for  $M > 0.01 M_0$  to Eq. 11 with all parameters fitted freely.



| Parameter               | Fit result | 2 K |
|-------------------------|------------|-----|
| $M_0$ (emu)             | 0.404      | F   |
| $\beta$                 | 0.387      | F   |
| $t_{\text{offset}}$ (s) | 18.93      | F   |
| $M_{\text{eq}}$ (emu)   | 0          | 0   |
| $\tau^*$ (s)            | 405.63     | F   |

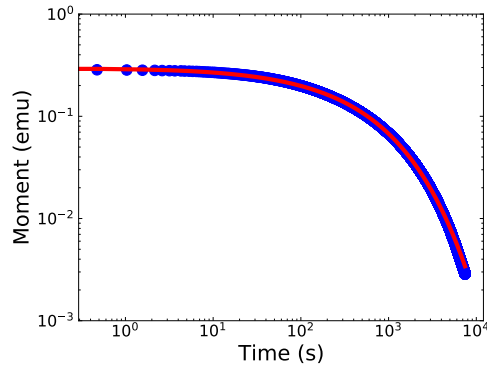

| Parameter               | Fit result | 4 K |
|-------------------------|------------|-----|
| $M_0$ (emu)             | 0.307      | F   |
| $\beta$                 | 0.544      | F   |
| $t_{\text{offset}}$ (s) | 1.55       | F   |
| $M_{\text{eq}}$ (emu)   | 0          | 0   |
| $\tau^*$ (s)            | 467.94     | F   |

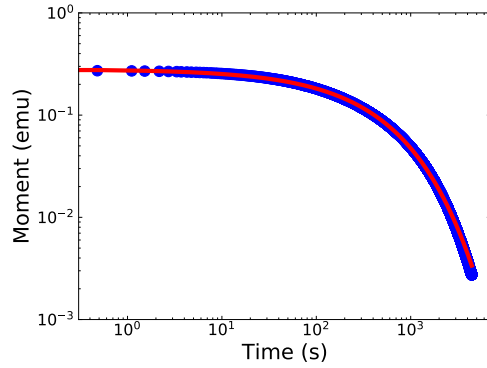

| Parameter               | Fit result            | 6 K |
|-------------------------|-----------------------|-----|
| $M_0$ (emu)             | 0.281                 | F   |
| $\beta$                 | 0.612                 | F   |
| $t_{\text{offset}}$ (s) | $7.73 \times 10^{-2}$ | F   |
| $M_{\text{eq}}$ (emu)   | 0                     | 0   |
| $\tau^*$ (s)            | 390.25                | F   |

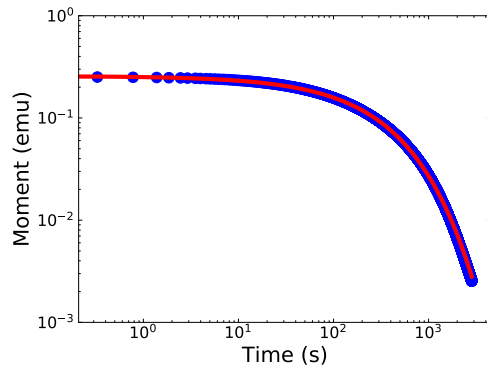

| Parameter               | Fit result            | 9 K |
|-------------------------|-----------------------|-----|
| $M_0$ (emu)             | 0.257                 | F   |
| $\beta$                 | 0.665                 | F   |
| $t_{\text{offset}}$ (s) | $5.70 \times 10^{-2}$ | F   |
| $M_{\text{eq}}$ (emu)   | 0                     | 0   |
| $\tau^*$ (s)            | 295.12                | F   |

Figure S80: DC decay curves fitted for  $M > 0.01 M_0$  to Eq. 11 with  $M_{\text{eq}} = 0$  set to target and all other parameters fitted freely.

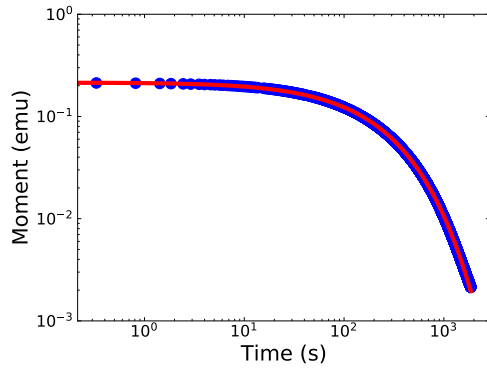

| Parameter               | Fit result | 13 K |
|-------------------------|------------|------|
| $M_0$ (emu)             | 0.226      | F    |
| $\beta$                 | 0.710      | F    |
| $t_{\text{offset}}$ (s) | 3.33       | F    |
| $M_{\text{eq}}$ (emu)   | 0          | 0    |
| $\tau^*$ (s)            | 207.50     | F    |

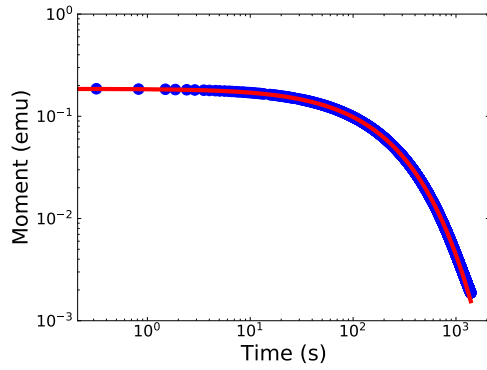

| Parameter               | Fit result | 16 K |
|-------------------------|------------|------|
| $M_0$ (emu)             | 0.222      | F    |
| $\beta$                 | 0.719      | F    |
| $t_{\text{offset}}$ (s) | 13.80      | F    |
| $M_{\text{eq}}$ (emu)   | 0          | 0    |
| $\tau^*$ (s)            | 151.40     | F    |

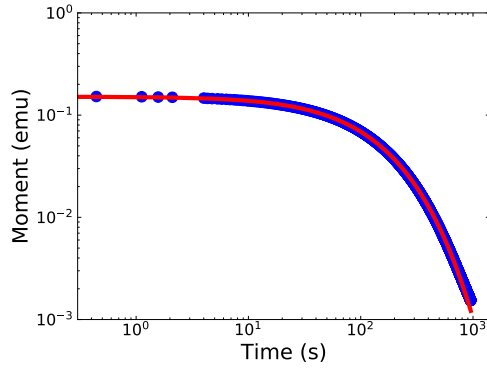

| Parameter               | Fit result | 20 K |
|-------------------------|------------|------|
| $M_0$ (emu)             | 0.275      | F    |
| $\beta$                 | 0.702      | F    |
| $t_{\text{offset}}$ (s) | 42.96      | F    |
| $M_{\text{eq}}$ (emu)   | 0          | 0    |
| $\tau^*$ (s)            | 89.80      | F    |

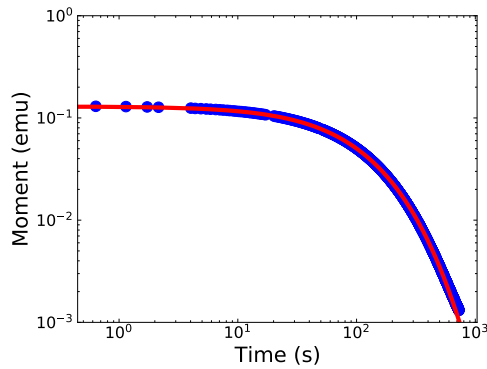

| Parameter               | Fit result | 23 K |
|-------------------------|------------|------|
| $M_0$ (emu)             | 0.484      | F    |
| $\beta$                 | 0.662      | F    |
| $t_{\text{offset}}$ (s) | 78.70      | F    |
| $M_{\text{eq}}$ (emu)   | 0          | 0    |
| $\tau^*$ (s)            | 51.93      | F    |

Figure S81: DC decay curves fitted for  $M > 0.01 M_0$  to Eq. 11 with  $M_{\text{eq}} = 0$  set to target and all other parameters fitted freely.

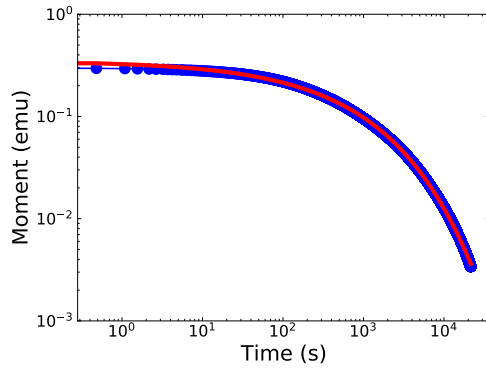

| Parameter               | Fit result | 2 K |
|-------------------------|------------|-----|
| $M_0$ (emu)             | 0.350      | F   |
| $\beta$                 | 0.415      | F   |
| $t_{\text{offset}}$ (s) | 0          | 0   |
| $M_{\text{eq}}$ (emu)   | 0          | 0   |
| $\tau^*$ (s)            | 553.73     | F   |

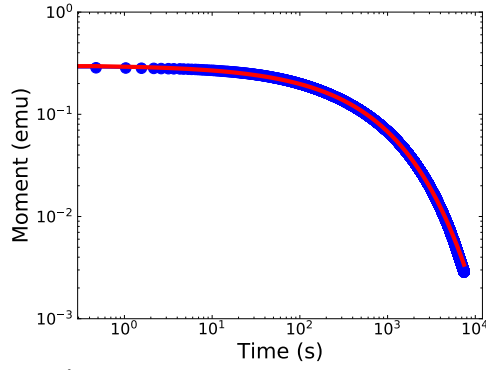

| Parameter               | Fit result | 4 K |
|-------------------------|------------|-----|
| $M_0$ (emu)             | 0.303      | F   |
| $\beta$                 | 0.548      | F   |
| $t_{\text{offset}}$ (s) | 0          | 0   |
| $M_{\text{eq}}$ (emu)   | 0          | 0   |
| $\tau^*$ (s)            | 477.85     | F   |

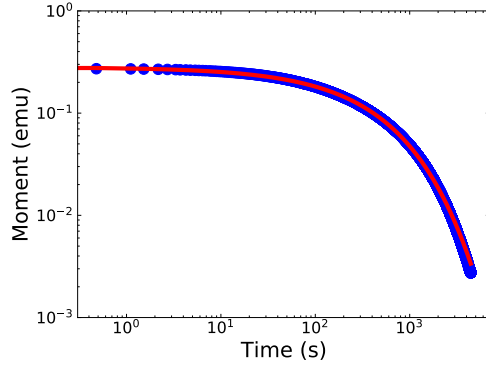

| Parameter               | Fit result | 6 K |
|-------------------------|------------|-----|
| $M_0$ (emu)             | 0.281      | F   |
| $\beta$                 | 0.612      | F   |
| $t_{\text{offset}}$ (s) | 0          | 0   |
| $M_{\text{eq}}$ (emu)   | 0          | 0   |
| $\tau^*$ (s)            | 390.71     | F   |

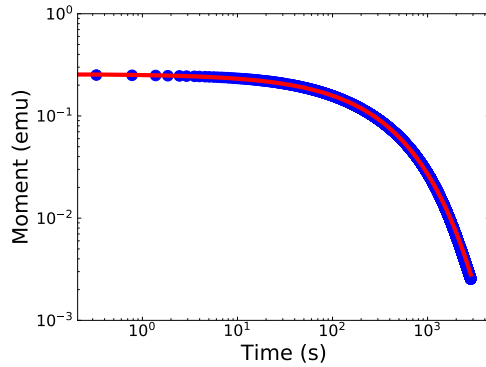

| Parameter               | Fit result | 9 K |
|-------------------------|------------|-----|
| $M_0$ (emu)             | 0.257      | F   |
| $\beta$                 | 0.666      | F   |
| $t_{\text{offset}}$ (s) | 0          | 0   |
| $M_{\text{eq}}$ (emu)   | 0          | 0   |
| $\tau^*$ (s)            | 295.36     | F   |

Figure S82: DC decay curves fitted for  $M > 0.01 M_0$  to Eq. 11 with  $M_{\text{eq}} = 0$  set to target,  $t_{\text{offset}} = 0$  and all other parameters fitted freely.

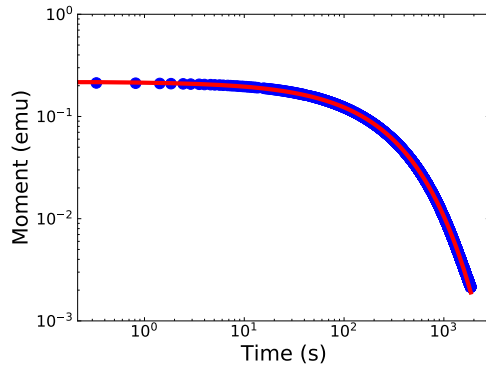

| Parameter               | Fit result | 13 K |
|-------------------------|------------|------|
| $M_0$ (emu)             | 0.219      | F    |
| $\beta$                 | 0.721      | F    |
| $t_{\text{offset}}$ (s) | 0          | 0    |
| $M_{\text{eq}}$ (emu)   | 0          | 0    |
| $\tau^*$ (s)            | 214.34     | F    |

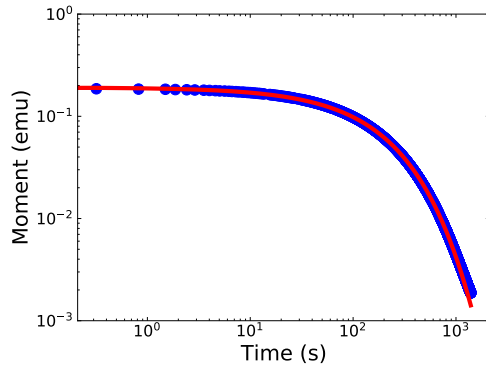

| Parameter               | Fit result | 16 K |
|-------------------------|------------|------|
| $M_0$ (emu)             | 0.191      | F    |
| $\beta$                 | 0.757      | F    |
| $t_{\text{offset}}$ (s) | 0          | 0    |
| $M_{\text{eq}}$ (emu)   | 0          | 0    |
| $\tau^*$ (s)            | 170.46     | F    |

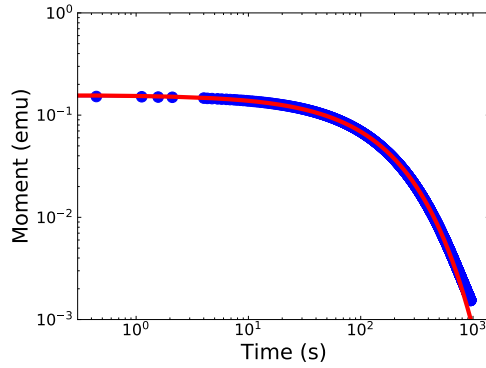

| Parameter               | Fit result | 20 K |
|-------------------------|------------|------|
| $M_0$ (emu)             | 0.157      | F    |
| $\beta$                 | 0.804      | F    |
| $t_{\text{offset}}$ (s) | 0          | 0    |
| $M_{\text{eq}}$ (emu)   | 0          | 0    |
| $\tau^*$ (s)            | 127.06     | F    |

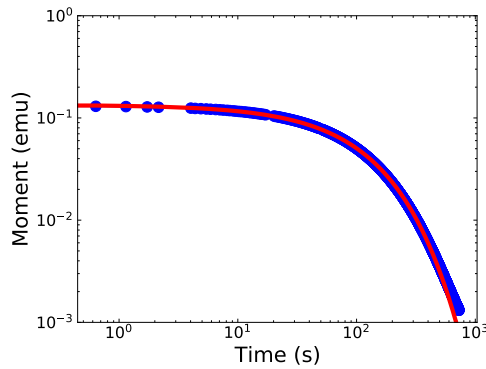

| Parameter               | Fit result | 23 K |
|-------------------------|------------|------|
| $M_0$ (emu)             | 0.134      | F    |
| $\beta$                 | 0.834      | F    |
| $t_{\text{offset}}$ (s) | 0          | 0    |
| $M_{\text{eq}}$ (emu)   | 0          | 0    |
| $\tau^*$ (s)            | 102.73     | F    |

Figure S83: DC decay curves fitted for  $M > 0.01 M_0$  to Eq. 11 with  $M_{\text{eq}} = 0$  set to target,  $t_{\text{offset}} = 0$  and all other parameters fitted freely.



| Parameter               | Fit result             | 2 K |
|-------------------------|------------------------|-----|
| $M_0$ (emu)             | 0.347                  | F   |
| $\beta$                 | 0.421                  | F   |
| $t_{\text{offset}}$ (s) | 0                      | 0   |
| $M_{\text{eq}}$ (emu)   | $4.304 \times 10^{-4}$ | F   |
| $\tau^*$ (s)            | 565.29                 | F   |

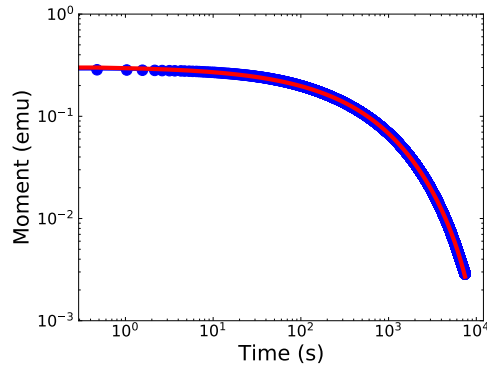

| Parameter               | Fit result              | 4 K |
|-------------------------|-------------------------|-----|
| $M_0$ (emu)             | 0.308                   | F   |
| $\beta$                 | 0.531                   | F   |
| $t_{\text{offset}}$ (s) | 0                       | 0   |
| $M_{\text{eq}}$ (emu)   | $-1.309 \times 10^{-3}$ | F   |
| $\tau^*$ (s)            | 467061                  | F   |

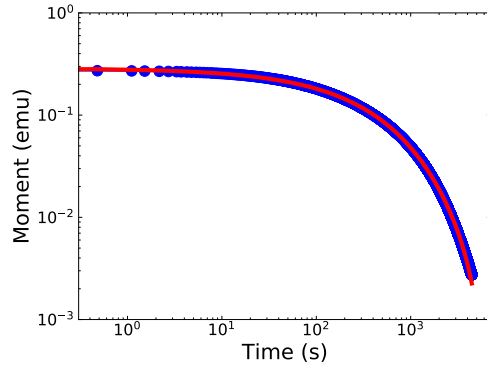

| Parameter               | Fit result              | 6 K |
|-------------------------|-------------------------|-----|
| $M_0$ (emu)             | 0.287                   | F   |
| $\beta$                 | 0.584                   | F   |
| $t_{\text{offset}}$ (s) | 0                       | 0   |
| $M_{\text{eq}}$ (emu)   | $-2.154 \times 10^{-3}$ | F   |
| $\tau^*$ (s)            | 383.15                  | F   |

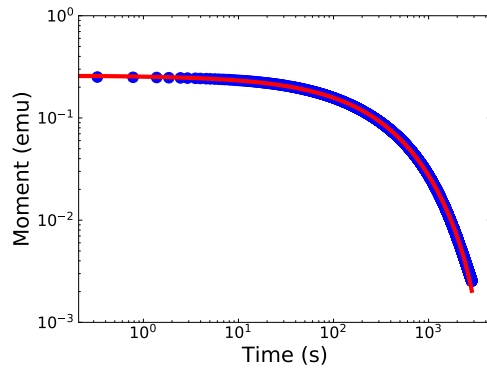

| Parameter               | Fit result              | 9 K |
|-------------------------|-------------------------|-----|
| $M_0$ (emu)             | 0.347                   | F   |
| $\beta$                 | 0.421                   | F   |
| $t_{\text{offset}}$ (s) | 0                       | 0   |
| $M_{\text{eq}}$ (emu)   | $-1.365 \times 10^{-3}$ | F   |
| $\tau^*$ (s)            | 292.98                  | F   |

Figure S84: DC decay curves fitted for  $M > 0.01 M_0$  to Eq. 11 with  $t_{\text{offset}} = 0$  and all other parameters fitted freely.



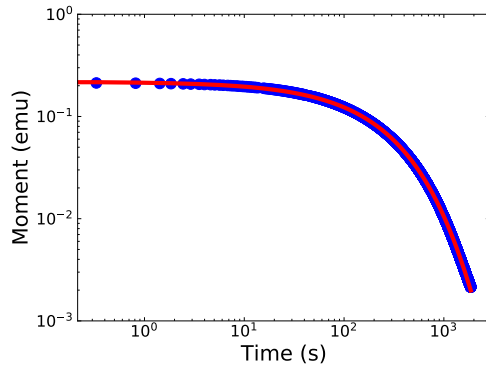

| Parameter               | Fit result             | 13 K |
|-------------------------|------------------------|------|
| $M_0$ (emu)             | 0.218                  | F    |
| $\beta$                 | 0.723                  | F    |
| $t_{\text{offset}}$ (s) | 0                      | 0    |
| $M_{\text{eq}}$ (emu)   | $1.324 \times 10^{-4}$ | F    |
| $\tau^*$ (s)            | 214.47                 | F    |

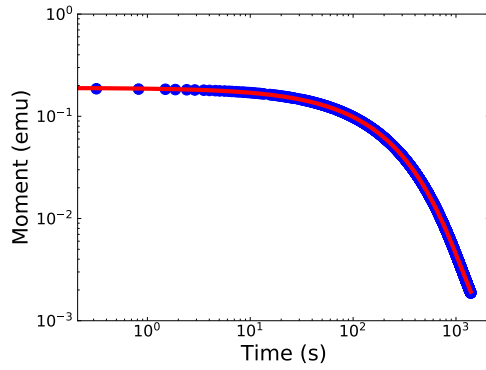

| Parameter               | Fit result             | 16 K |
|-------------------------|------------------------|------|
| $M_0$ (emu)             | 0.190                  | F    |
| $\beta$                 | 0.774                  | F    |
| $t_{\text{offset}}$ (s) | 0                      | 0    |
| $M_{\text{eq}}$ (emu)   | $7.358 \times 10^{-4}$ | F    |
| $\tau^*$ (s)            | 170.91                 | F    |

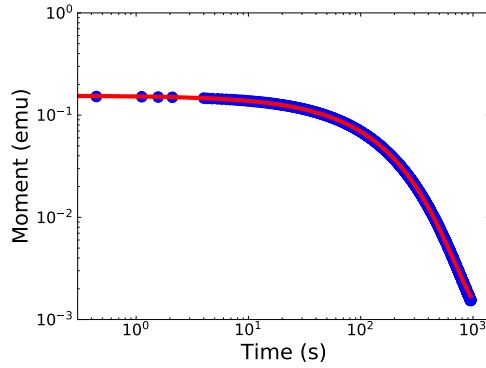

| Parameter               | Fit result             | 20 K |
|-------------------------|------------------------|------|
| $M_0$ (emu)             | 0.155                  | F    |
| $\beta$                 | 0.831                  | F    |
| $t_{\text{offset}}$ (s) | 0                      | 0    |
| $M_{\text{eq}}$ (emu)   | $9.495 \times 10^{-4}$ | F    |
| $\tau^*$ (s)            | 127.44                 | F    |

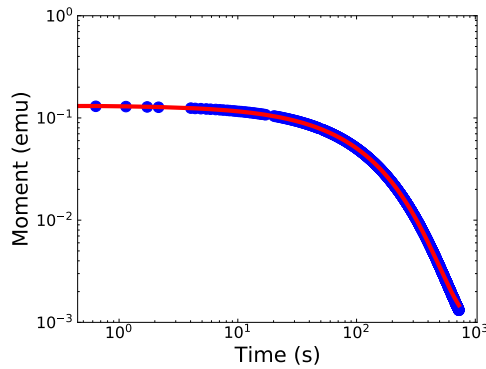

| Parameter               | Fit result             | 23 K |
|-------------------------|------------------------|------|
| $M_0$ (emu)             | 0.132                  | F    |
| $\beta$                 | 0.866                  | F    |
| $t_{\text{offset}}$ (s) | 0                      | 0    |
| $M_{\text{eq}}$ (emu)   | $8.957 \times 10^{-4}$ | F    |
| $\tau^*$ (s)            | 102.94                 | F    |

Figure S85: DC decay curves fitted for  $M > 0.01 M_0$  to Eq. 11 with  $t_{\text{offset}} = 0$  and all other parameters fitted freely.

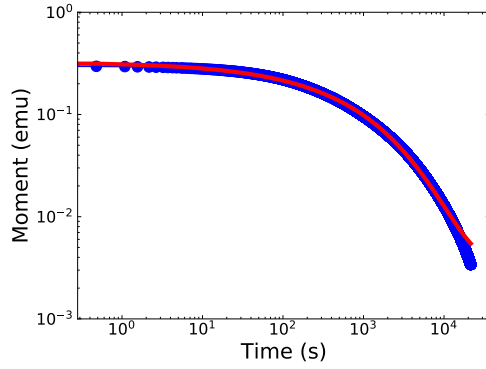

| Parameter               | Fit result             | 2 K |
|-------------------------|------------------------|-----|
| $M_0$ (emu)             | 0.326                  | F   |
| $\beta$                 | 0.462                  | F   |
| $t_{\text{offset}}$ (s) | 0                      | 0   |
| $M_{\text{eq}}$ (emu)   | $3.411 \times 10^{-3}$ | L   |
| $\tau^*$ (s)            | 645.21                 | F   |

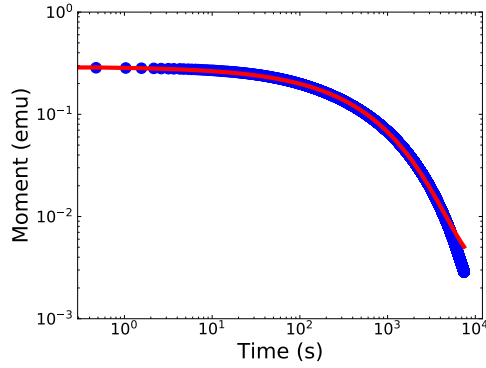

| Parameter               | Fit result             | 4 K |
|-------------------------|------------------------|-----|
| $M_0$ (emu)             | 0.292                  | F   |
| $\beta$                 | 0.587                  | F   |
| $t_{\text{offset}}$ (s) | 0                      | 0   |
| $M_{\text{eq}}$ (emu)   | $2.867 \times 10^{-3}$ | L   |
| $\tau^*$ (s)            | 498.76                 | F   |

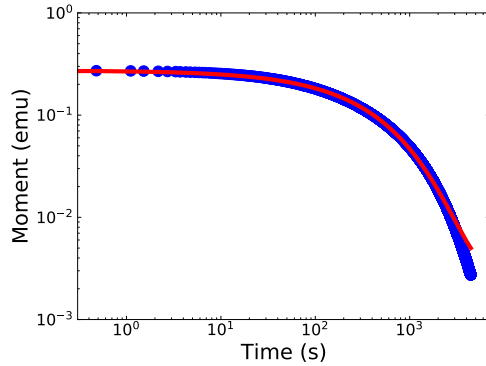

| Parameter               | Fit result             | 4 K |
|-------------------------|------------------------|-----|
| $M_0$ (emu)             | 0.273                  | F   |
| $\beta$                 | 0.650                  | F   |
| $t_{\text{offset}}$ (s) | 0                      | 0   |
| $M_{\text{eq}}$ (emu)   | $2.736 \times 10^{-3}$ | L   |
| $\tau^*$ (s)            | 399.22                 | F   |

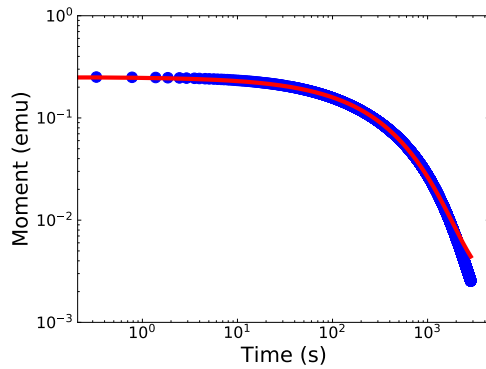

| Parameter               | Fit result             | 9 K |
|-------------------------|------------------------|-----|
| $M_0$ (emu)             | 0.251                  | F   |
| $\beta$                 | 0.704                  | F   |
| $t_{\text{offset}}$ (s) | 0                      | 0   |
| $M_{\text{eq}}$ (emu)   | $2.536 \times 10^{-3}$ | L   |
| $\tau^*$ (s)            | 299.12                 | F   |

Figure S86: DC decay curves fitted for  $M > 0.01 M_0$  to Eq. 11 with  $t_{\text{offset}} = 0$ ,  $M_{\text{eq}}$  set to the last measured values and all other parameters fitted freely.

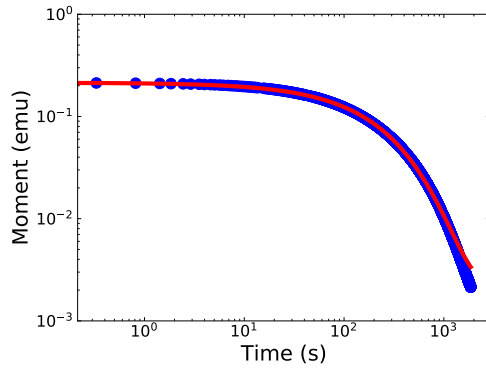

| Parameter               | Fit result             | 13 K |
|-------------------------|------------------------|------|
| $M_0$ (emu)             | 0.214                  | F    |
| $\beta$                 | 0.761                  | F    |
| $t_{\text{offset}}$ (s) | 0                      | 0    |
| $M_{\text{eq}}$ (emu)   | $2.141 \times 10^{-3}$ | L    |
| $\tau^*$ (s)            | 216.10                 | F    |

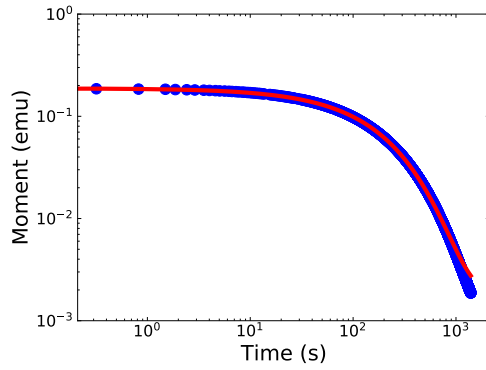

| Parameter               | Fit result             | 16 K |
|-------------------------|------------------------|------|
| $M_0$ (emu)             | 0.188                  | F    |
| $\beta$                 | 0.800                  | F    |
| $t_{\text{offset}}$ (s) | 0                      | 0    |
| $M_{\text{eq}}$ (emu)   | $1.869 \times 10^{-3}$ | L    |
| $\tau^*$ (s)            | 171.42                 | F    |

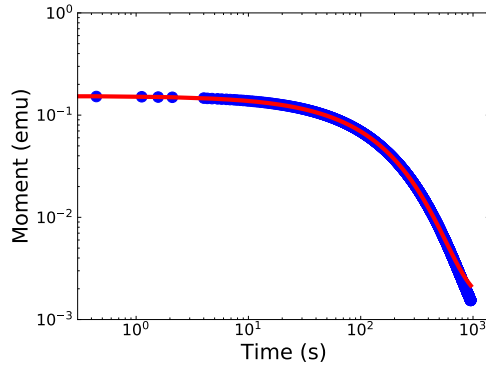

| Parameter               | Fit result             | 20 K |
|-------------------------|------------------------|------|
| $M_0$ (emu)             | 0.154                  | F    |
| $\beta$                 | 0.849                  | F    |
| $t_{\text{offset}}$ (s) | 0                      | 0    |
| $M_{\text{eq}}$ (emu)   | $1.540 \times 10^{-3}$ | L    |
| $\tau^*$ (s)            | 127.60                 | F    |

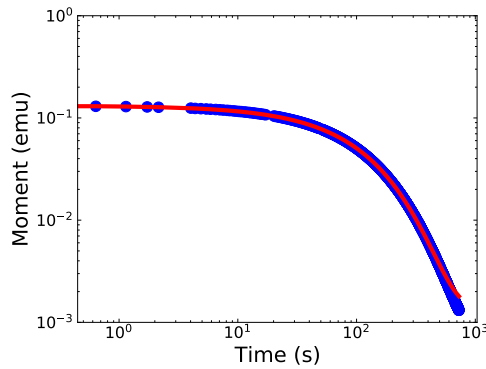

| Parameter               | Fit result             | 23 K |
|-------------------------|------------------------|------|
| $M_0$ (emu)             | 0.132                  | F    |
| $\beta$                 | 0.880                  | F    |
| $t_{\text{offset}}$ (s) | 0                      | 0    |
| $M_{\text{eq}}$ (emu)   | $1.314 \times 10^{-3}$ | L    |
| $\tau^*$ (s)            | 102.99                 | F    |

Figure S87: DC decay curves fitted for  $M > 0.01 M_0$  to Eq. 11 with  $t_{\text{offset}} = 0$ ,  $M_{\text{eq}}$  set to the last measured values and all other parameters fitted freely.

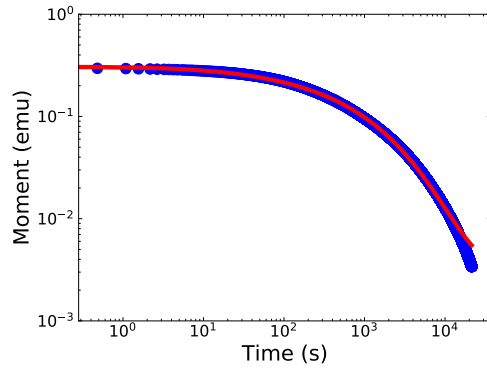

| Parameter               | Fit result              | 2 K |
|-------------------------|-------------------------|-----|
| $M_0$ (emu)             | 0.331                   | F   |
| $\beta$                 | 0.458                   | F   |
| $t_{\text{offset}}$ (s) | 2.24                    | F   |
| $M_{\text{eq}}$ (emu)   | $3.4114 \times 10^{-3}$ | L   |
| $\tau^*$ (s)            | 623.59                  | F   |

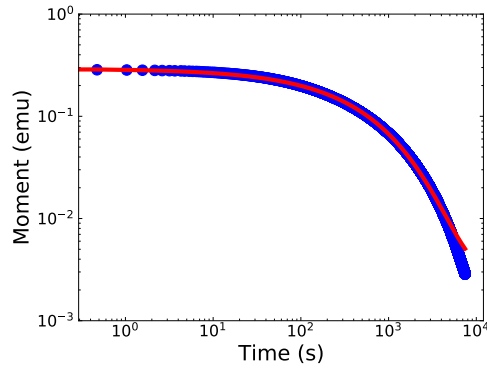

| Parameter               | Fit result             | 4 K |
|-------------------------|------------------------|-----|
| $M_0$ (emu)             | 0.292                  | F   |
| $\beta$                 | 0.587                  | F   |
| $t_{\text{offset}}$ (s) | $4.47 \times 10^{-3}$  | F   |
| $M_{\text{eq}}$ (emu)   | $2.867 \times 10^{-3}$ | L   |
| $\tau^*$ (s)            | 498.70                 | F   |

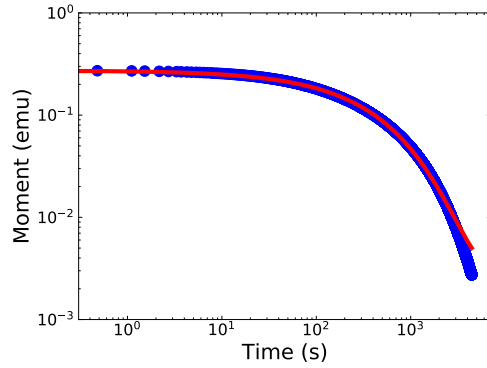

| Parameter               | Fit result             | 6 K |
|-------------------------|------------------------|-----|
| $M_0$ (emu)             | 0.273                  | F   |
| $\beta$                 | 0.650                  | F   |
| $t_{\text{offset}}$ (s) | $8.10 \times 10^{-14}$ | F   |
| $M_{\text{eq}}$ (emu)   | $2.736 \times 10^{-3}$ | L   |
| $\tau^*$ (s)            | 399.22                 | F   |

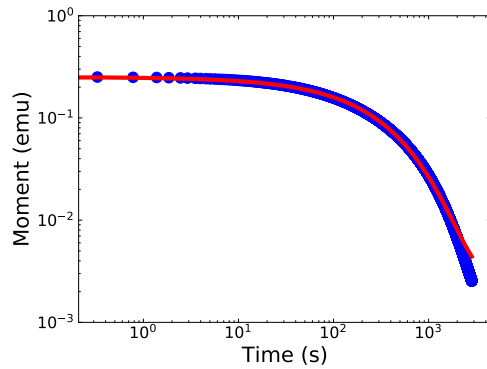

| Parameter               | Fit result             | 9 K |
|-------------------------|------------------------|-----|
| $M_0$ (emu)             | 0.251                  | F   |
| $\beta$                 | 0.704                  | F   |
| $t_{\text{offset}}$ (s) | $1.25 \times 10^{-17}$ | F   |
| $M_{\text{eq}}$ (emu)   | $2.536 \times 10^{-3}$ | L   |
| $\tau^*$ (s)            | 299.12                 | F   |

Figure S88: DC decay curves fitted for  $M > 0.01 M_0$  to Eq. 11 with  $M_{\text{eq}}$  set to the last measured point and all other parameters fitted freely.

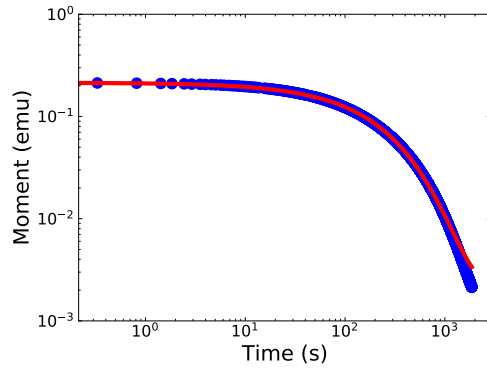

| Parameter               | Fit result             | 13 K |
|-------------------------|------------------------|------|
| $M_0$ (emu)             | 0.214                  | F    |
| $\beta$                 | 0.761                  | F    |
| $t_{\text{offset}}$ (s) | $9.50 \times 10^{-14}$ | F    |
| $M_{\text{eq}}$ (emu)   | $2.141 \times 10^{-3}$ | L    |
| $\tau^*$ (s)            | 216.10                 | F    |

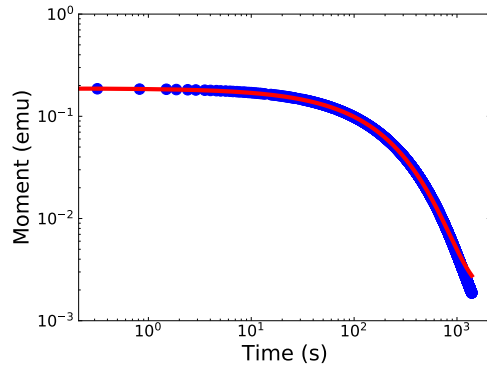

| Parameter               | Fit result             | 16 K |
|-------------------------|------------------------|------|
| $M_0$ (emu)             | 0.188                  | F    |
| $\beta$                 | 0.800                  | F    |
| $t_{\text{offset}}$ (s) | $1.32 \times 10^3$     | F    |
| $M_{\text{eq}}$ (emu)   | $1.869 \times 10^{-3}$ | L    |
| $\tau^*$ (s)            | 171.42                 | F    |

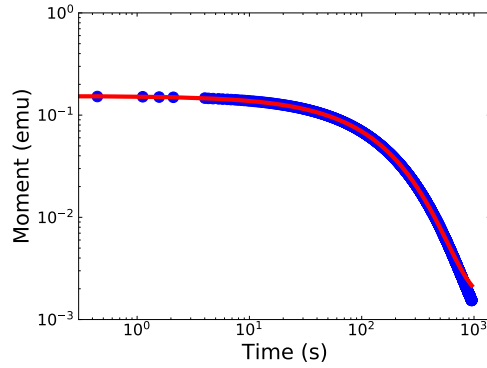

| Parameter               | Fit result             | 20 K |
|-------------------------|------------------------|------|
| $M_0$ (emu)             | 0.154                  | F    |
| $\beta$                 | 0.848                  | F    |
| $t_{\text{offset}}$ (s) | 0.16                   | F    |
| $M_{\text{eq}}$ (emu)   | $1.540 \times 10^{-3}$ | L    |
| $\tau^*$ (s)            | 127.46                 | F    |

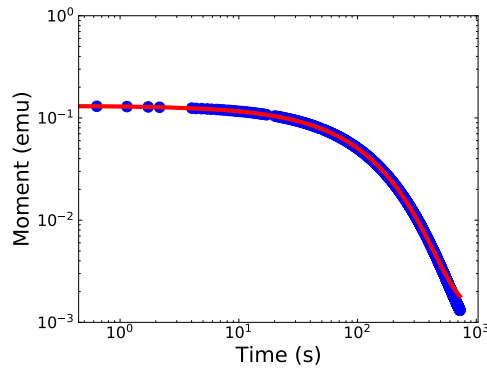

| Parameter               | Fit result             | 23 K |
|-------------------------|------------------------|------|
| $M_0$ (emu)             | 0.132                  | F    |
| $\beta$                 | 0.880                  | F    |
| $t_{\text{offset}}$ (s) | 0.22                   | F    |
| $M_{\text{eq}}$ (emu)   | $1.314 \times 10^{-3}$ | L    |
| $\tau^*$ (s)            | 102.85                 | F    |

Figure S89: DC decay curves fitted for  $M > 0.01 M_0$  to Eq. 11 with  $M_{\text{eq}}$  set to the last measured point and all other parameters fitted freely.

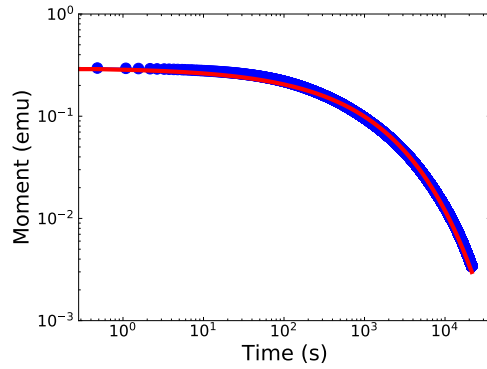

| Parameter               | Fit result | 2 K |
|-------------------------|------------|-----|
| $M_0$ (emu)             | 0.298      | X   |
| $\beta$                 | 0.466      | F   |
| $t_{\text{offset}}$ (s) | 0          | 0   |
| $M_{\text{eq}}$ (emu)   | 0          | 0   |
| $\tau^*$ (s)            | 814.26     | F   |

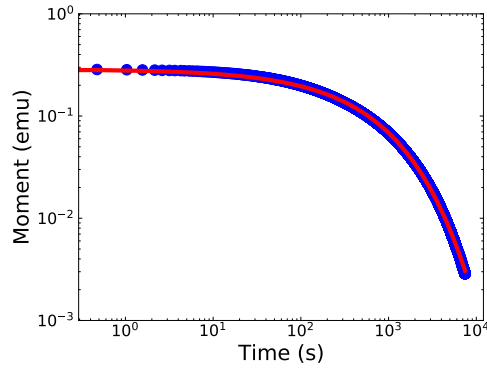

| Parameter               | Fit result | 4 K |
|-------------------------|------------|-----|
| $M_0$ (emu)             | 0.287      | X   |
| $\beta$                 | 0.574      | F   |
| $t_{\text{offset}}$ (s) | 0          | 0   |
| $M_{\text{eq}}$ (emu)   | 0          | 0   |
| $\tau^*$ (s)            | 534.19     | F   |

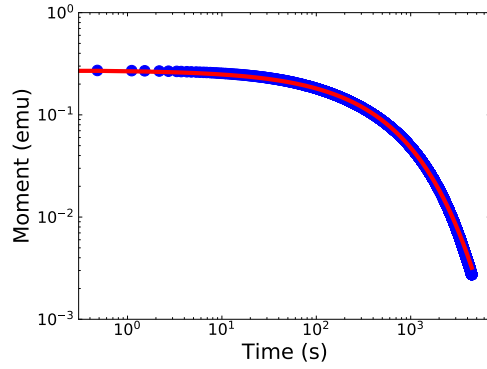

| Parameter               | Fit result | 6 K |
|-------------------------|------------|-----|
| $M_0$ (emu)             | 0.273      | X   |
| $\beta$                 | 0.627      | F   |
| $t_{\text{offset}}$ (s) | 0          | 0   |
| $M_{\text{eq}}$ (emu)   | 0          | 0   |
| $\tau^*$ (s)            | 410.92     | F   |

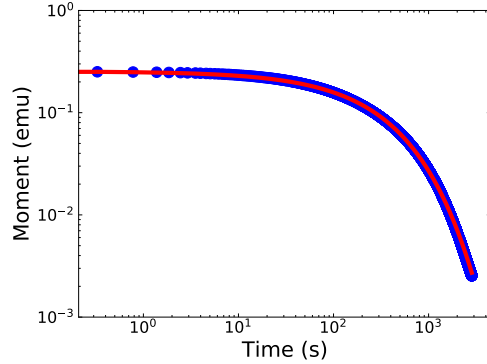

| Parameter               | Fit result | 9 K |
|-------------------------|------------|-----|
| $M_0$ (emu)             | 0.253      | X   |
| $\beta$                 | 0.675      | F   |
| $t_{\text{offset}}$ (s) | 0          | 0   |
| $M_{\text{eq}}$ (emu)   | 0          | 0   |
| $\tau^*$ (s)            | 302.79     | F   |

Figure S90: DC decay curves fitted for  $M > 0.01 M_0$  to Eq. 11 with  $M_{\text{eq}} = 0$  set to target magnetisation,  $M_0$  fixed to first measured point at target field,  $t_{\text{offset}} = 0$  and  $\alpha$  and  $\beta$  fitted freely.

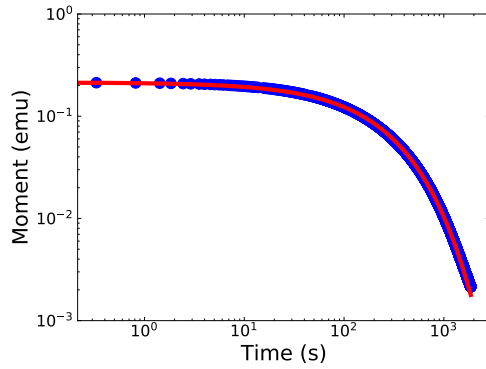

| Parameter               | Fit result | 13 K |
|-------------------------|------------|------|
| $M_0$ (emu)             | 0.214      | X    |
| $\beta$                 | 0.737      | F    |
| $t_{\text{offset}}$ (s) | 0          | 0    |
| $M_{\text{eq}}$ (emu)   | 0          | 0    |
| $\tau^*$ (s)            | 222.13     | F    |

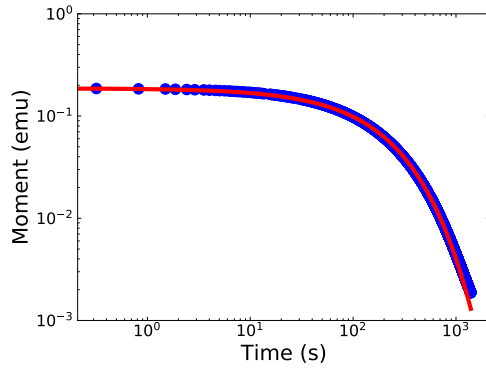

| Parameter               | Fit result | 16 K |
|-------------------------|------------|------|
| $M_0$ (emu)             | 0.187      | X    |
| $\beta$                 | 0.778      | F    |
| $t_{\text{offset}}$ (s) | 0          | 0    |
| $M_{\text{eq}}$ (emu)   | 0          | 0    |
| $\tau^*$ (s)            | 177.33     | F    |

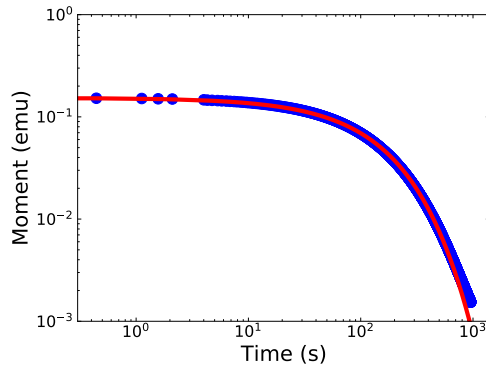

| Parameter               | Fit result | 20 K |
|-------------------------|------------|------|
| $M_0$ (emu)             | 0.153      | X    |
| $\beta$                 | 0.829      | F    |
| $t_{\text{offset}}$ (s) | 0          | 0    |
| $M_{\text{eq}}$ (emu)   | 0          | 0    |
| $\tau^*$ (s)            | 132.07     | F    |

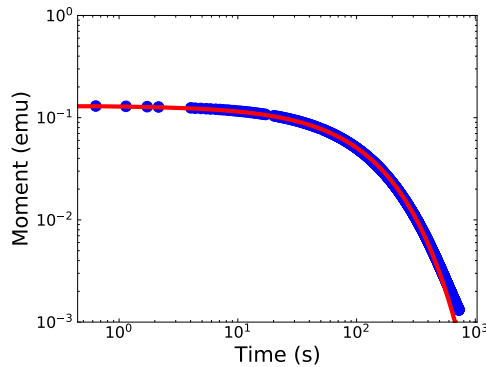

| Parameter               | Fit result | 23 K |
|-------------------------|------------|------|
| $M_0$ (emu)             | 0.131      | X    |
| $\beta$                 | 0.857      | F    |
| $t_{\text{offset}}$ (s) | 0          | 0    |
| $M_{\text{eq}}$ (emu)   | 0          | 0    |
| $\tau^*$ (s)            | 106.42     | F    |

Figure S91: DC decay curves fitted for  $M > 0.01 M_0$  to Eq. 11 with  $M_{\text{eq}} = 0$  set to target magnetisation,  $M_0$  fixed to first measured point at target field,  $t_{\text{offset}} = 0$  and  $\alpha$  and  $\beta$  fitted freely.

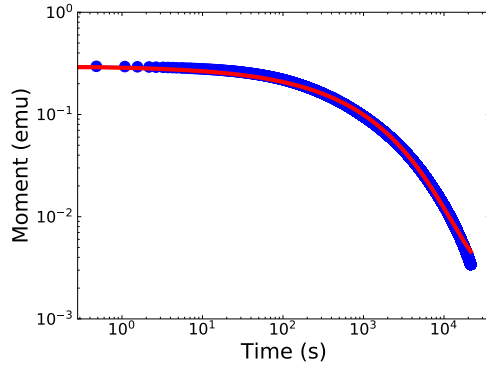

| Parameter               | Fit result             | 2 K |
|-------------------------|------------------------|-----|
| $M_0$ (emu)             | 0.298                  | X   |
| $\beta$                 | 0.487                  | F   |
| $t_{\text{offset}}$ (s) | 0                      | 0   |
| $M_{\text{eq}}$ (emu)   | $2.516 \times 10^{-3}$ | F   |
| $\tau^*$ (s)            | 796.55                 | F   |

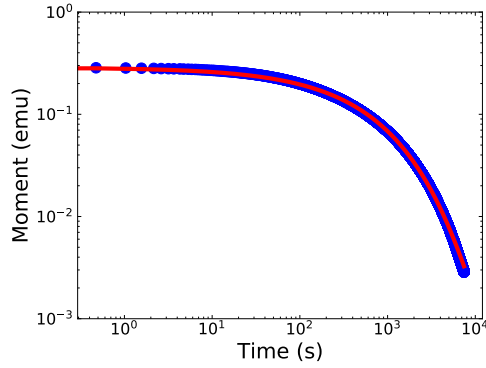

| Parameter               | Fit result             | 4 K |
|-------------------------|------------------------|-----|
| $M_0$ (emu)             | 0.287                  | X   |
| $\beta$                 | 0.487                  | F   |
| $t_{\text{offset}}$ (s) | 0                      | 0   |
| $M_{\text{eq}}$ (emu)   | $3.084 \times 10^{-4}$ | F   |
| $\tau^*$ (s)            | 532.44                 | F   |

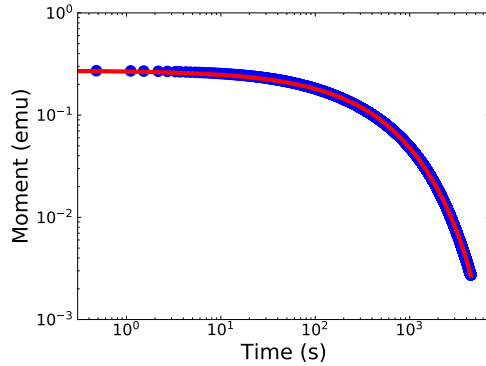

| Parameter               | Fit result              | 6 K |
|-------------------------|-------------------------|-----|
| $M_0$ (emu)             | 0.273                   | X   |
| $\beta$                 | 0.621                   | F   |
| $t_{\text{offset}}$ (s) | 0                       | 0   |
| $M_{\text{eq}}$ (emu)   | $-8.001 \times 10^{-4}$ | F   |
| $\tau^*$ (s)            | 414.59                  | F   |

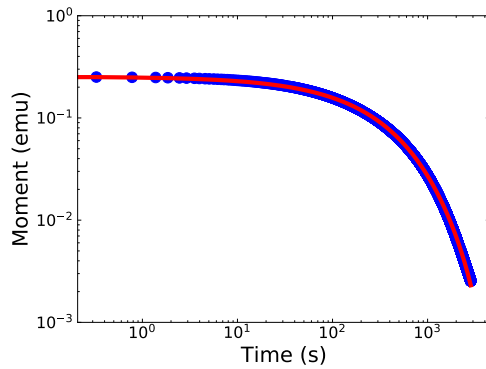

| Parameter               | Fit result              | 9 K |
|-------------------------|-------------------------|-----|
| $M_0$ (emu)             | 0.669                   | X   |
| $\beta$                 | 0.487                   | F   |
| $t_{\text{offset}}$ (s) | 0                       | 0   |
| $M_{\text{eq}}$ (emu)   | $-6.411 \times 10^{-4}$ | F   |
| $\tau^*$ (s)            | 305.04                  | F   |

Figure S92: DC decay curves fitted for  $M > 0.01 M_0$  to Eq. 11 with  $M_0$  fixed to first measured point at target field,  $t_{\text{offset}} = 0$  and all other parameters fitted freely.



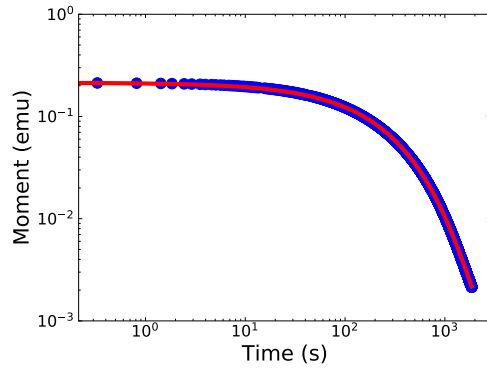

| Parameter               | Fit result             | 13 K |
|-------------------------|------------------------|------|
| $M_0$ (emu)             | 0.214                  | X    |
| $\beta$                 | 0.743                  | F    |
| $t_{\text{offset}}$ (s) | 0                      | 0    |
| $M_{\text{eq}}$ (emu)   | $5.399 \times 10^{-3}$ | F    |
| $\tau^*$ (s)            | 220.60                 | F    |

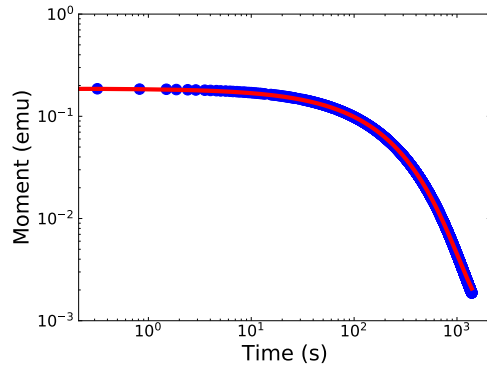

| Parameter               | Fit result             | 16 K |
|-------------------------|------------------------|------|
| $M_0$ (emu)             | 0.187                  | X    |
| $\beta$                 | 0.792                  | F    |
| $t_{\text{offset}}$ (s) | 0                      | 0    |
| $M_{\text{eq}}$ (emu)   | $1.013 \times 10^{-3}$ | F    |
| $\tau^*$ (s)            | 174.80                 | F    |

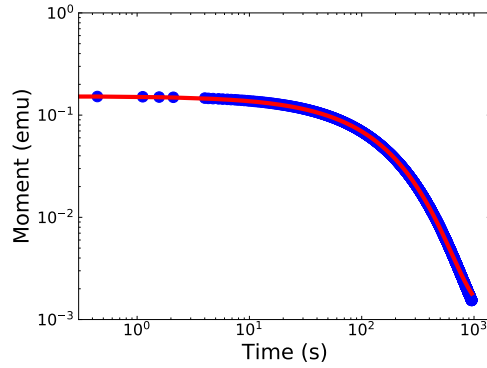

| Parameter               | Fit result             | 20 K |
|-------------------------|------------------------|------|
| $M_0$ (emu)             | 0.153                  | X    |
| $\beta$                 | 0.847                  | F    |
| $t_{\text{offset}}$ (s) | 0                      | 0    |
| $M_{\text{eq}}$ (emu)   | $1.124 \times 10^{-3}$ | F    |
| $\tau^*$ (s)            | 129.58                 | F    |

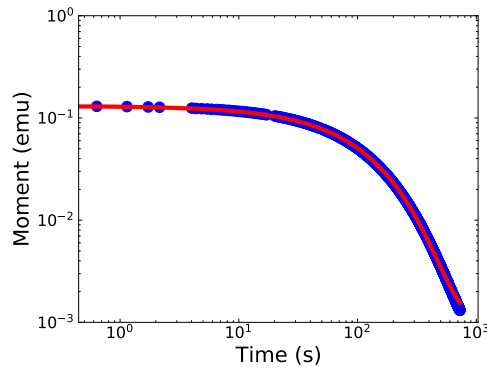

| Parameter               | Fit result             | 23 K |
|-------------------------|------------------------|------|
| $M_0$ (emu)             | 0.131                  | X    |
| $\beta$                 | 0.880                  | F    |
| $t_{\text{offset}}$ (s) | 0                      | 0    |
| $M_{\text{eq}}$ (emu)   | $1.022 \times 10^{-3}$ | F    |
| $\tau^*$ (s)            | 104.37                 | F    |

Figure S93: DC decay curves fitted for  $M > 0.01 M_0$  to Eq. 11 with  $M_0$  fixed to first measured point at target field,  $t_{\text{offset}} = 0$  and all other parameters fitted freely.



| Parameter               | Fit result              | 2 K |
|-------------------------|-------------------------|-----|
| $M_0$ (emu)             | 0.298                   | X   |
| $\beta$                 | 0.487                   | F   |
| $t_{\text{offset}}$ (s) | $1.518 \times 10^{-26}$ | F   |
| $M_{\text{eq}}$ (emu)   | $2.516 \times 10^{-3}$  | F   |
| $\tau^*$ (s)            | 796.55                  | F   |

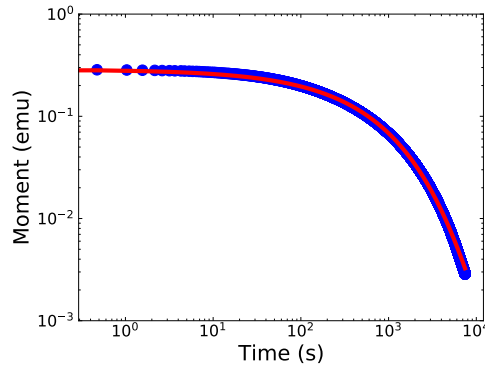

| Parameter               | Fit result              | 4 K |
|-------------------------|-------------------------|-----|
| $M_0$ (emu)             | 0.287                   | X   |
| $\beta$                 | 0.577                   | F   |
| $t_{\text{offset}}$ (s) | $9.014 \times 10^{-23}$ | F   |
| $M_{\text{eq}}$ (emu)   | $3.084 \times 10^{-4}$  | F   |
| $\tau^*$ (s)            | 532.44                  | F   |

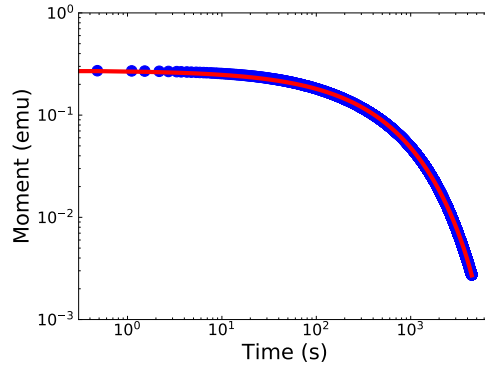

| Parameter               | Fit result              | 6 K |
|-------------------------|-------------------------|-----|
| $M_0$ (emu)             | 0.273                   | X   |
| $\beta$                 | 0.621                   | F   |
| $t_{\text{offset}}$ (s) | $7.560 \times 10^{-21}$ | F   |
| $M_{\text{eq}}$ (emu)   | $-8.001 \times 10^{-4}$ | F   |
| $\tau^*$ (s)            | 414.59                  | F   |

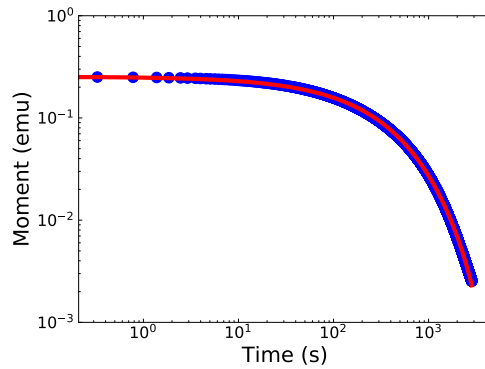

| Parameter               | Fit result              | 9 K |
|-------------------------|-------------------------|-----|
| $M_0$ (emu)             | 0.253                   | X   |
| $\beta$                 | 0.669                   | F   |
| $t_{\text{offset}}$ (s) | $9.235 \times 10^{-23}$ | F   |
| $M_{\text{eq}}$ (emu)   | $-6.411 \times 10^{-4}$ | F   |
| $\tau^*$ (s)            | 305.04                  | F   |

Figure S94: DC decay curves fitted for  $M > 0.01 M_0$  to Eq. 11 with  $M_0$  fixed to first measured point at target field and all other parameters fitted freely.

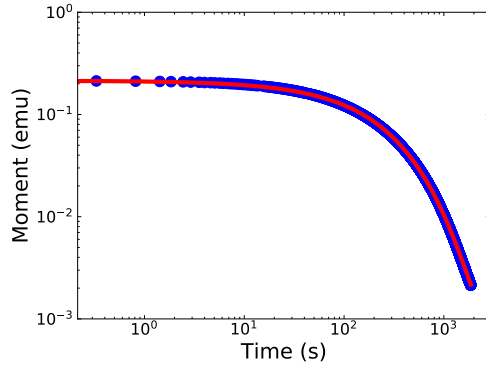

| Parameter               | Fit result              | 13 K |
|-------------------------|-------------------------|------|
| $M_0$ (emu)             | 0.214                   | X    |
| $\beta$                 | 0.743                   | F    |
| $t_{\text{offset}}$ (s) | $1.957 \times 10^{-21}$ | F    |
| $M_{\text{eq}}$ (emu)   | $5.399 \times 10^{-4}$  | F    |
| $\tau^*$ (s)            | 220.60                  | F    |

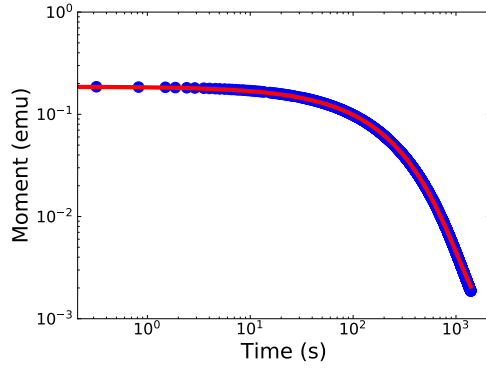

| Parameter               | Fit result              | 16 K |
|-------------------------|-------------------------|------|
| $M_0$ (emu)             | 0.187                   | X    |
| $\beta$                 | 0.792                   | F    |
| $t_{\text{offset}}$ (s) | $1.073 \times 10^{-18}$ | F    |
| $M_{\text{eq}}$ (emu)   | $1.013 \times 10^{-3}$  | F    |
| $\tau^*$ (s)            | 174.80                  | F    |

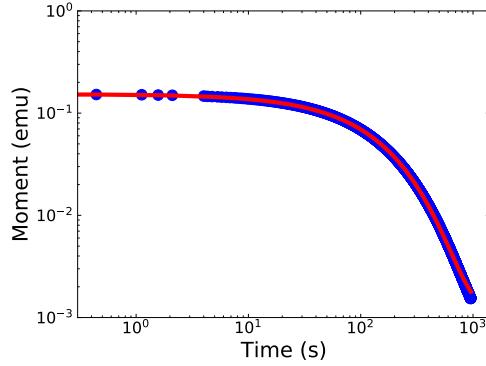

| Parameter               | Fit result              | 20 K |
|-------------------------|-------------------------|------|
| $M_0$ (emu)             | 0.153                   | X    |
| $\beta$                 | 0.847                   | F    |
| $t_{\text{offset}}$ (s) | $5.505 \times 10^{-14}$ | F    |
| $M_{\text{eq}}$ (emu)   | $1.124 \times 10^{-3}$  | F    |
| $\tau^*$ (s)            | 129.58                  | F    |

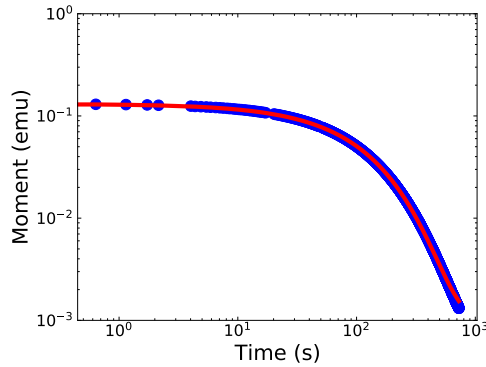

| Parameter               | Fit result              | 23 K |
|-------------------------|-------------------------|------|
| $M_0$ (emu)             | 0.131                   | X    |
| $\beta$                 | 0.880                   | F    |
| $t_{\text{offset}}$ (s) | $4.602 \times 10^{-17}$ | F    |
| $M_{\text{eq}}$ (emu)   | $1.022 \times 10^{-3}$  | F    |
| $\tau^*$ (s)            | 104.37                  | F    |

Figure S95: DC decay curves fitted for  $M > 0.01 M_0$  to Eq. 11 with  $M_0$  fixed to first measured point at target field and all other parameters fitted freely.

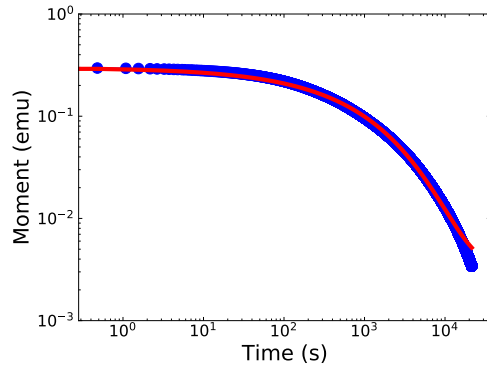

| Parameter               | Fit result              | 2 K |
|-------------------------|-------------------------|-----|
| $M_0$ (emu)             | 0.298                   | X   |
| $\beta$                 | 0.494                   | F   |
| $t_{\text{offset}}$ (s) | $2.137 \times 10^{-19}$ | F   |
| $M_{\text{eq}}$ (emu)   | $3.411 \times 10^{-3}$  | L   |
| $\tau^*$ (s)            | 790.23                  | F   |

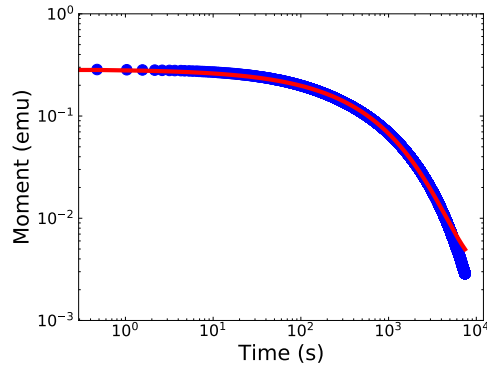

| Parameter               | Fit result              | 4 K |
|-------------------------|-------------------------|-----|
| $M_0$ (emu)             | 0.287                   | X   |
| $\beta$                 | 0.597                   | F   |
| $t_{\text{offset}}$ (s) | $3.044 \times 10^{-19}$ | F   |
| $M_{\text{eq}}$ (emu)   | $2.867 \times 10^{-3}$  | L   |
| $\tau^*$ (s)            | 518.15                  | F   |

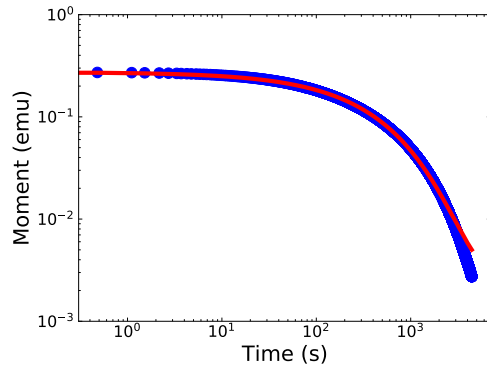

| Parameter               | Fit result              | 6 K |
|-------------------------|-------------------------|-----|
| $M_0$ (emu)             | 0.273                   | X   |
| $\beta$                 | 0.649                   | F   |
| $t_{\text{offset}}$ (s) | $4.573 \times 10^{-21}$ | F   |
| $M_{\text{eq}}$ (emu)   | $2.736 \times 10^{-3}$  | L   |
| $\tau^*$ (s)            | 398.67                  | F   |

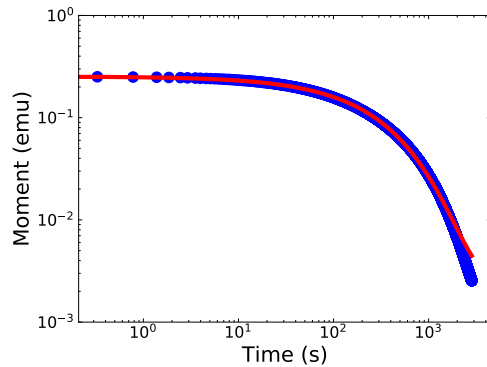

| Parameter               | Fit result             | 9 K |
|-------------------------|------------------------|-----|
| $M_0$ (emu)             | 0.253                  | X   |
| $\beta$                 | 0.698                  | F   |
| $t_{\text{offset}}$ (s) | 0.14                   | F   |
| $M_{\text{eq}}$ (emu)   | $2.536 \times 10^{-3}$ | L   |
| $\tau^*$ (s)            | 294.30                 | F   |

Figure S96: DC decay curves fitted for  $M > 0.01 M_0$  to Eq. 11 with  $M_0$  fixed to first measured point at target field,  $M_{\text{eq}}$  set to the last measured point and all other parameters fitted freely.

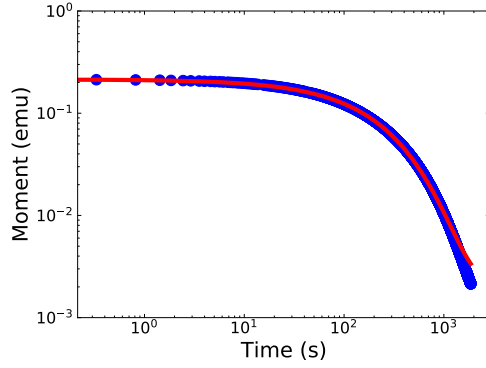

| Parameter               | Fit result              | 13 K |
|-------------------------|-------------------------|------|
| $M_0$ (emu)             | 0.214                   | X    |
| $\beta$                 | 0.762                   | F    |
| $t_{\text{offset}}$ (s) | $1.815 \times 10^{-16}$ | F    |
| $M_{\text{eq}}$ (emu)   | $2.141 \times 10^{-3}$  | L    |
| $\tau^*$ (s)            | 216.15                  | F    |

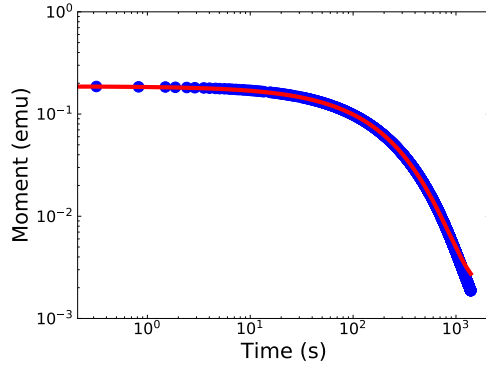

| Parameter               | Fit result              | 16 K |
|-------------------------|-------------------------|------|
| $M_0$ (emu)             | 0.187                   | X    |
| $\beta$                 | 0.804                   | F    |
| $t_{\text{offset}}$ (s) | $3.397 \times 10^{-19}$ | F    |
| $M_{\text{eq}}$ (emu)   | $1.869 \times 10^{-3}$  | L    |
| $\tau^*$ (s)            | 172.70                  | F    |

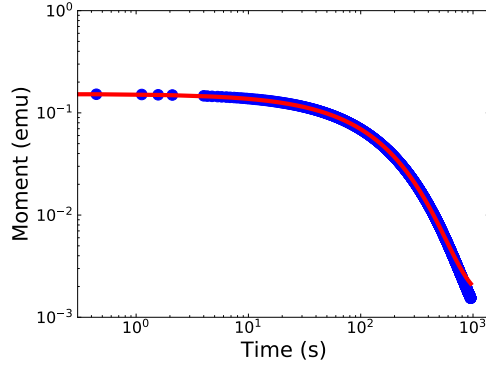

| Parameter               | Fit result              | 20 K |
|-------------------------|-------------------------|------|
| $M_0$ (emu)             | 0.153                   | X    |
| $\beta$                 | 0.854                   | F    |
| $t_{\text{offset}}$ (s) | $7.530 \times 10^{-14}$ | F    |
| $M_{\text{eq}}$ (emu)   | $1.540 \times 10^{-3}$  | L    |
| $\tau^*$ (s)            | 128.68                  | F    |

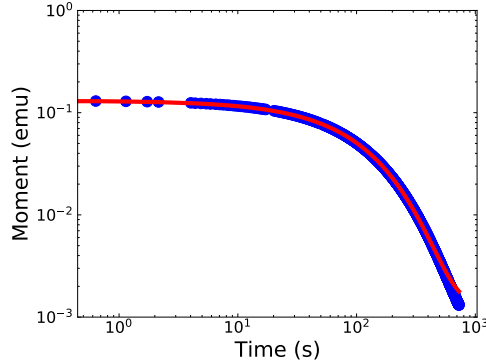

| Parameter               | Fit result              | 23 K |
|-------------------------|-------------------------|------|
| $M_0$ (emu)             | 0.131                   | X    |
| $\beta$                 | 0.886                   | F    |
| $t_{\text{offset}}$ (s) | $1.155 \times 10^{-14}$ | F    |
| $M_{\text{eq}}$ (emu)   | $1.314 \times 10^{-3}$  | L    |
| $\tau^*$ (s)            | 103.80                  | F    |

Figure S97: DC decay curves fitted for  $M > 0.01 M_0$  to Eq. 11 with  $M_0$  fixed to first measured point at target field,  $M_{\text{eq}}$  set to the last measured point and all other parameters fitted freely.



| Parameter               | Fit result              | 2 K |
|-------------------------|-------------------------|-----|
| $M_0$ (emu)             | 0.298                   | X   |
| $\beta$                 | 0.466                   | F   |
| $t_{\text{offset}}$ (s) | $8.376 \times 10^{-23}$ | F   |
| $M_{\text{eq}}$ (emu)   | 0                       | 0   |
| $\tau^*$ (s)            | 814.26                  | F   |



| Parameter               | Fit result              | 4 K |
|-------------------------|-------------------------|-----|
| $M_0$ (emu)             | 0.287                   | X   |
| $\beta$                 | 0.574                   | F   |
| $t_{\text{offset}}$ (s) | $2.491 \times 10^{-21}$ | F   |
| $M_{\text{eq}}$ (emu)   | 0                       | 0   |
| $\tau^*$ (s)            | 534.19                  | F   |

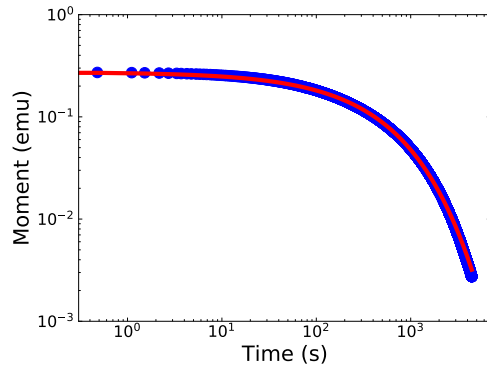

| Parameter               | Fit result              | 6 K |
|-------------------------|-------------------------|-----|
| $M_0$ (emu)             | 0.273                   | X   |
| $\beta$                 | 0.627                   | F   |
| $t_{\text{offset}}$ (s) | $4.871 \times 10^{-23}$ | F   |
| $M_{\text{eq}}$ (emu)   | 0                       | 0   |
| $\tau^*$ (s)            | 410.92                  | F   |

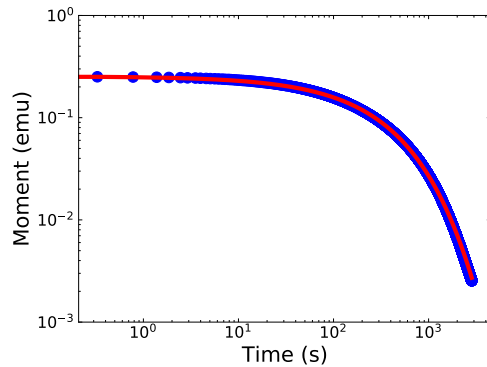

| Parameter               | Fit result              | 9 K |
|-------------------------|-------------------------|-----|
| $M_0$ (emu)             | 0.253                   | X   |
| $\beta$                 | 0.675                   | F   |
| $t_{\text{offset}}$ (s) | $1.044 \times 10^{-19}$ | F   |
| $M_{\text{eq}}$ (emu)   | 0                       | 0   |
| $\tau^*$ (s)            | 302.79                  | F   |

Figure S98: DC decay curves fitted for  $M > 0.01 M_0$  to Eq. 11 with  $M_0$  fixed to first measured point at target field,  $M_{\text{eq}}$  set to the target magnetisation and all other parameters fitted freely.

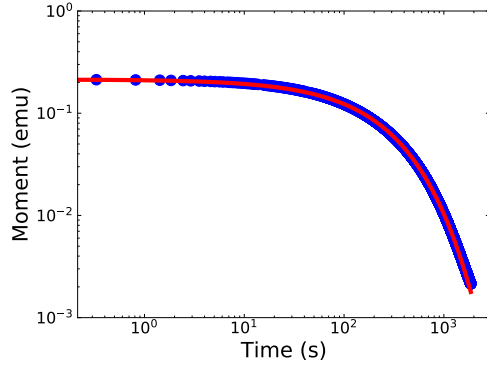

| Parameter               | Fit result              | 13 K |
|-------------------------|-------------------------|------|
| $M_0$ (emu)             | 0.214                   | X    |
| $\beta$                 | 0.737                   | F    |
| $t_{\text{offset}}$ (s) | $2.656 \times 10^{-23}$ | F    |
| $M_{\text{eq}}$ (emu)   | 0                       | 0    |
| $\tau^*$ (s)            | 222.13                  | F    |

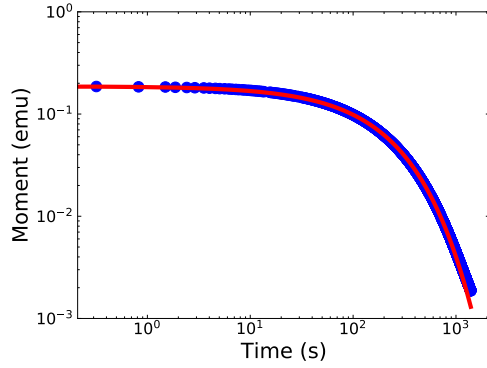

| Parameter               | Fit result              | 16 K |
|-------------------------|-------------------------|------|
| $M_0$ (emu)             | 0.187                   | X    |
| $\beta$                 | 0.778                   | F    |
| $t_{\text{offset}}$ (s) | $3.666 \times 10^{-23}$ | F    |
| $M_{\text{eq}}$ (emu)   | 0                       | 0    |
| $\tau^*$ (s)            | 177.33                  | F    |

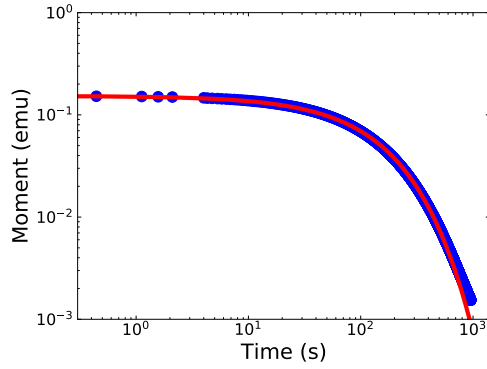

| Parameter               | Fit result              | 20 K |
|-------------------------|-------------------------|------|
| $M_0$ (emu)             | 0.153                   | X    |
| $\beta$                 | 0.827                   | F    |
| $t_{\text{offset}}$ (s) | $9.326 \times 10^{-24}$ | F    |
| $M_{\text{eq}}$ (emu)   | 0                       | 0    |
| $\tau^*$ (s)            | 132.07                  | F    |

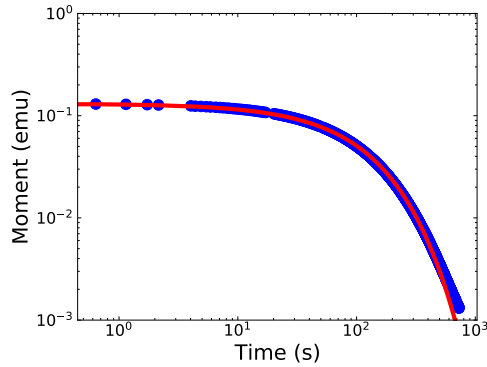

| Parameter               | Fit result              | 23 K |
|-------------------------|-------------------------|------|
| $M_0$ (emu)             | 0.131                   | X    |
| $\beta$                 | 0.857                   | F    |
| $t_{\text{offset}}$ (s) | $2.609 \times 10^{-20}$ | F    |
| $M_{\text{eq}}$ (emu)   | 0                       | 0    |
| $\tau^*$ (s)            | 106.42                  | F    |

Figure S99: DC decay curves fitted for  $M > 0.01 M_0$  to Eq. 11 with  $M_0$  fixed to first measured point at target field,  $M_{\text{eq}}$  set to the target magnetisation and all other parameters fitted freely.

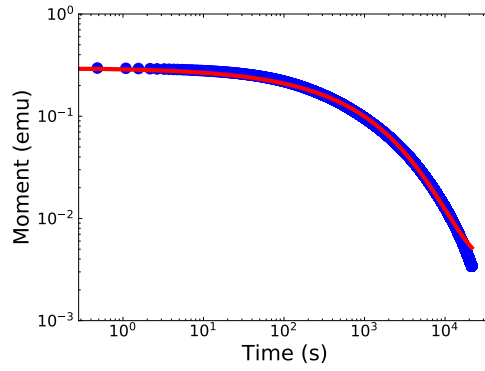

| Parameter               | Fit result             | 2 K |
|-------------------------|------------------------|-----|
| $M_0$ (emu)             | 0.298                  | X   |
| $\beta$                 | 0.494                  | F   |
| $t_{\text{offset}}$ (s) | 0                      | 0   |
| $M_{\text{eq}}$ (emu)   | $3.411 \times 10^{-3}$ | L   |
| $\tau^*$ (s)            | 790.23                 | F   |

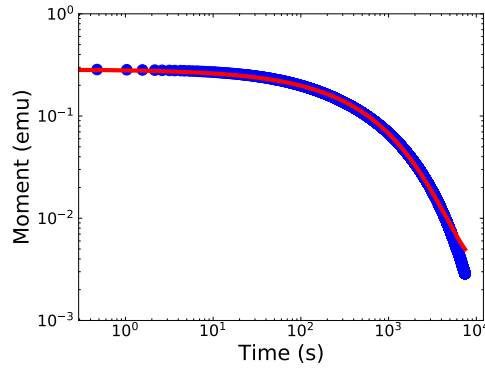

| Parameter               | Fit result             | 4 K |
|-------------------------|------------------------|-----|
| $M_0$ (emu)             | 0.287                  | X   |
| $\beta$                 | 0.597                  | F   |
| $t_{\text{offset}}$ (s) | 0                      | 0   |
| $M_{\text{eq}}$ (emu)   | $2.867 \times 10^{-3}$ | L   |
| $\tau^*$ (s)            | 518.15                 | F   |

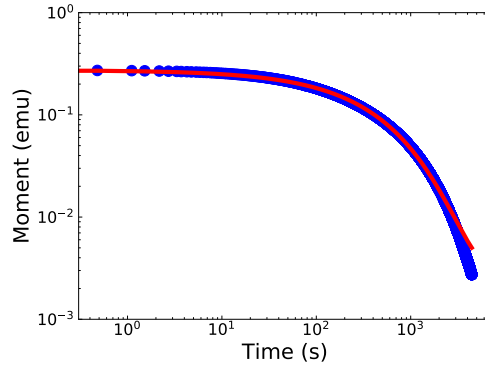

| Parameter               | Fit result             | 6 K |
|-------------------------|------------------------|-----|
| $M_0$ (emu)             | 0.273                  | X   |
| $\beta$                 | 0.649                  | F   |
| $t_{\text{offset}}$ (s) | 0                      | 0   |
| $M_{\text{eq}}$ (emu)   | $2.736 \times 10^{-3}$ | L   |
| $\tau^*$ (s)            | 398.67                 | F   |

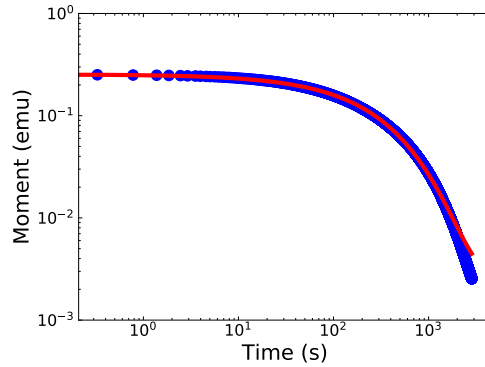

| Parameter               | Fit result             | 9 K |
|-------------------------|------------------------|-----|
| $M_0$ (emu)             | 0.253                  | X   |
| $\beta$                 | 0.697                  | F   |
| $t_{\text{offset}}$ (s) | 0                      | 0   |
| $M_{\text{eq}}$ (emu)   | $2.536 \times 10^{-3}$ | L   |
| $\tau^*$ (s)            | 294.08                 | F   |

Figure S100: DC decay curves fitted for  $M > 0.01 M_0$  to Eq. 11 with  $M_0$  fixed to first measured point at target field,  $M_{\text{eq}}$  set to the target magnetisation and all other parameters fitted freely.





| Parameter               | Fit result             | 13 K |
|-------------------------|------------------------|------|
| $M_0$ (emu)             | 0.214                  | X    |
| $\beta$                 | 0.762                  | F    |
| $t_{\text{offset}}$ (s) | 0                      | 0    |
| $M_{\text{eq}}$ (emu)   | $2.141 \times 10^{-3}$ | L    |
| $\tau^*$ (s)            | 216.15                 | F    |



| Parameter               | Fit result             | 16 K |
|-------------------------|------------------------|------|
| $M_0$ (emu)             | 0.187                  | X    |
| $\beta$                 | 0.804 m                | F    |
| $t_{\text{offset}}$ (s) | 0                      | 0    |
| $M_{\text{eq}}$ (emu)   | $1.869 \times 10^{-3}$ | L    |
| $\tau^*$ (s)            | 172.70                 | F    |

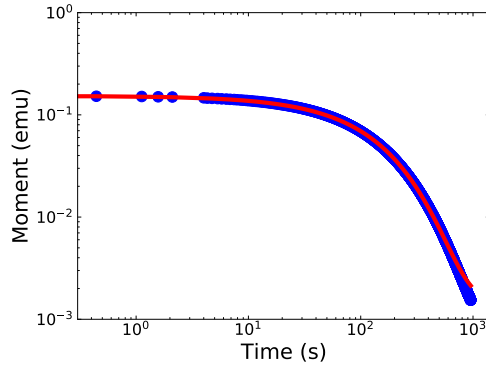

| Parameter               | Fit result             | 20 K |
|-------------------------|------------------------|------|
| $M_0$ (emu)             | 0.153                  | X    |
| $\beta$                 | 0.854                  | F    |
| $t_{\text{offset}}$ (s) | 0                      | 0    |
| $M_{\text{eq}}$ (emu)   | $1.540 \times 10^{-3}$ | L    |
| $\tau^*$ (s)            | 128.68                 | F    |

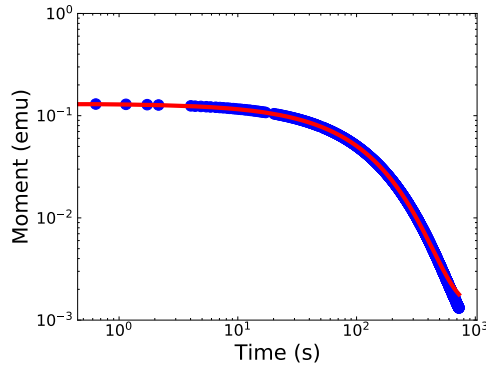

| Parameter               | Fit result             | 23 K |
|-------------------------|------------------------|------|
| $M_0$ (emu)             | 0.131                  | X    |
| $\beta$                 | 0.886                  | F    |
| $t_{\text{offset}}$ (s) | 0                      | 0    |
| $M_{\text{eq}}$ (emu)   | $1.314 \times 10^{-3}$ | L    |
| $\tau^*$ (s)            | 103.80                 | F    |

Figure S101: DC decay curves fitted for  $M > 0.01 M_0$  to Eq. 11 with  $M_0$  fixed to first measured point at target field,  $M_{\text{eq}}$  set to the target magnetisation and all other parameters fitted freely.

## S2.6 Comparison of relaxation rates

We compare the extracted  $\tau^*$  from fitting DC decay measurements of  $[\text{Dy}(\text{Dtp})_2][\text{Al}\{\text{OC}(\text{CF}_3)_3\}_4]$  without the data corresponding to  $M < 0.01M_0$  to Eq. 11, and associated  $\tau_{\text{mode}}$ ,  $\langle \tau \rangle$  and  $e^{\langle \ln[\tau] \rangle}$  values to the  $\tau_{\text{debye}}$  obtained from the Waveform measurements.

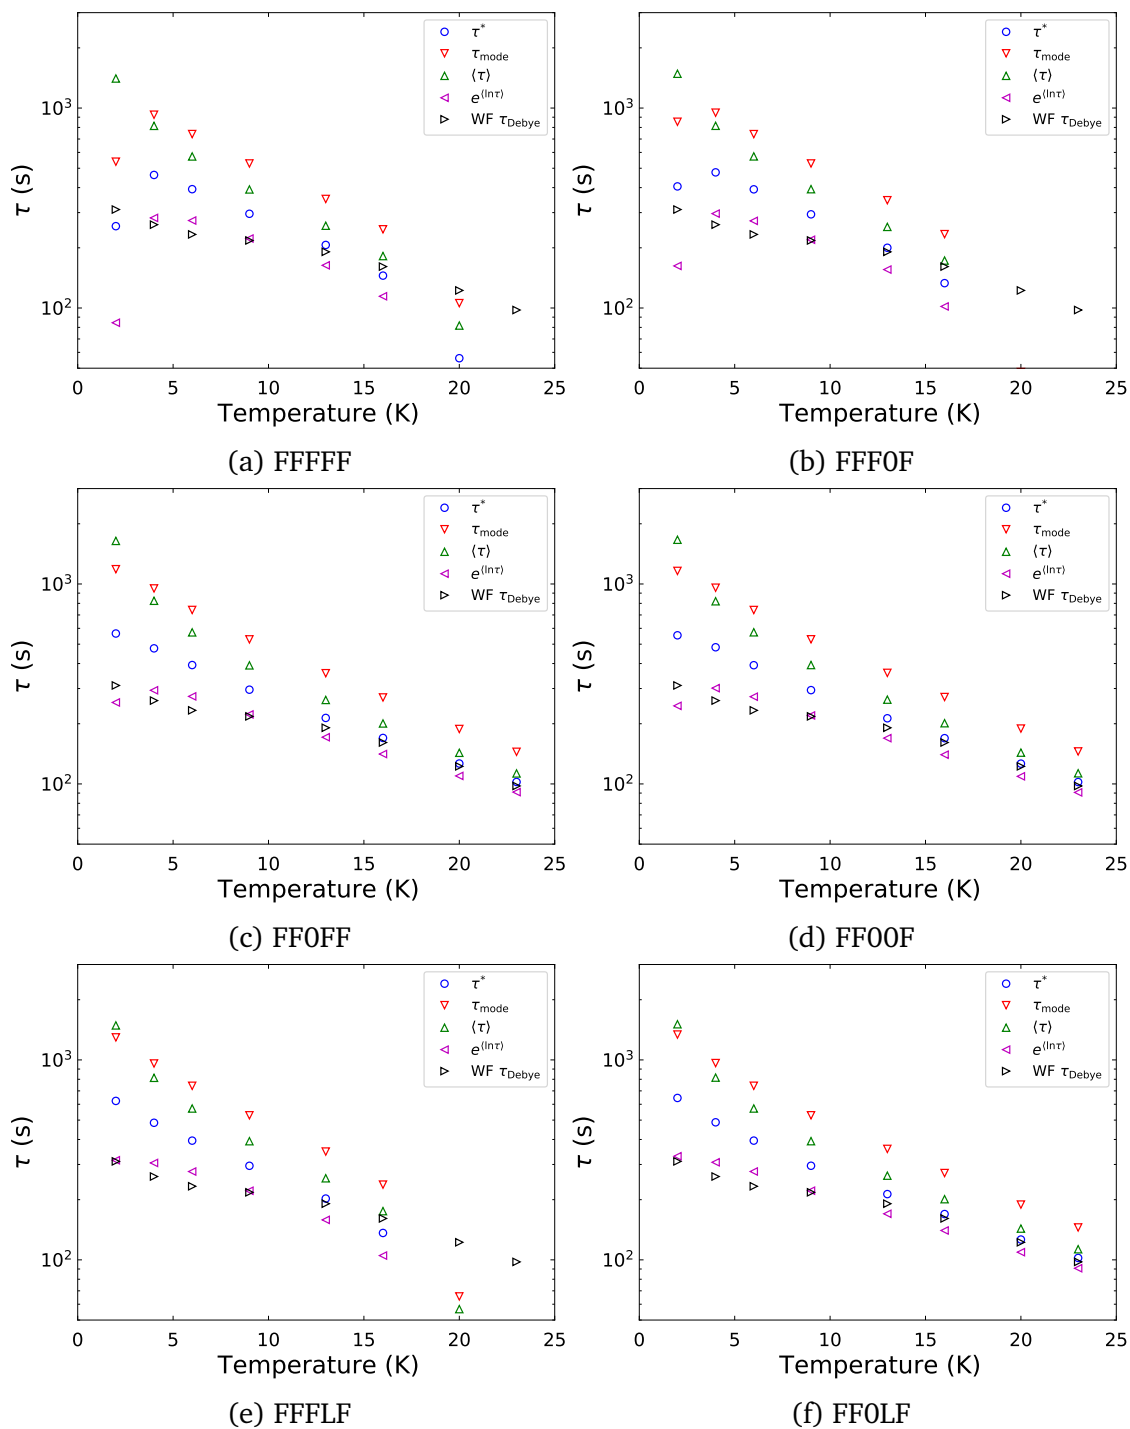

Figure S102: Comparison of relaxation rate extracted from waveform measurements of  $[\text{Dy}(\text{Dtp})_2][\text{Al}\{\text{OC}(\text{CF}_3)_3\}_4]$  to the four metrics of the rate that were obtained from fitting the full DC decay data.  $M_0$  is freely fitted. **The sub-figure caption labelling scheme is described in Table S15.**

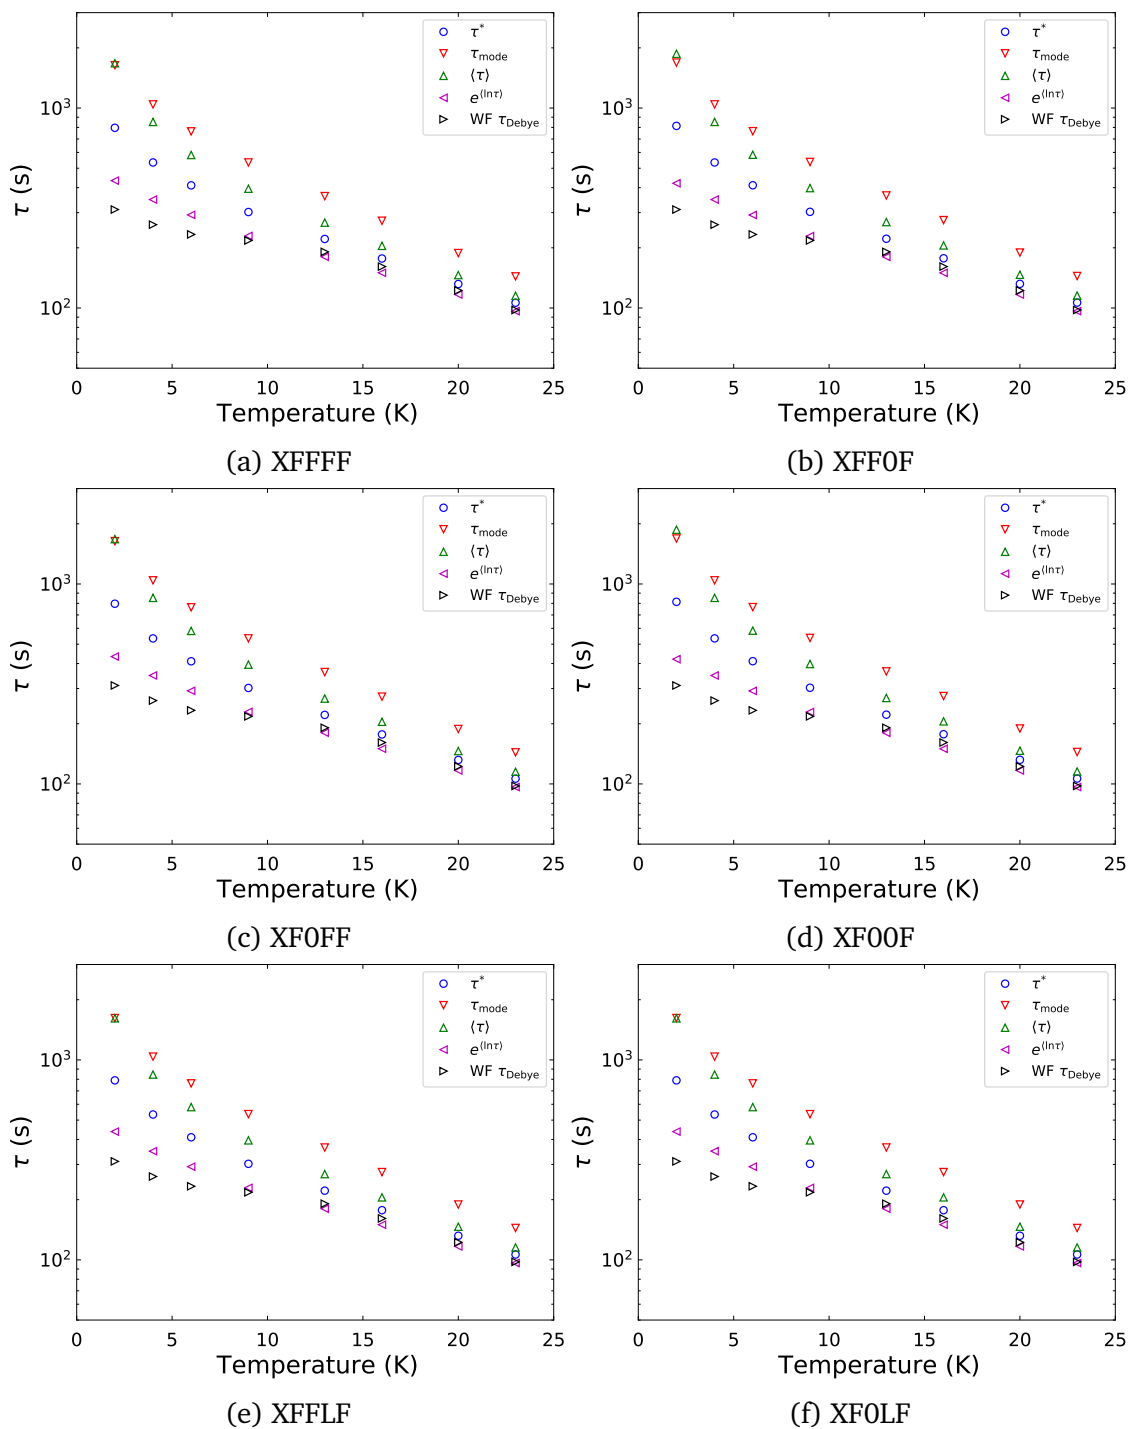

Figure S103: Comparison of relaxation rate extracted from waveform measurements of  $[\text{Dy}(\text{Dtp})_2][\text{Al}\{\text{OC}(\text{CF}_3)_3\}_4]$  to the four metrics of the rate that were obtained from fitting the full DC decay data.  $M_0$  is fixed to the first measured point. **The sub-figure labelling scheme is described in Table S15.**

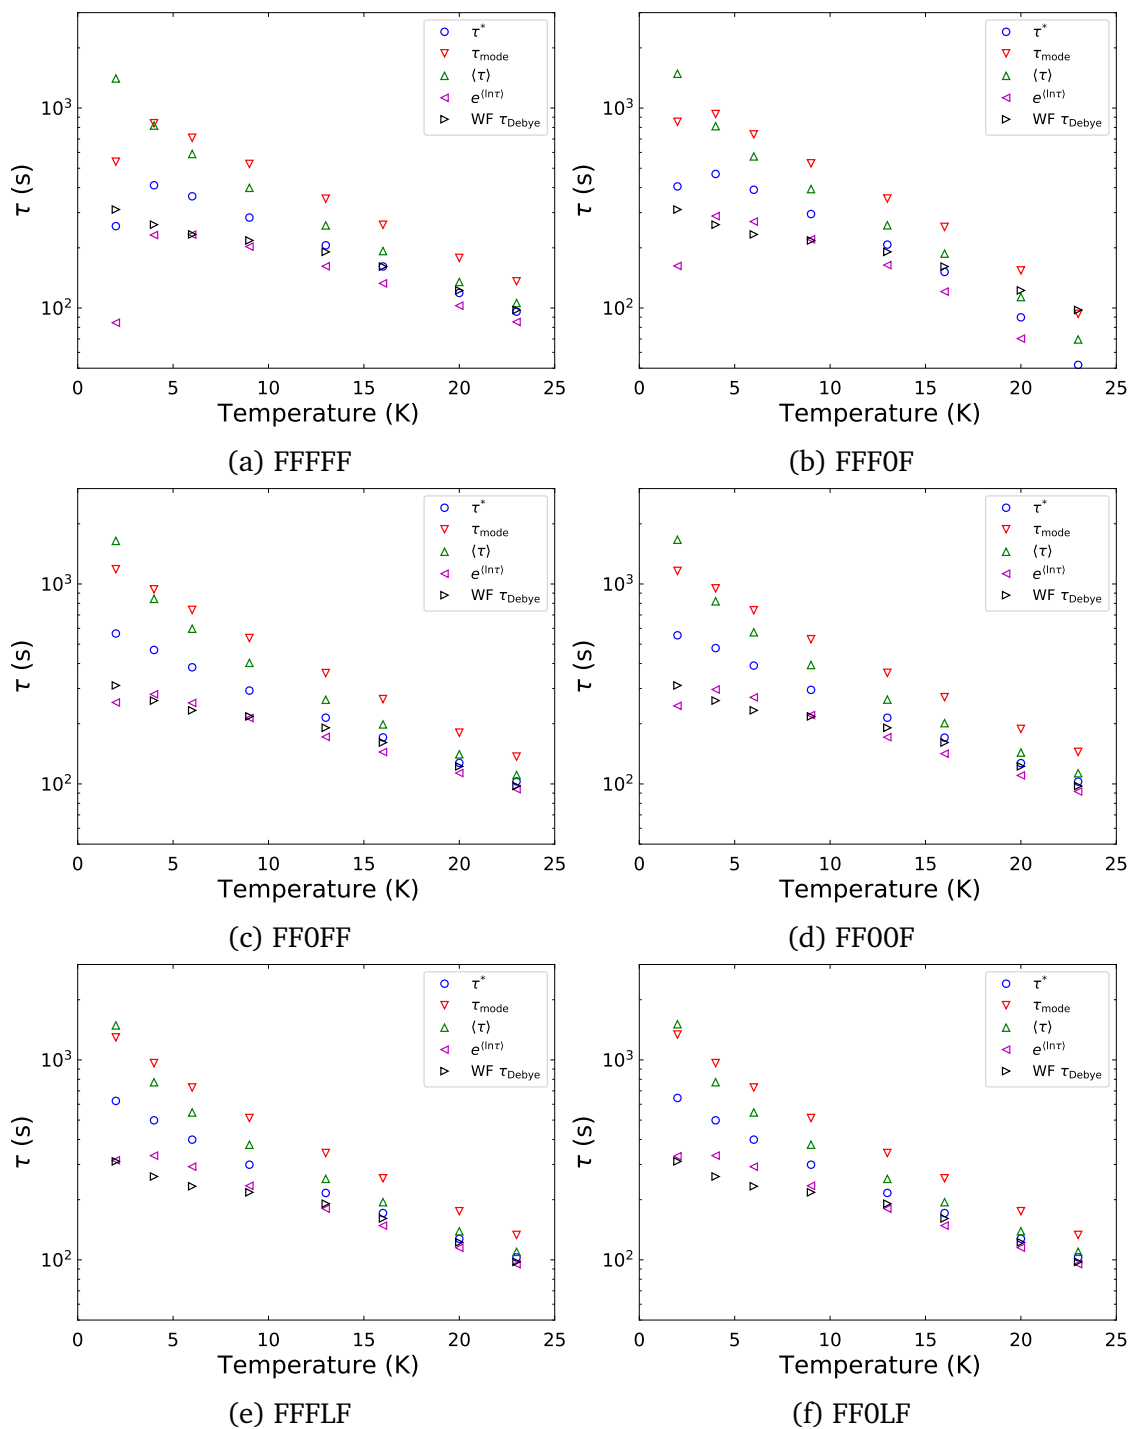

Figure S104: Comparison of relaxation rate extracted from waveform measurements of  $[\text{Dy}(\text{Dtp})_2][\text{Al}\{\text{OC}(\text{CF}_3)_3\}_4]$  to the four metrics of the rate that were obtained from fitting  $> 1\% M_0$  of the DC decay data.  $M_0$  is freely fitted. **The sub-figure labelling scheme is described in Table S15.**

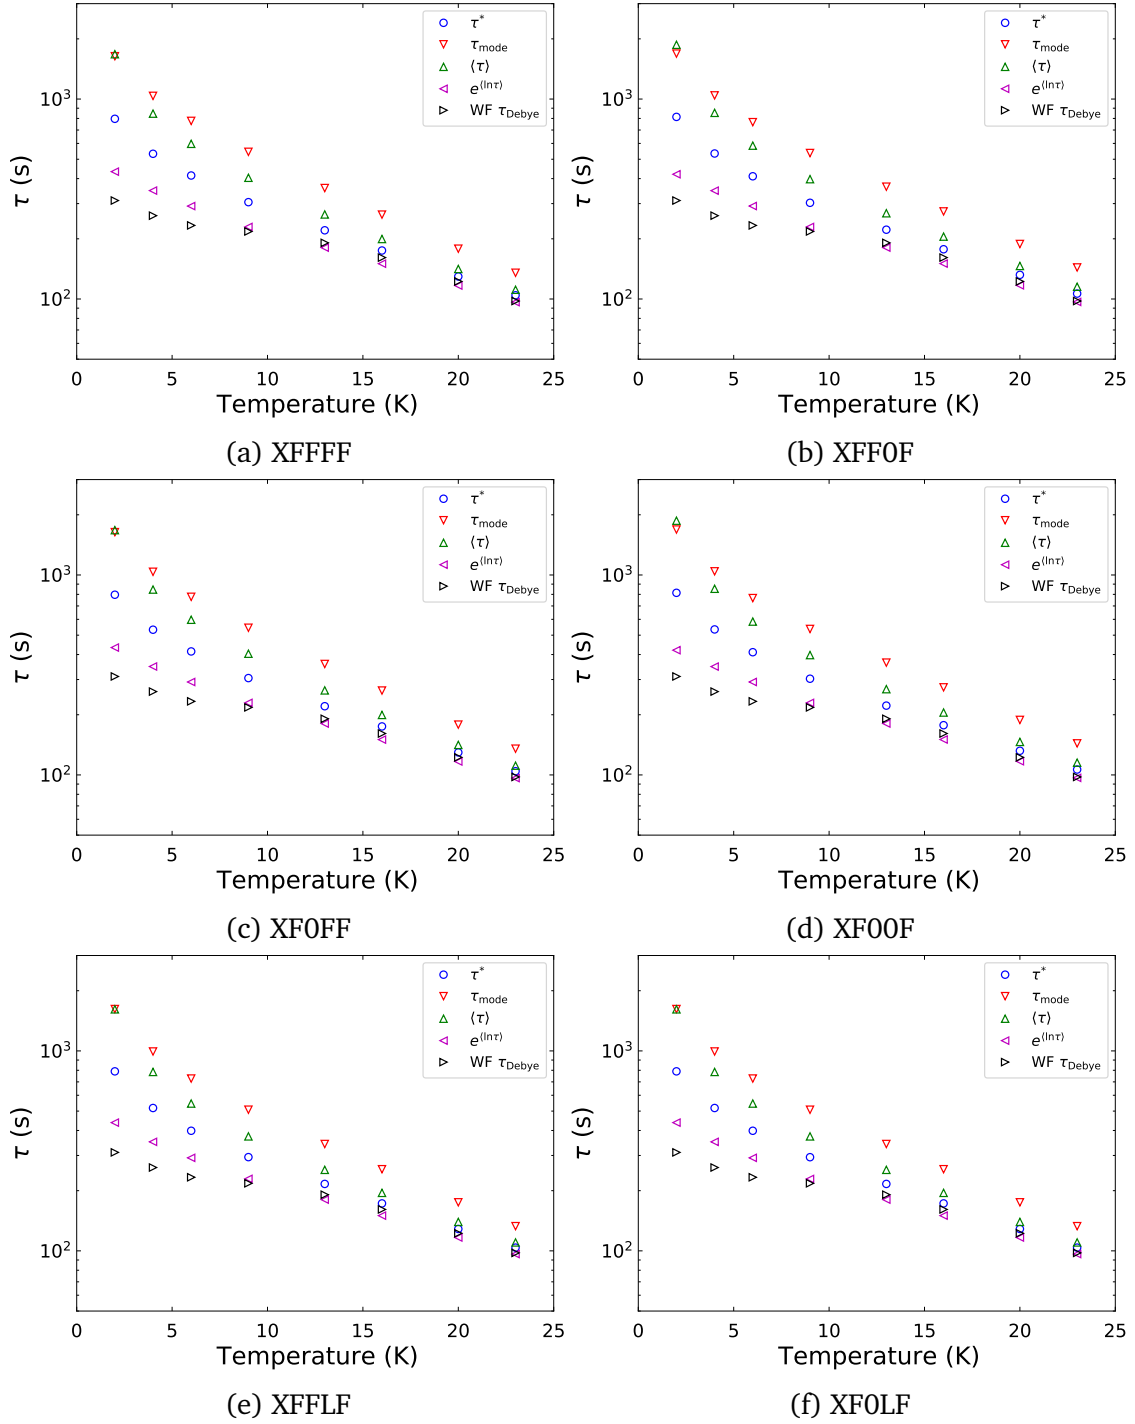

Figure S105: Comparison of relaxation rate extracted from waveform measurements of  $[\text{Dy}(\text{Dtp})_2][\text{Al}\{\text{OC}(\text{CF}_3)_3\}_4]$  to the four metrics of the rate that were obtained from fitting  $> 1\%$   $M_0$  of the DC decay data.  $M_0$  is fixed to the first measured point. **The sub-figure labelling scheme is described in Table S15.**

## S2.7 Fitting of relaxation dynamics

Fitting of relaxation dynamics of  $[\text{Dy}(\text{Dtp})_2][\text{Al}\{\text{OC}(\text{CF}_3)_3\}_4]$  were performed using the relaxation module in CCFIT2, using the models described in Eq. 10 and Eq. S1.

$$\log [\tau^{-1}] = \log \left[ 10^{-A} e^{-U_{\text{eff}}/T} + 10^R T^n \right] \quad (\text{S1})$$

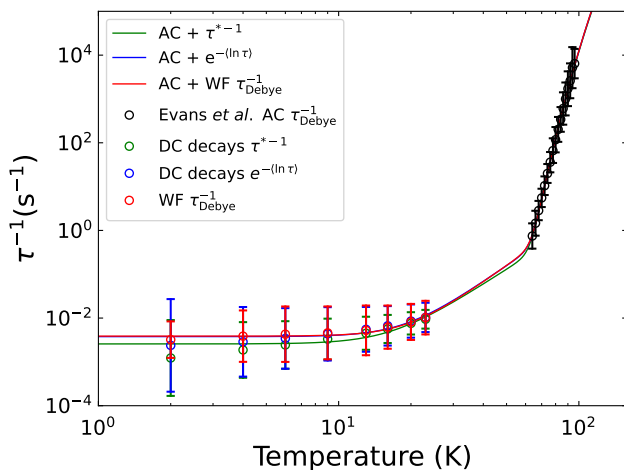

Figure S106: Relaxation rates  $\tau^*$  (green),  $e^{\langle \ln[\tau] \rangle}$  (blue) and  $\tau_{\text{debye}}$  (red) extracted from DC Decay and AC susceptibility<sup>3</sup> measurements of  $[\text{Dy}(\text{Dtp})_2][\text{Al}\{\text{OC}(\text{CF}_3)_3\}_4]$  fitted to Eq. 10. Parameters are given in Table 2.

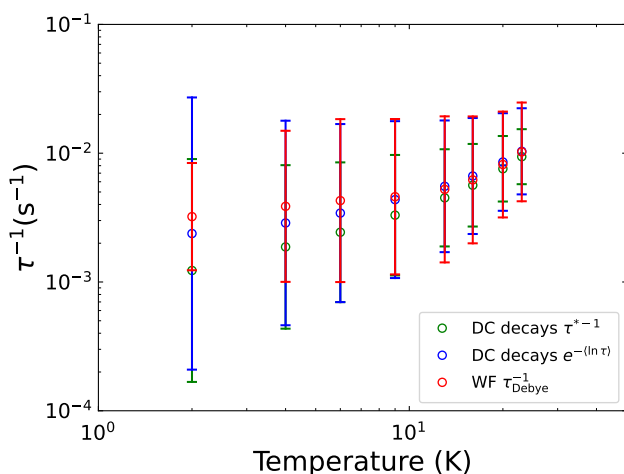

Figure S107: Comparison of  $\tau_{\text{debye}}$  and  $e^{\langle \ln[\tau] \rangle}$  extracted from Waveform and DC decay measurements of  $[\text{Dy}(\text{Dtp})_2][\text{Al}\{\text{OC}(\text{CF}_3)_3\}_4]$  to  $\tau^*$ .

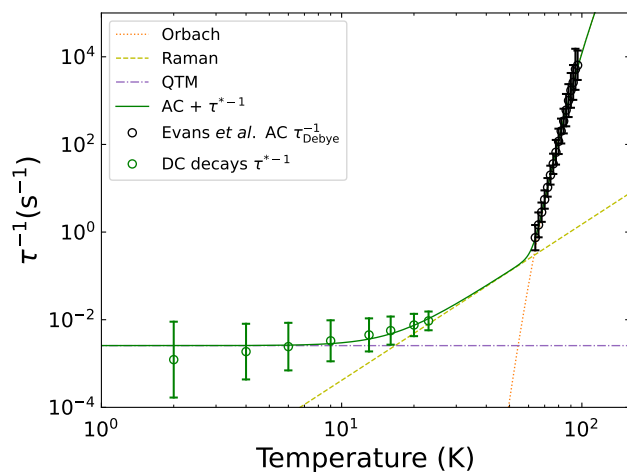

Figure S108: Relaxation rates  $\tau^{*-1}$  and  $\tau_{\text{debye}}$  extracted from DC decay and AC susceptibility<sup>3</sup> measurements of  $[\text{Dy}(\text{Dtp})_2][\text{Al}\{\text{OC}(\text{CF}_3)_3\}_4]$  fitted to Eq. 10. Parameters are given in Table 2 ( $\tau^*$  column).

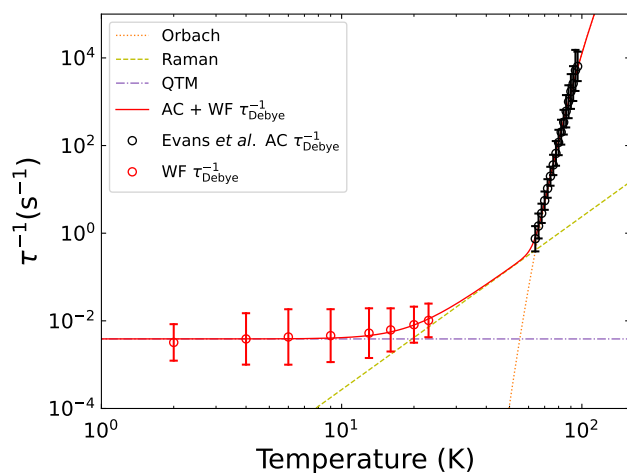

Figure S109: Relaxation rates  $\tau_{\text{debye}}$  extracted from Waveform and AC susceptibility<sup>3</sup> measurements of  $[\text{Dy}(\text{Dtp})_2][\text{Al}\{\text{OC}(\text{CF}_3)_3\}_4]$  fitted to Eq. 10. Parameters are given in Table 2 ( $\tau_{\text{debye}}$  column).



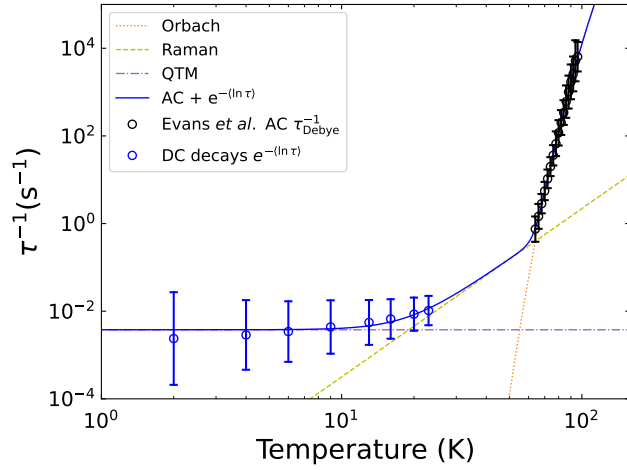

Figure S110: Relaxation rates  $e^{\langle \ln[\tau] \rangle}$  and  $\tau_{\text{debye}}^{-1}$  extracted from DC Decay and AC susceptibility<sup>3</sup> measurements of  $[\text{Dy}(\text{Dtp})_2][\text{Al}\{\text{OC}(\text{CF}_3)_3\}_4]$  fitted to Eq. 10. Parameters are given in Table 2 ( $e^{\langle \ln[\tau] \rangle}$  column).

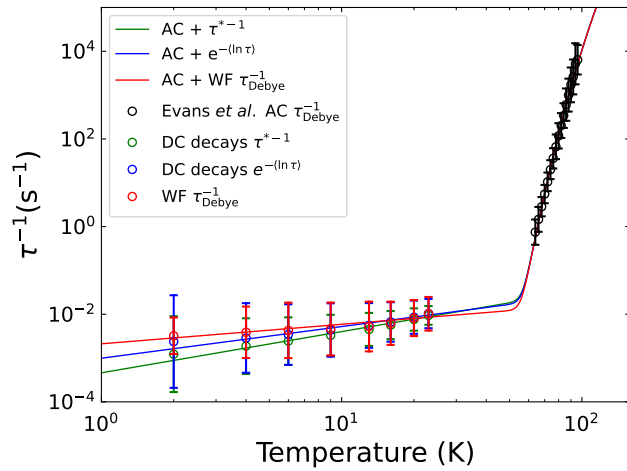

Figure S111: Comparison of  $\tau_{\text{debye}}$  (red),  $\tau^*$  (green) and  $e^{\langle \ln[\tau] \rangle}$  (blue) extracted from Waveform and DC decay measurements of  $[\text{Dy}(\text{Dtp})_2][\text{Al}\{\text{OC}(\text{CF}_3)_3\}_4]$ . The data was fitted to Eq. S1 including the relaxation rates obtained from AC susceptibility measurements of  $[\text{Dy}(\text{Dtp})_2][\text{Al}\{\text{OC}(\text{CF}_3)_3\}_4]$ .<sup>3</sup> Parameters are given in Table S16.

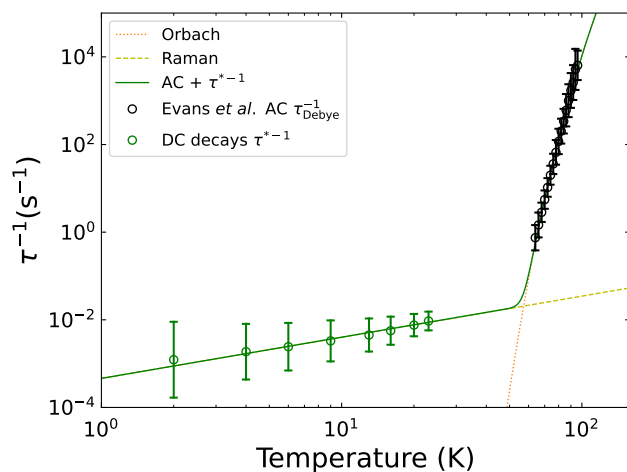

Figure S112: Relaxation rates  $\tau^{*-1}$  and  $\tau_{\text{debye}}$  extracted from DC decay and AC susceptibility<sup>3</sup> measurements of  $[\text{Dy}(\text{Dtp})_2][\text{Al}\{\text{OC}(\text{CF}_3)_3\}_4]$  fitted to Eq. S1. Parameters are given in Table S16 ( $\tau^*$  column).

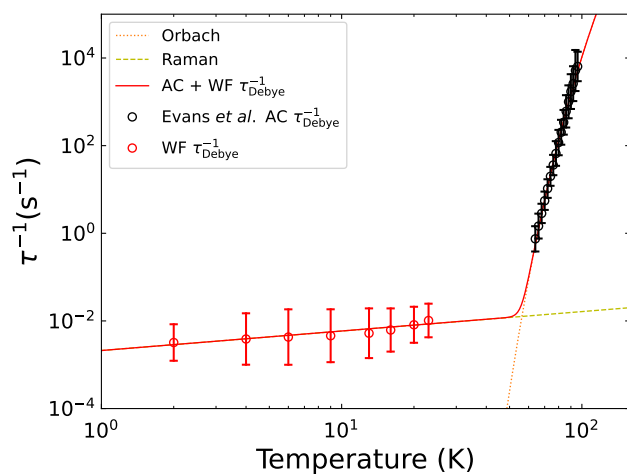

Figure S113: Relaxation rates  $\tau_{\text{debye}}$  extracted from Waveform and AC susceptibility<sup>3</sup> measurements of  $[\text{Dy}(\text{Dtp})_2][\text{Al}\{\text{OC}(\text{CF}_3)_3\}_4]$  fitted to Eq. S1. Parameters are given in Table S16 ( $\tau_{\text{debye}}$  column).

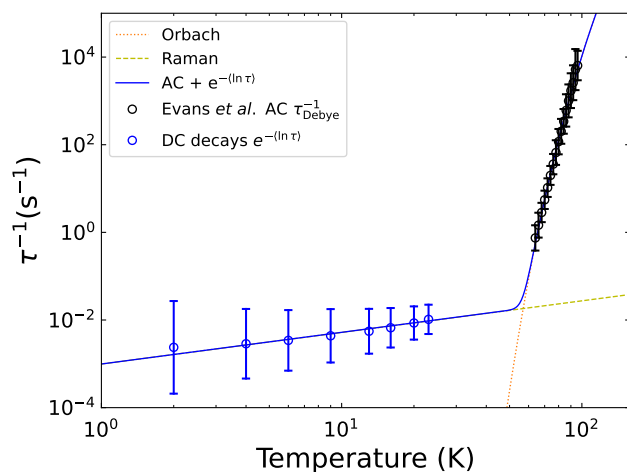

Figure S114: Relaxation rates  $e^{\langle \ln[\tau] \rangle}$  and  $\tau_{\text{debye}}$  extracted from DC Decay and AC susceptibility<sup>3</sup> measurements of  $[\text{Dy}(\text{Dtp})_2][\text{Al}\{\text{OC}(\text{CF}_3)_3\}_4]$  fitted to Eq. S1. Parameters are given in Table S16 ( $e^{\langle \ln[\tau] \rangle}$  column).

Table S16: Parameters obtained from fitting relaxation rates obtained from AC susceptibility measurements<sup>3</sup> along with those extracted from Waveform and DC decay measurements performed here to Eq. S1. The resultant fits are shown graphically in Fig. S111.

| Parameter                                     | DC decays    |                                 | Waveform              | Evans <i>et al.</i><br>Parameters <sup>3</sup> |
|-----------------------------------------------|--------------|---------------------------------|-----------------------|------------------------------------------------|
|                                               | $\tau^*$     | $e^{\langle \ln[\tau] \rangle}$ | $\tau_{\text{debye}}$ |                                                |
| $U_{\text{eff}}$ (K)                          | 1758(22)     | 1758(21)                        | 1756(23)              | 1761(19)                                       |
| $A$ ( $\tau_0 = 10^A/\text{s}$ )              | -11.66(0.13) | -11.66(0.13)                    | -11.65(0.13)          | -11.67(0.11)                                   |
| $R$ ( $C = 10^R/\text{s}^{-1}\text{K}^{-n}$ ) | -3.34(0.13)  | -3.00(0.16)                     | -2.675(0.098)         | -3.460(0.058)                                  |
| $n$                                           | 0.94(0.11)   | 0.72(0.14)                      | 0.444(0.093)          | 1.096(0.058)                                   |

## S3 Reanalysis of reported data

### S3.1 Standard deviations

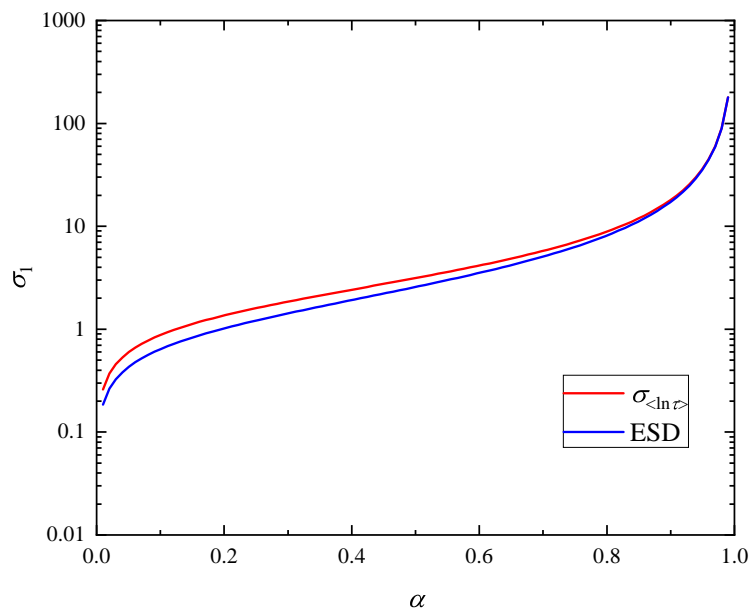

Figure S115: Comparison of the standard deviation of the Generalised Debye model  $\sigma_{\langle \ln \tau \rangle^4}$  to the ESD calculated by Reta and Chilton (ESD)<sup>5</sup> as a function of  $\alpha$ . There is good agreement over the whole range of  $\alpha$ .

### S3.2 $[\text{Dy}(\text{C}_5^i\text{Pr}_5)(\text{C}_5\text{Me}_5)][\text{B}(\text{C}_6\text{F}_5)_4]$

We take the raw DC decay curve recorded in zero field at 2 K of  $[\text{Dy}(\text{C}_5^i\text{Pr}_5)(\text{C}_5\text{Me}_5)][\text{B}(\text{C}_6\text{F}_5)_4]$  as reported by Guo *et al.*<sup>6</sup> The original fit (Fig. S116 and Fig S117 - blue) using Eq. 11 was obtained using the method where  $t_{\text{offset}} = 0$  and all other parameters were freely fitted. We refitted the DC decay curve using our measurement protocol;  $M_0$  fixed to the value of the first measured point,  $t_{\text{offset}} = 0$  and  $M_{\text{eq}}$  fixed to target (in this case  $M_{\text{eq}} = 0$ ).  $\tau^*$  and  $\beta$  are left to fit freely. The results of the new fit are shown in green in Fig. S116 and Fig. S117. The new fit encapsulates much more of the early decay compared to that performed by Guo *et al.*, but has less agreement around the middle before converging at long timescales. The parameters extracted from the new fit show an increase of  $\approx 16\%$  in  $\tau^*$  and  $\approx 5\%$  in  $\beta$  compared with Guo *et al.*, significantly altering  $e^{\langle \ln[\tau] \rangle}$ .

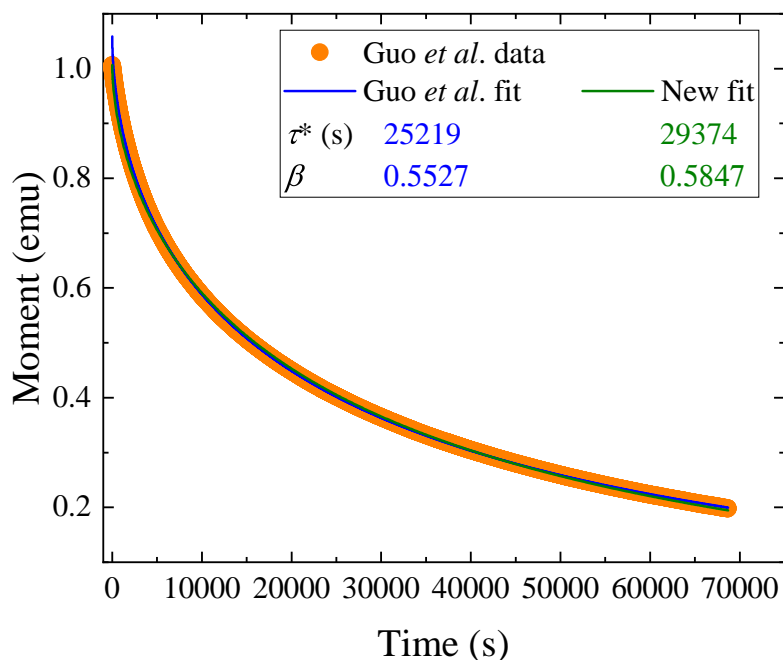

Figure S116: Plot of the 2 K decay curve of  $[\text{Dy}(\text{C}_5^i\text{Pr}_5)(\text{C}_5\text{Me}_5)][\text{B}(\text{C}_6\text{F}_5)_4]$  on a linear scale and overlaid by the fit to Eq. 11 performed by Guo *et al.* (blue) with  $t_{\text{offset}} = 0$  and all other parameters freely fitted.<sup>6</sup> We perform a fit fixing  $M_0$  to the first measured data point,  $M_{\text{eq}}$  fixed to target (in this case zero),  $t_{\text{offset}} = 0$ , with  $\tau^*$  and  $\beta$  freely fitted.

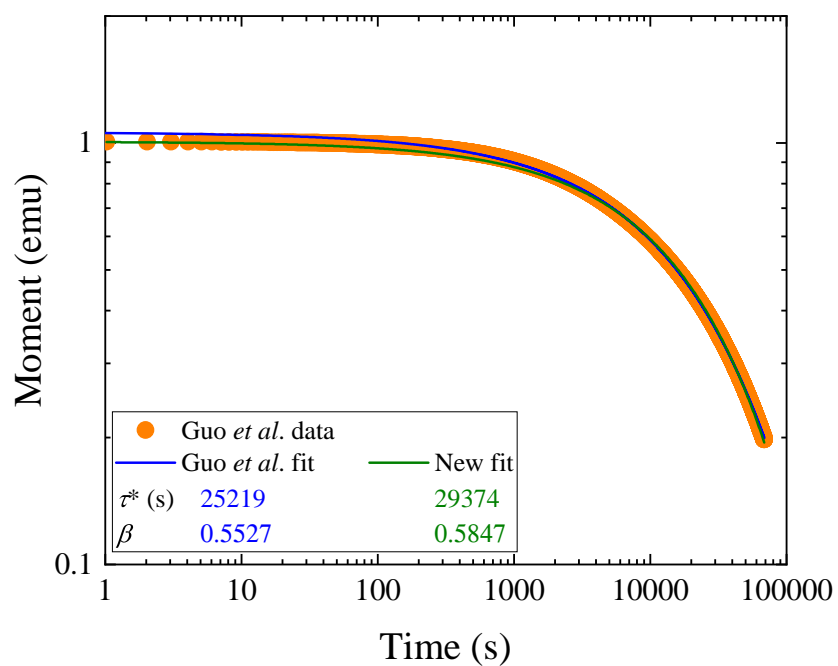

Figure S117: Plot of the 2 K decay curve of  $[\text{Dy}(\text{C}_5^i\text{Pr}_5)(\text{C}_5\text{Me}_5)][\text{B}(\text{C}_6\text{F}_5)_4]$  on a logarithmic scale and overlaid by the fit to Eq. 11 performed by Guo *et al.* (blue) with  $t_{\text{offset}} = 0$  and all other parameters freely fitted.<sup>6</sup> We perform a fit fixing  $M_0$  to the first measured data point,  $M_{\text{cq}}$  fixed to target (in this case zero),  $t_{\text{offset}} = 0$ , with  $\tau^*$  and  $\beta$  freely fitted.

## Notes and references

- (1) Spree, L.; Liu, F.; Neu, V.; Rosenkranz, M.; Velkos, G.; Wang, Y.; Schiemenz, S.; Dreiser, J.; Gargiani, P.; Valvidares, M.; Chen, C. H.; Büchner, B.; Avdoshenko, S. M.; Popov, A. A. Robust Single Molecule Magnet Monolayers on Graphene and Graphite with Magnetic Hysteresis up to 28 K. *Advanced Functional Materials* **2021**, *31*, 2105516.
- (2) Ding, Y.-S.; Blackmore, W. J. A.; Zhai, Y.-Q.; Giansiracusa, M. J.; Reta, D.; Vitorica-Yrezabal, I.; Winpenny, R. E. P.; Chilton, N. F.; Zheng, Y.-Z. Studies of the Temperature Dependence of the Structure and Magnetism of a Hexagonal-Bipyramidal Dysprosium(III) Single-Molecule Magnet. *Inorganic Chemistry* **2022**, *61*, 227–235.
- (3) Evans, P.; Reta, D.; Whitehead, G. F.; Chilton, N. F.; Mills, D. P. Bis-Monophospholyl Dysprosium Cation Showing Magnetic Hysteresis at 48 K. *Journal of the American Chemical Society* **2019**, *141*, 19935–19940.
- (4) Zorn, R. Logarithmic moments of relaxation time distributions. *The Journal of Chemical Physics* **2002**, *116*, 3204–3209.
- (5) Reta, D.; Chilton, N. F. Uncertainty estimates for magnetic relaxation times and magnetic relaxation parameters. *Physical Chemistry Chemical Physics* **2019**, *21*, 23567–23575.
- (6) Guo, F.-S.; Day, B. M.; Chen, Y.-C.; Tong, M.-L.; Mansikkamäki, A.; Layfield, R. A. Magnetic hysteresis up to 80 kelvin in a dysprosium metallocene single-molecule magnet. *Science* **2018**, *362*, 1400–1403.
